# Supplementary material for: Synthesis of pyrrole disulfides via umpolung of β-ketothioamides
Source: Royal Society of Chemistry journal article supplement (doi:10.1039/d2ob01506d), 2022-01-01

## Supporting Information

# Synthesis of pyrrole disulfides via umpolung of $\beta$ -ketothioamides

Xiangrui Meng,<sup>a</sup> Weisi Guo,<sup>b</sup> Guangming Nan<sup>\*a</sup> and Ming Li<sup>\*a,b</sup>

<sup>a</sup>Key Lab of Natural Product Chemistry and Application in Xinjiang, School of Chemistry and Environmental Science, Yili Normal University, Yining 835000, P. R. China. E-mail: nanguangming02@sohu.com

<sup>b</sup>College of Chemistry and Molecular Engineering, Qingdao University of Science and Technology, Qingdao 266042, P. R. China. E-mail: liming928@qust.edu.cn

## Table of Contents

|                                                  |     |
|--------------------------------------------------|-----|
| 1. General information .....                     | S2  |
| 2. General procedure synthesis of <b>3</b> ..... | S2  |
| 3. Characterization data .....                   | S2  |
| 4. Gram-scale reaction .....                     | S22 |
| 5. Mechanism study .....                         | S22 |
| 6. Follow-up transformations .....               | S23 |
| 7. Copies of NMR spectra .....                   | S25 |

## 1. General information

All the reactions were carried out under an air atmosphere using glassware without being predried. Thioamide needs to be synthesized, Sodium Carbonate ( $\text{Na}_2\text{CO}_3$ ), acetonitrile (MeCN), cyanoacetate acetate were obtained from commercial sources and used without further purification. The product was purified by column chromatography on silica gel (200-300 mesh) using analytical grade EtOAc, dichloromethane and petroleum ether. NMR spectra were recorded in on Avance 500 MHz spectrometers. Chemical shifts are in ppm with  $\text{CDCl}_3$  as internal standard. The following abbreviations are used for multiplicities: s = singlet, d = doublet, t = triplet, q = quartet, m = multiplet. The coupling constants  $J$  have been given in Hertz (Hz). HRMS were obtained on an Ultima Global spetrometer with an ESI source. IR spectra were recorded on Nicolet iS10. The X-ray single crystal diffraction was performed on Saturn 724<sup>+</sup> instrument.

## 2. General procedure synthesis of 3

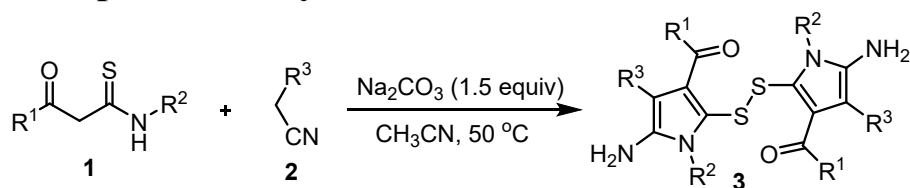

To a stirred solution of thioamides **1** (0.3 mmol) and ethyl 2-cyanoacetate **2** (0.3 mmol) in acetonitrile (1 mL) was added  $\text{Na}_2\text{CO}_3$  (0.45 mmol), the reaction mixture was stirred at 50 °C for 6-10 h. After completion of the reaction as monitored by TLC, the solvent was concentrated under vacuum and the residue was purified by flash column chromatography on silica gel with petroleum ether/ethyl acetate (3:1, v/v) as the eluent to give the desired product **3**.

## 3. Characterization data

Diethyl 5,5'-disulfanediybis(2-amino-4-benzoyl-1-phenyl-1H-pyrrole-3-carboxylate) (**3a**) (CCDC 1838147)

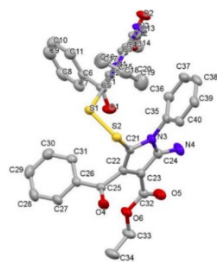

**Figure S1.** X-Ray crystal structure of **3a** with 50% probability displacement ellipsoids.

**Table S1 Crystal data and structure refinement for 3a**

|                                   |                                                                              |
|-----------------------------------|------------------------------------------------------------------------------|
| Chemical formula                  | C <sub>40</sub> H <sub>34</sub> N <sub>4</sub> O <sub>6</sub> S <sub>2</sub> |
| Formula weight                    | 730.1992                                                                     |
| Temperature                       | 173.1500 K                                                                   |
| Wavelength                        | 0.71073 Å                                                                    |
| Crystal system                    | Triclinic                                                                    |
| Space group                       | P -1                                                                         |
| Unit cell dimensions              | a = 8.200(3) Å                                                               |
|                                   | b = 14.629(5) Å                                                              |
|                                   | c = 17.002(6) Å                                                              |
| Volume                            | 1981.8(11) Å <sup>3</sup>                                                    |
| Z                                 | 2                                                                            |
| Density (calculated)              | 1.367 Mg/m <sup>3</sup>                                                      |
| Absorption coefficient            | 0.322 mm <sup>-1</sup>                                                       |
| F(000)                            | 848                                                                          |
| Crystal size                      | 0.596 x 0.066 x 0.035 mm <sup>3</sup>                                        |
| Theta range for data collection   | 1.427 to 27.481°.                                                            |
| Index ranges                      | -10<=h<=10, -18<=k<=18, -22<=l<=22                                           |
| Reflections collected             | 21520                                                                        |
| Independent reflections           | 8909 [R(int) = 0.0687]                                                       |
| Completeness to theta = 26.000°   | 99.0 %                                                                       |
| Absorption correction             | Semi-empirical from equivalents                                              |
| Max. and min. transmission        | 1.0000 and 0.6608                                                            |
| Refinement method                 | Full-matrix least-squares on F <sup>2</sup>                                  |
| Data / restraints / parameters    | 8909 / 0 / 533                                                               |
| Goodness-of-fit on F <sup>2</sup> | 1.115                                                                        |
| Final R indices [I>2sigma(I)]     | R1 = 0.0772, wR2 = 0.1684                                                    |
| R indices (all data)              | R1 = 0.0960, wR2 = 0.1797                                                    |
| Extinction coefficient            | n/a                                                                          |
| Largest diff. peak and hole       | 0.929 and -0.500 e.Å <sup>-3</sup>                                           |

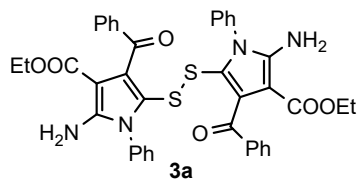

Isolated yield: 82% (90 mg), yellow solid, mp: 198-200 °C.

**IR (KBr)**  $\nu$  3432, 3056, 2983, 1669, 1614, 1453, 1235.

**<sup>1</sup>H NMR** (500 MHz, CDCl<sub>3</sub>)  $\delta$ : 7.96 (d,  $J$  = 7.2 Hz, 2H), 7.46 (t,  $J$  = 7.0 Hz, 1H), 7.38 (s, 3H), 7.30 (t,  $J$  = 7.0 Hz, 2H), 7.16 (s, 2H), 5.15 (s, 2H), 3.93 (q,  $J$  = 6.9 Hz, 4H), 0.74 (t,  $J$  = 7.2 Hz, 3H).

**<sup>13</sup>C NMR** (125 MHz, CDCl<sub>3</sub>)  $\delta$ : 192.7, 164.8, 148.4, 138.4, 133.8, 132.9, 132.6, 129.7, 129.5, 129.3, 128.1, 94.8, 59.5, 13.7.

**HRMS** (ESI-TOF, [M + H]<sup>+</sup>): calcd for C<sub>40</sub>H<sub>35</sub>N<sub>4</sub>O<sub>6</sub>S<sub>2</sub>, 731.1993; found, 731.1992.

**Diethyl 5,5'-disulfanediyldis(2-amino-4-(4-methylbenzoyl)-1-phenyl-1H-pyrrole-3-carboxylate) (3b)**

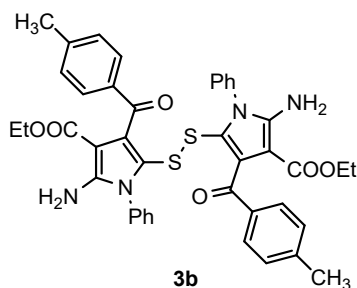

Isolated yield: 80% (94 mg), yellow solid, mp: 172-174 °C.

**IR (KBr)**  $\nu$  3474, 3060, 2977, 1695, 1672, 1522, 1496, 1235.

**<sup>1</sup>H NMR** (CDCl<sub>3</sub>, 500 MHz)  $\delta$ : 7.84 (d,  $J$  = 5.5 Hz, 2H), 7.37 (s, 3H), 7.14 (s, 2H), 7.08 (s, 2H), 5.13 (s, 2H), 3.96 (q,  $J$  = 6.9 Hz, 2H), 2.36 (s, 3H), 0.79 (t,  $J$  = 7.0 Hz, 3H).

**<sup>13</sup>C NMR** (CDCl<sub>3</sub>, 125 MHz)  $\delta$ : 192.5, 164.9, 148.3, 143.3, 136.0, 129.9, 129.5, 129.2, 128.8, 94.8, 59.5, 21.9, 13.8.

**HRMS** (ESI-TOF, [M + Na]<sup>+</sup>): calcd for C<sub>42</sub>H<sub>38</sub>N<sub>4</sub>O<sub>6</sub>NaS<sub>2</sub>, 781.2130; found, 781.2135.

**Diethyl 5,5'-disulfanediyldis(2-amino-4-(4-ethylbenzoyl)-1-phenyl-1H-pyrrole-3-carboxylate) (3c)**

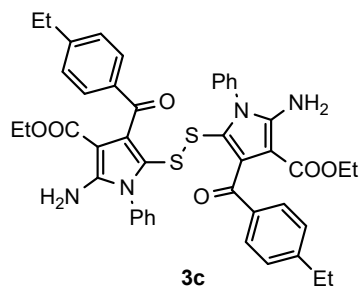

Isolated yield: 51% (62 mg), yellow solid, mp: 180-182 °C.

**IR (KBr)**  $\nu$  3457, 3054, 2969, 1663, 1515, 1453, 1383, 1236.

**<sup>1</sup>H NMR** (CDCl<sub>3</sub>, 500 MHz)  $\delta$ : 7.86 (d,  $J$  = 5.7 Hz, 2H), 7.38 (s, 3H), 7.11 (s, 4H), 5.15 (br s, 2H), 3.95 (d,  $J$  = 6.7 Hz, 2H), 2.65 (d,  $J$  = 6.7 Hz, 2H), 1.22 (t,  $J$  = 7.5 Hz, 3H), 0.76 (s, 3H).

**<sup>13</sup>C NMR** (CDCl<sub>3</sub>, 125 MHz)  $\delta$ : 192.4, 164.7, 149.4, 148.2, 136.1, 133.7, 129.8, 129.3, 129.0, 127.4, 94.6, 59.2, 28.9, 15.2, 13.5.

**HRMS** (ESI-TOF, [M + Na]<sup>+</sup>): calcd for C<sub>44</sub>H<sub>42</sub>N<sub>4</sub>O<sub>6</sub>NaS<sub>2</sub>, 809.2443; found, 809.2440.

**Diethyl 5,5'-disulfanediybis(2-amino-4-(4-methoxybenzoyl)-1-phenyl-1H-pyrrole-3-carboxylate) (3d)**

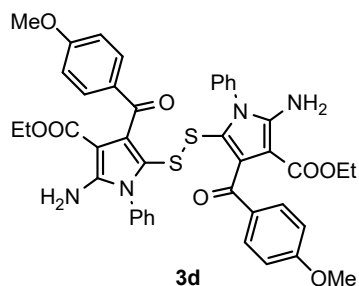

Isolated yield: 72% (88 mg), yellow solid, mp: 154-156 °C.

**IR (KBr)**  $\nu$  3451, 3070, 2978, 1671, 1518, 1495, 1245.

**<sup>1</sup>H NMR** (CDCl<sub>3</sub>, 500 MHz)  $\delta$ : 7.92 (s, 2H), 7.38 (s, 2H), 7.15 (s, 2H), 6.78 (s, 2H), 5.17 (s, 2H), 3.98 (d,  $J$  = 6.9 Hz, 2H), 3.81 (s, 3H), 0.82 (s, 3H).

**<sup>13</sup>C NMR** (CDCl<sub>3</sub>, 125 MHz)  $\delta$ : 191.5, 164.7, 163.2, 148.2, 133.7, 132.0, 131.6, 129.3, 129.1, 113.2, 94.6, 59.3, 55.4, 29.7, 13.7.

**HRMS** (ESI-TOF, [M + Na]<sup>+</sup>): calcd for C<sub>42</sub>H<sub>38</sub>N<sub>4</sub>O<sub>8</sub>NaS<sub>2</sub>, 813.2029; found, 813.2036.

**Diethyl 5,5'-disulfanediyldis(2-amino-4-(4-(methylthio)phenyl)-1-phenyl-1H-pyrrole-3-carboxylate) (3e)**

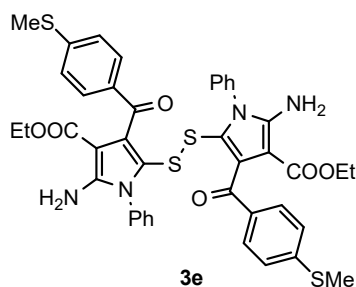

Isolated yield: 65% (82 mg), yellow solid, mp: 160-162 °C.

**IR (KBr)**  $\nu$  3448, 3057, 2977, 1677, 1518, 1497, 1382, 1246.

**<sup>1</sup>H NMR** (CDCl<sub>3</sub>, 500 MHz)  $\delta$ : 7.86 (s, 2H), 7.38 (s, 3H), 7.11 (s, 4H), 5.18 (s, 2H), 3.98 (d,  $J$  = 6.6 Hz, 2H), 2.48 (s, 3H), 0.82 (s, 3H).

**<sup>13</sup>C NMR** (CDCl<sub>3</sub>, 125 MHz)  $\delta$ : 192.0, 164.7, 148.4, 145.3, 134.9, 133.8, 130.2, 129.5, 129.3, 124.6, 59.6, 14.8, 13.9.

**HRMS** (ESI-TOF, [M + Na]<sup>+</sup>): calcd for C<sub>42</sub>H<sub>38</sub>N<sub>4</sub>O<sub>6</sub>NaS<sub>4</sub>, 845.1572; found, 845.1556.

**Diethyl 5,5'-disulfanediyldis(2-amino-4-(4-fluorobenzoyl)-1-phenyl-1H-pyrrole-3-carboxylate) (3f)**

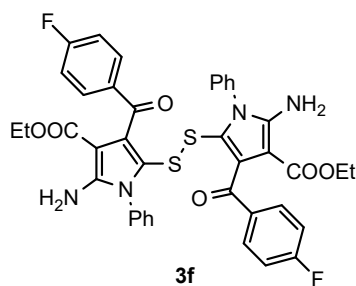

Isolated yield: 89% (105 mg), yellow solid, mp: 158-160 °C.

**IR (KBr)**  $\nu$  3478, 3069, 2985, 1671, 1493, 1385, 1318, 1279.

**<sup>1</sup>H NMR** (CDCl<sub>3</sub>, 500 MHz)  $\delta$ : 7.97 (s, 2H), 7.39 (s, 3H), 7.16 (s, 2H), 6.97 (t,  $J$  = 7.9 Hz, 2H), 5.17 (s, 2H), 3.96 (q,  $J$  = 6.9 Hz, 2H), 0.80 (t,  $J$  = 6.7 Hz, 3H).

**<sup>13</sup>C NMR** (CDCl<sub>3</sub>, 125 MHz)  $\delta$ : 191.0, 165.5 (d,  $^1J_{C-F}$  = 254.7 Hz), 164.5, 148.3, 134.8, 133.6, 132.8, 132.1 (d,  $^3J_{C-F}$  = 6.1 Hz), 129.4, 129.3, 129.2, 115.1 (d,  $^2J_{C-F}$  = 22.0 Hz), 94.5, 59.5, 13.6.

$^{19}\text{F}$  NMR (376 MHz,  $\text{CDCl}_3$ )  $\delta$ : 105.99.

HRMS (ESI-TOF,  $[\text{M} + \text{Na}]^+$ ): calcd for  $\text{C}_{40}\text{H}_{32}\text{N}_4\text{O}_6\text{NaS}_2\text{F}_2$ , 789.1629; found, 789.1636.

**Diethyl 5,5'-disulfanediylbis(2-amino-4-(4-chlorobenzoyl)-1-phenyl-1H-pyrrole-3-carboxylate) (3g)**

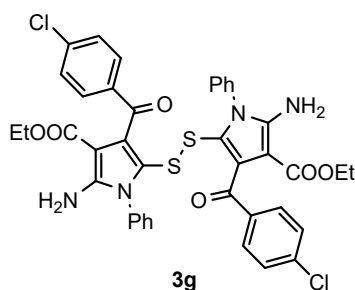

Isolated yield: 72% (89 mg), yellow solid, mp: 154-156 °C.

IR (KBr)  $\nu$  3476, 3065, 2984, 1670, 1497, 1385, 1279, 1232.

$^1\text{H}$  NMR ( $\text{CDCl}_3$ , 500 MHz)  $\delta$ : 7.89 (d,  $J = 7.7$  Hz, 2H), 7.40 (s, 3H), 7.28 (d,  $J = 8.0$  Hz, 2H), 7.16 (s, 2H), 5.17 (s, 2H), 3.97 (q,  $J = 6.9$  Hz, 2H), 0.82 (t,  $J = 6.5$  Hz, 3H).

$^{13}\text{C}$  NMR ( $\text{CDCl}_3$ , 125 MHz)  $\delta$ : 191.4, 164.5, 148.4, 139.1, 136.9, 133.7, 131.0, 129.6, 129.5, 129.3, 128.5, 94.6, 59.7, 13.8.

HRMS (ESI-TOF,  $[\text{M} + \text{Na}]^+$ ): calcd for  $\text{C}_{40}\text{H}_{32}\text{N}_4\text{O}_6\text{NaS}_2\text{Cl}_2$ , 821.1033; found, 821.1038.

**Diethyl 5,5'-disulfanediylbis(2-amino-4-(4-bromobenzoyl)-1-phenyl-1H-pyrrole-3-carboxylate) (3h)**

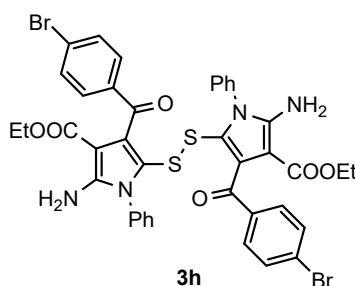

Isolated yield: 75% (102 mg), yellow solid, mp: 154-156 °C.

IR (KBr)  $\nu$  3476, 3062, 1668, 1495, 1385, 1278, 1231.

$^1\text{H}$  NMR ( $\text{CDCl}_3$ , 500 MHz)  $\delta$ : 7.81 (d,  $J = 7.8$  Hz, 2H), 7.44 (d,  $J = 7.5$  Hz, 2H), 7.40 (s, 3H), 7.16 (s, 2H), 5.17 (s, 2H), 3.98 (q,  $J = 6.8$  Hz, 2H), 0.82 (t,  $J = 6.7$  Hz,

3H).

$^{13}\text{C}$  NMR ( $\text{CDCl}_3$ , 125 MHz)  $\delta$ : 191.6, 164.5, 148.5, 137.2, 133.6, 131.5, 131.2, 129.6, 129.5, 129.2, 127.9, 94.6, 59.7, 13.8.

HRMS (ESI-TOF,  $[\text{M} + \text{Na}]^+$ ): calcd for  $\text{C}_{40}\text{H}_{32}\text{N}_4\text{O}_6\text{NaS}_2\text{Br}_2$ , 909.0028; found, 909.0037.

**Diethyl 5,5'-disulfanediyldis(2-amino-4-(4-cyanobenzoyl)-1-phenyl-1H-pyrrole-3-carboxylate) (3i)**

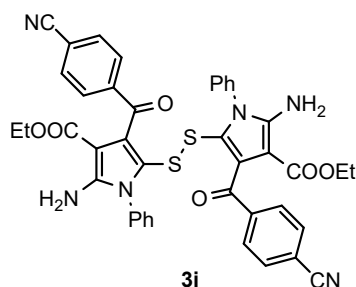

Isolated yield: 60% (72 mg), yellow solid, mp: 234-236 °C.

IR (KBr)  $\nu$  3450, 3069, 2978, 1690, 1520, 1487, 1384, 1282.

$^1\text{H}$  NMR ( $\text{CDCl}_3$ , 500 MHz)  $\delta$ : 8.04 (d,  $J = 8.0$  Hz, 2H), 7.63 (d,  $J = 7.9$  Hz, 2H), 7.43 (s, 3H), 7.18 (s, 2H), 5.20 (s, 2H), 3.96 (q,  $J = 7.0$  Hz, 2H), 0.79 (t,  $J = 6.6$  Hz, 3H).

$^{13}\text{C}$  NMR ( $\text{CDCl}_3$ , 125 MHz)  $\delta$ : 190.8, 164.1, 148.5, 141.3, 133.4, 132.0, 131.7, 129.8, 129.7, 129.1, 118.3, 115.7, 94.3, 59.8, 13.9.

HRMS (ESI-TOF,  $[\text{M} + \text{Na}]^+$ ): calcd for  $\text{C}_{42}\text{H}_{32}\text{N}_6\text{O}_6\text{NaS}_2$ , 803.1722; found, 803.1741.

**Diethyl 5,5'-disulfanediyldis(2-amino-4-(4-nitrobenzoyl)-1-phenyl-1H-pyrrole-3-carboxylate) (3j)**

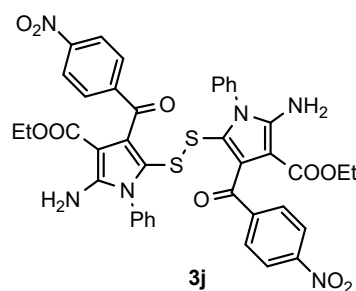

Isolated yield: 52% (66 mg), yellow solid, mp: 230-232 °C.



**IR (KBr)**  $\nu$  3460, 3073, 2981, 1679, 1492, 1385, 1226.

**<sup>1</sup>H NMR** (CDCl<sub>3</sub>, 500 MHz)  $\delta$ : 8.18 (d,  $J$  = 8.5 Hz, 2H), 8.11 (d,  $J$  = 8.5 Hz, 2H), 7.44 (s, 3H), 7.20 (br s, 2H), 5.19 (s, 2H), 3.95 (d,  $J$  = 6.9 Hz, 2H), 0.78 (t,  $J$  = 6.7 Hz, 3H).

**<sup>13</sup>C NMR** (CDCl<sub>3</sub>, 125 MHz)  $\delta$ : 190.5, 164.1, 150.0, 148.6, 146.7, 133.4, 131.8, 130.4, 129.8, 129.1, 123.4, 94.3, 59.9, 13.9.

**HRMS** (ESI-TOF, [M + Na]<sup>+</sup>): calcd for C<sub>40</sub>H<sub>32</sub>N<sub>6</sub>O<sub>10</sub>NaS<sub>2</sub>, 843.1519; found, 843.1509.

**Diethyl 5,5'-disulfanediylbis(2-amino-1-phenyl-4-(4-(trifluoromethyl)benzoyl)-1H-pyrrole-3-carboxylate) (3k)**

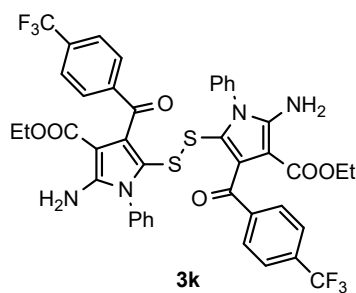

Isolated yield: 60% (80 mg), yellow solid, mp: 154-156 °C.

**IR (KBr)**  $\nu$  3440, 3067, 2981, 1677, 1496, 1328, 1231.

**<sup>1</sup>H NMR** (CDCl<sub>3</sub>, 500 MHz)  $\delta$ : 8.05 (d,  $J$  = 7.7 Hz, 2H), 7.57 (d,  $J$  = 7.6 Hz, 2H), 7.40 (s, 3H), 7.16 (s, 2H), 5.18 (s, 2H), 3.93 (q,  $J$  = 6.9 Hz, 2H), 0.75 (t,  $J$  = 6.7 Hz, 3H).

**<sup>13</sup>C NMR** (CDCl<sub>3</sub>, 125 MHz)  $\delta$ : 191.5, 164.2, 148.4, 140.9, 133.9 (t, <sup>2</sup> $J_{C-F}$  = 32.2 Hz), 133.4, 132.1, 129.7, 129.5, 129.4, 129.1, 126.4, 125.1 (d, <sup>3</sup> $J_{C-F}$  = 3.6 Hz), 123.7 (d, <sup>1</sup> $J_{C-F}$  = 272.9 Hz), 121.0, 114.8, 94.4, 59.5, 13.5.

**<sup>19</sup>F NMR** (376 MHz, CDCl<sub>3</sub>)  $\delta$ : 62.96.

**HRMS** (ESI-TOF, [M + Na]<sup>+</sup>): calcd for C<sub>42</sub>H<sub>32</sub>N<sub>4</sub>O<sub>6</sub>F<sub>6</sub>NaS<sub>2</sub>, 889.1565; found, 889.1568.

**Diethyl 5,5'-disulfanediylbis(2-amino-4-(2-fluorobenzoyl)-1-phenyl-1H-pyrrole-3-carboxylate) (3l)**

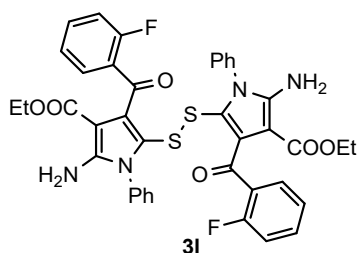

Isolated yield: 52% (62 mg), yellow solid, mp: 160-162 °C.

**IR (KBr)**  $\nu$  3473, 3060, 2980, 1671, 1452, 1385, 1271, 1230.

**<sup>1</sup>H NMR** (CDCl<sub>3</sub>, 500 MHz)  $\delta$ : 7.82 (t,  $J$  = 7.4 Hz, 1H), 7.39 (s, 4H), 7.16 (s, 2H), 7.07-6.97 (m, 2H), 5.18 (s, 2H), 3.96 (q,  $J$  = 6.9 Hz, 2H), 0.87 (t,  $J$  = 7.0 Hz, 3H).

**<sup>13</sup>C NMR** (CDCl<sub>3</sub>, 125 MHz)  $\delta$ : 189.0, 164.5, 161.3 (d,  $^1J_{C-F}$  = 259.6 Hz), 148.3, 133.7, 133.6, 133.3, 132.6, 129.4, 129.2, 129.1, 127.4, 127.3, 123.6, 116.3 (d,  $^2J_{C-F}$  = 21.9 Hz), 94.0, 59.3, 13.7, 13.6.

**<sup>19</sup>F NMR** (376 MHz, CDCl<sub>3</sub>)  $\delta$ : 112.82.

**HRMS** (ESI-TOF, [M + Na]<sup>+</sup>): calcd for C<sub>40</sub>H<sub>32</sub>N<sub>4</sub>O<sub>6</sub>NaS<sub>2</sub>F<sub>2</sub>, 789.1629; found, 789.1633.

**Diethyl 5,5'-disulfanediybis(2-amino-4-(2-chlorobenzoyl)-1-phenyl-1H-pyrrole-3-carboxylate) (3m)**

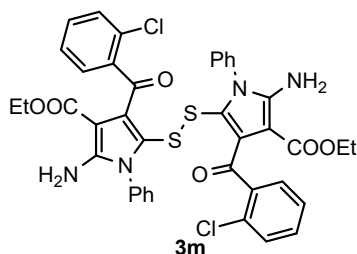

Isolated yield: 48% (59 mg), yellow solid, mp: 184-186 °C.

**IR (KBr)**  $\nu$  3445, 3070, 2982, 1667, 1516, 1434, 1386, 1225.

**<sup>1</sup>H NMR** (CDCl<sub>3</sub>, 500 MHz)  $\delta$ : 7.60 (d,  $J$  = 7.1 Hz, 2H), 7.41 (t,  $J$  = 3.1 Hz, 4H), 7.31 (td,  $J$  = 3.3 Hz, 1H), 7.15-7.10 (m, 3H), 5.22 (s, 2H), 4.00 (q,  $J$  = 7.1 Hz, 2H), 0.95 (t,  $J$  = 7.3 Hz, 3H).

**<sup>13</sup>C NMR** (CDCl<sub>3</sub>, 125 MHz)  $\delta$ : 190.2, 164.8, 148.8, 138.0, 133.7, 133.2, 132.8, 132.5, 132.0, 131.8, 131.0, 130.8, 130.2, 130.0, 129.5, 129.3, 128.0, 126.4, 117.4, 95.4, 94.4, 59.6, 14.1.

**HRMS** (ESI-TOF,  $[M + Na]^+$ ): calcd for  $C_{40}H_{32}N_4O_6NaS_2Cl_2$ , 821.1038; found, 821.1033.

**Diethyl 5,5'-disulfanediylbis(2-amino-4-(2-bromobenzoyl)-1-phenyl-1H-pyrrole-3-carboxylate) (3n)**

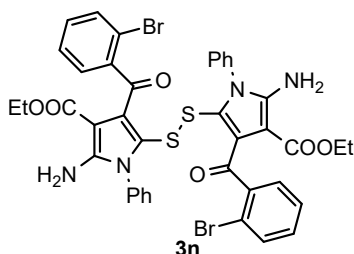

Isolated yield: 85% (116 mg), yellow solid, mp: 178-180 °C.

**IR (KBr)**  $\nu$  3475, 3063, 2980, 1667, 1517, 1431, 1362, 1224.

**$^1H$  NMR** ( $CDCl_3$ , 500 MHz)  $\delta$ : 7.63 (d,  $J = 7.3$  Hz, 1H), 7.57 (d,  $J = 6.4$  Hz, 1H), 7.41 (s, 3H), 7.22 (t,  $J = 6.6$  Hz, 1H), 7.16 (t,  $J = 6.6$  Hz, 3H), 5.22 (s, 2H), 4.00 (d,  $J = 6.1$  Hz, 2H), 0.95 (s, 3H).

**$^{13}C$  NMR** ( $CDCl_3$ , 125 MHz)  $\delta$ : 190.5, 164.8, 148.9, 139.5, 134.3, 133.7, 133.0, 132.1, 132.0, 129.6, 129.4, 127.1, 121.5, 118.1, 94.5, 59.7, 14.2.

**HRMS** (ESI-TOF,  $[M + Na]^+$ ): calcd for  $C_{40}H_{32}N_4O_6NaS_2Br_2$ , 909.0028; found, 909.0030.

**Diethyl 5,5'-disulfanediylbis(2-amino-4-(3-chlorobenzoyl)-1-phenyl-1H-pyrrole-3-carboxylate) (3o)**

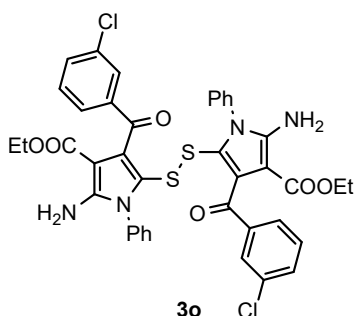

Isolated yield: 51% (62 mg), yellow solid, mp: 184-186 °C.

**IR (KBr)**  $\nu$  3451, 3062, 2979, 1683, 1568, 1497, 1384, 1274.

**$^1H$  NMR** ( $CDCl_3$ , 500 MHz)  $\delta$ : 7.96 (s, 1H), 7.79 (d,  $J = 7.9$  Hz, 1H), 7.45-7.41 (m, 4H), 7.21 (t,  $J = 7.6$  Hz, 3H), 5.20 (s, 2H), 3.96 (q,  $J = 7.1$  Hz, 2H), 0.80 (t,  $J = 6.9$  Hz, 3H).

$^{13}\text{C}$  NMR ( $\text{CDCl}_3$ , 125 MHz)  $\delta$ : 191.2, 164.5, 148.5, 140.1, 134.4, 133.7, 132.5, 132.2, 129.6, 129.5, 129.4, 129.3, 128.9, 128.5, 115.0, 94.6, 59.6, 13.8.

HRMS (ESI-TOF,  $[\text{M} + \text{Na}]^+$ ): calcd for  $\text{C}_{40}\text{H}_{32}\text{N}_4\text{O}_6\text{NaS}_2\text{Cl}_2$ , 821.1038; found, 821.1030.

**Diethyl 5,5'-disulfanediylbis(4-(2-naphthoyl)-2-amino-1-phenyl-1H-pyrrole-3-carboxylate) (3p)**

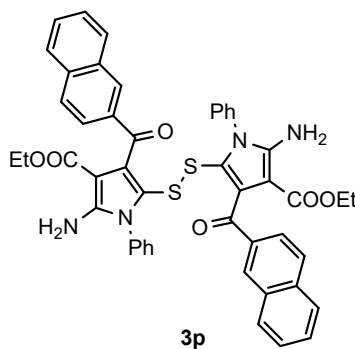

Isolated yield: 78% (100 mg), yellow solid, mp: 152-154 °C.

IR (KBr)  $\nu$  3433, 3057, 2982, 1709, 1670, 1497, 1384, 1257.

$^1\text{H}$  NMR ( $\text{CDCl}_3$ , 500 MHz)  $\delta$ : 8.43 (s, 1H), 8.14 (d,  $J = 8.0$  Hz, 1H), 7.80 (s, 3H), 7.50-7.37 (m, 5H), 7.18 (s, 2H), 5.20 (s, 2H), 3.87 (s, 2H), 0.66 (s, 3H).

$^{13}\text{C}$  NMR ( $\text{CDCl}_3$ , 125 MHz)  $\delta$ : 193.0, 164.7, 148.3, 135.9, 135.5, 133.7, 132.6, 130.1, 129.4, 129.2, 128.2, 127.9, 127.7, 126.2, 125.0, 94.8, 59.5, 13.7.

HRMS (ESI-TOF,  $[\text{M} + \text{Na}]^+$ ): calcd for  $\text{C}_{48}\text{H}_{38}\text{N}_4\text{O}_6\text{NaS}_2$ , 853.2130; found, 853.2131.

**Diethyl 5,5'-disulfanediylbis(2-amino-4-(benzo[d][1,3]dioxole-5-carbonyl)-1-phenyl-1H-pyrrole-3-carboxylate) (3q)**

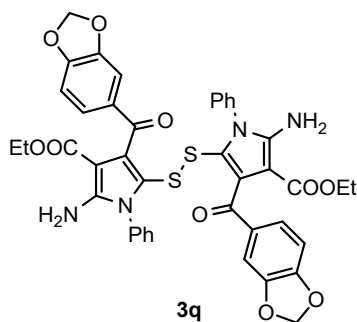

Isolated yield: 87% (110 mg), yellow solid, mp: 220-222 °C.

IR (KBr)  $\nu$  3447, 3074, 2979, 1675, 1598, 1484, 1383, 1254.

**<sup>1</sup>H NMR** (CDCl<sub>3</sub>, 500 MHz)  $\delta$ : 7.49 (s, 2H), 7.38 (s, 3H), 7.15 (s, 2H), 6.67 (s, 1H), 6.01 (s, 2H), 5.17 (s, 2H), 3.98 (s, 2H), 0.85 (s, 3H).

**<sup>13</sup>C NMR** (CDCl<sub>3</sub>, 125 MHz)  $\delta$ : 191.7, 164.6, 154.1, 151.3, 148.1, 147.6, 133.6, 133.3, 129.2, 126.9, 108.7, 108.2, 107.5, 101.6, 94.5, 59.3, 13.8.

**HRMS** (ESI-TOF, [M + Na]<sup>+</sup>): calcd for C<sub>42</sub>H<sub>34</sub>N<sub>4</sub>O<sub>10</sub>NaS<sub>2</sub>, 841.1614; found, 841.1620.

**Diethyl 5,5'-disulfanediylbis(2-amino-1-phenyl-4-(thiophene-2-carbonyl)-1H-pyrrole-3-carboxylate) (3r)**

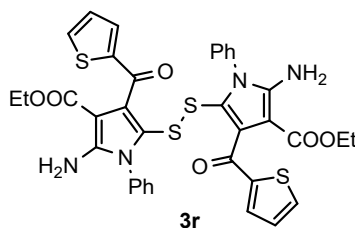

Isolated yield: 52% (59 mg), yellow solid, mp: 225-227 °C.

**IR (KBr)**  $\nu$  3467, 3098, 2979, 1671, 1519, 1452, 1353, 1243.

**<sup>1</sup>H NMR** (CDCl<sub>3</sub>, 500 MHz)  $\delta$ : 7.59 (s, 2H), 7.40 (s, 4H), 7.17 (s, 1H), 6.92 (s, 1H), 5.26 (s, 2H), 4.02 (s, 2H), 0.89 (s, 3H).

**<sup>13</sup>C NMR** (CDCl<sub>3</sub>, 125 MHz)  $\delta$ : 184.9, 164.7, 148.4, 146.0, 133.7, 130.3, 129.5, 128.1, 125.4, 119.8, 113.4, 94.6, 41.4, 29.8, 13.8.

**HRMS** (ESI-TOF, [M + Na]<sup>+</sup>): calcd for C<sub>36</sub>H<sub>30</sub>N<sub>4</sub>O<sub>6</sub>NaS<sub>4</sub>, 765.0946; found, 765.0943.

**Diethyl 5,5'-disulfanediylbis(2-amino-4-benzoyl-1-(p-tolyl)-1H-pyrrole-3-carboxylate) (3s)**

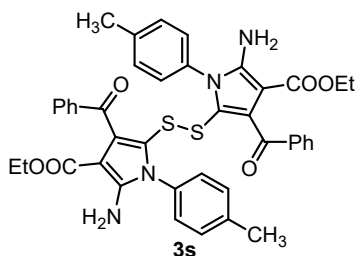

Isolated yield: 76% (89 mg), yellow solid, mp: 210-212 °C.

**IR (KBr)**  $\nu$  3447, 3062, 2979, 1670, 1522, 1448, 1384, 1278.

**<sup>1</sup>H NMR** (CDCl<sub>3</sub>, 500 MHz)  $\delta$ : 7.94 (d, *J* = 7.9 Hz, 2H), 7.45 (t, *J* = 7.3 Hz, 1H), 7.29

(t,  $J = 7.3$  Hz, 2H), 7.17 (d,  $J = 6.3$  Hz, 2H), 7.03 (s, 2H), 5.13 (s, 2H), 3.93 (q,  $J = 7.1$  Hz, 2H), 2.35 (s, 3H), 0.74 (t,  $J = 6.7$  Hz, 3H).

$^{13}\text{C}$  NMR ( $\text{CDCl}_3$ , 125 MHz)  $\delta$ : 192.7, 164.8, 148.5, 139.4, 138.4, 132.5, 131.1, 130.1, 129.7, 128.0, 128.1, 94.7, 59.4, 21.4, 13.7.

HRMS (ESI-TOF,  $[\text{M} + \text{Na}]^+$ ): calcd for  $\text{C}_{42}\text{H}_{38}\text{N}_4\text{O}_6\text{NaS}_2$ , 781.2130; found, 781.2142.

**Diethyl 5,5'-disulfanediybis(2-amino-4-benzoyl-1-(4-methoxyphenyl)-1H-pyrrole-3-carboxylate) (3t)**

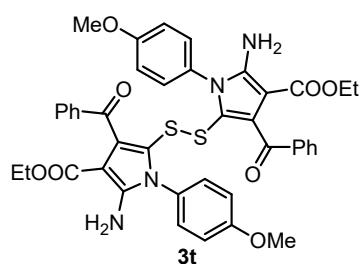

Isolated yield: 78% (95 mg), yellow solid, mp: 188-190 °C.

IR (KBr)  $\nu$  3445, 3059, 2978, 1667, 1518, 1496, 1385, 1278.

$^1\text{H}$  NMR ( $\text{CDCl}_3$ , 500 MHz)  $\delta$ : 7.94 (d,  $J = 7.3$  Hz, 2H), 7.45 (t,  $J = 7.3$  Hz, 1H), 7.29 (t,  $J = 7.0$  Hz, 2H), 7.09 (s, 2H), 6.87 (s, 2H), 5.12 (s, 2H), 3.92 (q,  $J = 6.5$  Hz, 2H), 3.80 (s, 3H), 0.74 (t,  $J = 6.5$  Hz, 3H).

$^{13}\text{C}$  NMR ( $\text{CDCl}_3$ , 125 MHz)  $\delta$ : 192.7, 164.8, 160.1, 148.7, 138.4, 132.5, 130.5, 129.7, 128.1, 126.2, 114.6, 94.6, 59.4, 55.6, 13.7.

HRMS (ESI-TOF,  $[\text{M} + \text{Na}]^+$ ): calcd for  $\text{C}_{42}\text{H}_{38}\text{N}_4\text{O}_8\text{NaS}_2$ , 813.2029; found, 813.2025.

**Diethyl 5,5'-disulfanediybis(2-amino-4-benzoyl-1-(4-fluorophenyl)-1H-pyrrole-3-carboxylate) (3u)**

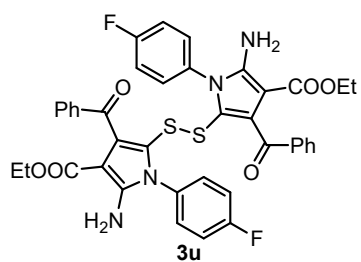

Isolated yield: 71% (84 mg), yellow solid, mp: 179-181 °C.

**IR (KBr)**  $\nu$  3453, 3064, 2980, 1667, 1598, 1235, 1219.

**$^1\text{H}$  NMR** ( $\text{CDCl}_3$ , 500 MHz)  $\delta$ : 7.93 (d,  $J = 6.7$  Hz, 2H), 7.47 (t,  $J = 6.7$  Hz, 1H), 7.30 (s, 2H), 7.19 (s, 2H), 7.08 (s, 2H), 5.12 (s, 2H), 3.92 (d,  $J = 6.2$  Hz, 2H), 0.72 (s, 3H).

**$^{13}\text{C}$  NMR** ( $\text{CDCl}_3$ , 125 MHz)  $\delta$ : 192.3, 164.4, 162.7 (d,  $^1J_{\text{C-F}} = 250.2$  Hz), 148.4, 138.1, 133.1, 132.5, 131.1, 129.4, 128.0, 116.4 (d,  $^2J_{\text{C-F}} = 21.9$  Hz), 94.7, 59.5, 13.4.

**$^{19}\text{F}$  NMR** (376 MHz,  $\text{CDCl}_3$ )  $\delta$ : 110.99.

**HRMS** (ESI-TOF,  $[\text{M} + \text{Na}]^+$ ): calcd for  $\text{C}_{40}\text{H}_{32}\text{N}_4\text{O}_6\text{F}_2\text{NaS}_2$ , 789.1629; found, 789.1637.

**Diethyl 5,5'-disulfanediybis(2-amino-4-benzoyl-1-(4-chlorophenyl)-1H-pyrrole-3-carboxylate) (3v)**

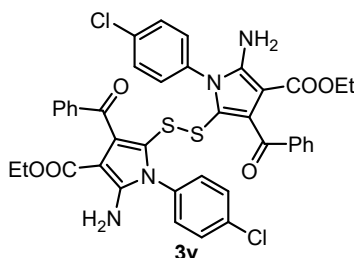

Isolated yield: 67% (83 mg), yellow solid, mp: 182-184 °C.

**IR (KBr)**  $\nu$  3446, 3061, 2980, 1667, 1581, 1497, 1384, 1233.

**$^1\text{H}$  NMR** ( $\text{CDCl}_3$ , 500 MHz)  $\delta$ : 7.92 (d,  $J = 7.5$  Hz, 2H), 7.47 (t,  $J = 7.4$  Hz, 1H), 7.37 (d,  $J = 7.4$  Hz, 2H), 7.30 (t,  $J = 7.0$  Hz, 2H), 7.15 (s, 2H), 5.14 (s, 2H), 3.92 (d,  $J = 6.4$  Hz, 2H), 0.73 (s, 3H).

**$^{13}\text{C}$  NMR** ( $\text{CDCl}_3$ , 125 MHz)  $\delta$ : 192.5, 164.6, 148.4, 138.2, 135.5, 132.8, 132.2, 130.6, 129.8, 129.6, , 128.2, 94.9, 59.6, 29.9, 13.6.

**HRMS** (ESI-TOF,  $[\text{M} + \text{Na}]^+$ ): calcd for  $\text{C}_{40}\text{H}_{32}\text{N}_4\text{O}_6\text{NaCl}_2\text{S}_2$ , 821.1038; found, 821.1047.

**Diethyl 5,5'-disulfanediybis(2-amino-4-benzoyl-1-(4-bromophenyl)-1H-pyrrole-3-carboxylate) (3w)**

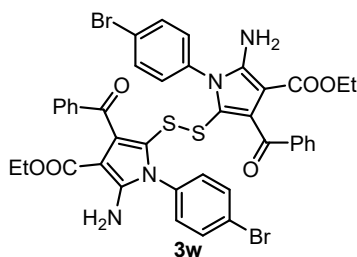

Isolated yield: 75% (102 mg), yellow solid, mp: 238-240 °C.

**IR (KBr)**  $\nu$  3428, 3062, 2980, 1667, 1522, 1495, 1235.

**<sup>1</sup>H NMR** (CDCl<sub>3</sub>, 500 MHz)  $\delta$ : 7.91 (d,  $J$  = 7.3 Hz, 2H), 7.53 (d,  $J$  = 6.1 Hz, 2H), 7.47 (t,  $J$  = 7.3 Hz, 1H), 7.30 (s, 2H), 7.08 (s, 2H), 5.16 (s, 2H), 3.92 (d,  $J$  = 6.1 Hz, 2H), 0.73 (s, 3H).

**<sup>13</sup>C NMR** (CDCl<sub>3</sub>, 125 MHz)  $\delta$ : 192.4, 164.6, 148.4, 138.2, 133.5, 132.8, 132.7, 130.9, 129.6, 128.2, 123.6, 94.9, 59.5, 13.5.

**HRMS** (ESI-TOF, [M + Na]<sup>+</sup>): calcd for C<sub>40</sub>H<sub>32</sub>N<sub>4</sub>O<sub>6</sub>NaBr<sub>2</sub>S<sub>2</sub>, 909.0028; found, 909.0042.

**Diethyl 5,5'-disulfanediyldis(2-amino-4-benzoyl-1-(4-(trifluoromethyl)phenyl)-1H-pyrrole-3-carboxylate) (3x)**

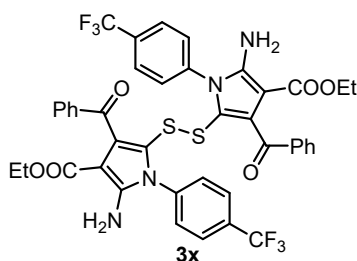

Isolated yield: 60% (80 mg), yellow solid, mp: 142-144 °C.

**IR (KBr)**  $\nu$  3446, 3063, 2981, 1674, 1526, 1493, 1386, 1282.

**<sup>1</sup>H NMR** (CDCl<sub>3</sub>, 500 MHz)  $\delta$ : 7.92 (d,  $J$  = 5.7 Hz, 2H), 7.67 (s, 2H), 7.48 (s, 2H), 7.31 (s, 3H), 5.19 (s, 2H), 3.93 (s, 2H), 0.72 (s, 3H).

**<sup>13</sup>C NMR** (CDCl<sub>3</sub>, 125 MHz)  $\delta$ : 192.1, 164.4, 148.1, 137.9, 136.8, 133.6, 132.7, 131.2 (d, <sup>2</sup>J<sub>C-F</sub> = 32.9 Hz), 129.4, 128.1, 126.5, 123.5 (d, <sup>1</sup>J<sub>C-F</sub> = 273.2 Hz), 95.0, 59.5, 13.4.

**<sup>19</sup>F NMR** (376 MHz, CDCl<sub>3</sub>)  $\delta$ : 62.70.

**HRMS** (ESI-TOF, [M + Na]<sup>+</sup>): calcd for C<sub>42</sub>H<sub>32</sub>N<sub>4</sub>O<sub>6</sub>NaS<sub>2</sub>F<sub>6</sub>, 889.1565; found,



889.1558.

**Ethyl 2-amino-4-benzoyl-5-mercapto-1-(4-(trifluoromethyl)phenyl)-1H-pyrrole-3-carboxylate (3x')**

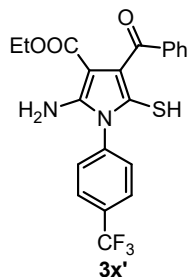

Isolated yield: 12% (8 mg) yellow solid, mp: 142-144 °C.

**IR (KBr)**  $\nu$  3423, 3065, 2979, 1667, 1540, 1498, 1376, 1279.

**<sup>1</sup>H NMR** (CDCl<sub>3</sub>, 500 MHz)  $\delta$ : 7.96 (d,  $J$  = 8.0 Hz, 2H), 7.70 (d,  $J$  = 7.3 Hz, 2H), 7.60 (d,  $J$  = 7.9 Hz, 2H), 7.39 (t,  $J$  = 7.3 Hz, 1H), 7.33 (t,  $J$  = 7.3 Hz, 2H), 6.03 (s, 1H), 5.58 (s, 2H), 4.29 (q,  $J$  = 6.9 Hz, 2H), 1.35 (t,  $J$  = 7.0 Hz, 3H).

**<sup>13</sup>C NMR** (CDCl<sub>3</sub>, 125 MHz)  $\delta$ : 184.5, 164.7, 160.5, 149.4, 138.8, 137.3, 133.1 (d,  $^2J_{C-F}$  = 32.6 Hz), 130.9, 129.2, 128.4, 128.2, 126.9, 123.2 (d,  $^1J_{C-F}$  = 272.3 Hz), 90.0, 81.5, 60.3, 14.5.

**HRMS** (ESI-TOF, [M + Na]<sup>+</sup>): calcd for C<sub>21</sub>H<sub>17</sub>N<sub>2</sub>O<sub>3</sub>NaSF<sub>3</sub>, 457.0810; found, 457.0809.

**Diethyl 5,5'-disulfanediylbis(2-amino-4-benzoyl-1-(3-chlorophenyl)-1H-pyrrole-3-carboxylate) (3y)**

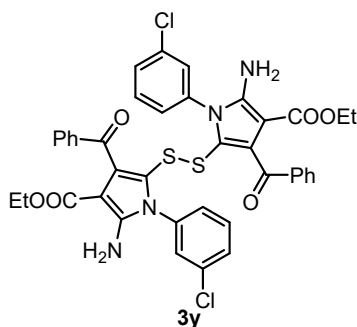

Isolated yield: 48% (59 mg), yellow solid, mp: 170-172 °C.

**IR (KBr)**  $\nu$  3445, 3064, 2978, 1671, 1494, 1383, 1283.

**<sup>1</sup>H NMR** (CDCl<sub>3</sub>, 500 MHz)  $\delta$ : 7.93 (s, 2H), 7.46 (s, 1H), 7.38 (s, 2H), 7.28 (s, 2H), 7.11 (s, 2H), 5.23 (s, 2H), 3.94 (s, 2H), 0.74 (s, 3H).

$^{13}\text{C}$  NMR ( $\text{CDCl}_3$ , 125 MHz)  $\delta$ : 192.3, 164.4, 148.1, 138.0, 135.0, 134.8, 132.5, 130.3, 129.4, 128.0, 127.4, 94.9, 59.4, 13.5.

HRMS (ESI-TOF,  $[\text{M} + \text{Na}]^+$ ): calcd for  $\text{C}_{40}\text{H}_{32}\text{N}_4\text{O}_6\text{NaS}_2\text{Cl}_2$ , 821.1038; found, 821.1041.

**Diethyl 5,5'-disulfanediylbis(2-amino-4-(4-methylbenzoyl)-1-(4-(trifluoromethyl)phenyl)-1H-pyrrole-3-carboxylate) (3z)**

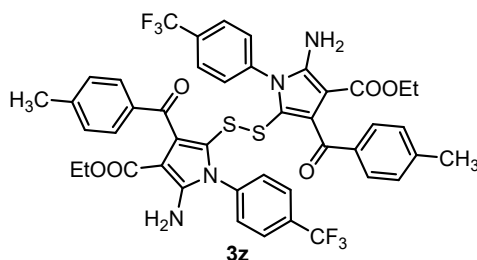

Isolated yield: 75% (103 mg), yellow solid, mp: 150-152 °C.

IR (KBr)  $\nu$  3442, 2982, 1673, 1526, 1489, 1385, 1238.

$^1\text{H}$  NMR ( $\text{CDCl}_3$ , 500 MHz)  $\delta$ : 7.82 (s, 2H), 7.66 (s, 2H), 7.32 (s, 2H), 7.11 (s, 2H), 5.21 (s, 2H), 3.96 (s, 2H), 2.37 (s, 3H), 0.76 (s, 3H).

$^{13}\text{C}$  NMR ( $\text{CDCl}_3$ , 125 MHz)  $\delta$ : 191.8, 164.5, 148.1, 143.6, 136.9, 135.6, 133.8, 129.6, 128.8, 126.5, 123.5 (d,  $^1J_{\text{C-F}} = 271.3$  Hz), 94.9, 59.7, 21.9, 13.6.

$^{19}\text{F}$  NMR (376 MHz,  $\text{CDCl}_3$ )  $\delta$ : 62.70 (d,  $J = 8.7$  Hz).

HRMS (ESI-TOF,  $[\text{M} + \text{Na}]^+$ ): calcd for  $\text{C}_{44}\text{H}_{36}\text{N}_4\text{O}_6\text{NaS}_2\text{F}_6$ , 917.1878; found, 917.1870.

**Diethyl 5,5'-disulfanediylbis(2-amino-4-(4-chlorobenzoyl)-1-(p-tolyl)-1H-pyrrole-3-carboxylate) (3aa)**

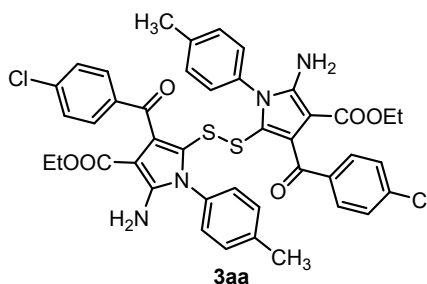

Isolated yield: 63% (80 mg), yellow solid, mp: 134-136 °C.

IR (KBr)  $\nu$  3462, 2979, 1672, 1520, 1481, 1384, 1279.

$^1\text{H}$  NMR ( $\text{CDCl}_3$ , 500 MHz)  $\delta$ : 7.88 (d,  $J = 8.5$  Hz, 2H), 7.27 (d,  $J = 8.5$  Hz, 2H),

7.18 (s, 2H), 7.02 (s, 2H), 5.16 (s, 2H), 3.96 (d,  $J = 6.7$  Hz, 2H), 2.37 (s, 3H), 0.80 (s, 3H).

$^{13}\text{C}$  NMR ( $\text{CDCl}_3$ , 125 MHz)  $\delta$ : 191.3, 164.5, 148.5, 139.6, 138.9, 136.8, 132.2, 131.6, 131.0, 130.9, 130.2, 128.9, 128.4, 94.4, 59.6, 21.4, 13.8.

HRMS (ESI-TOF,  $[\text{M} + \text{Na}]^+$ ): calcd for  $\text{C}_{42}\text{H}_{36}\text{N}_4\text{O}_6\text{Cl}_2\text{NaS}_2$ , 849.1351; found, 849.1345.

**Diethyl 5,5'-disulfanediylbis(2-amino-4-benzoyl-1-benzyl-1H-pyrrole-3-carboxylate) (3ab)**

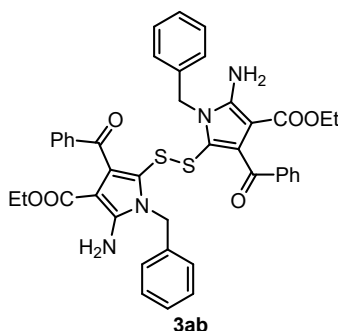

Isolated yield: 65% (76 mg), yellow solid, mp: 202-204 °C.

IR (KBr)  $\nu$  3428, 3027, 2985, 1673, 1582, 1456, 1355, 1226.

$^1\text{H}$  NMR ( $\text{CDCl}_3$ , 500 MHz)  $\delta$ : 7.80 (d,  $J = 7.6$  Hz, 2H), 7.45 (t,  $J = 7.0$  Hz, 1H), 7.30-7.26 (m, 5H), 7.12 (d,  $J = 7.3$  Hz, 2H), 5.05 (s, 4H), 3.87 (q,  $J = 6.7$  Hz, 2H), 0.70 (t,  $J = 6.7$  Hz, 3H).

$^{13}\text{C}$  NMR ( $\text{CDCl}_3$ , 125 MHz)  $\delta$ : 192.4, 164.7, 148.5, 138.3, 135.3, 132.7, 129.5, 129.3, 128.2, 126.8, 96.2, 59.5, 46.2, 13.6.

HRMS (ESI-TOF,  $[\text{M} + \text{Na}]^+$ ): calcd for  $\text{C}_{42}\text{H}_{38}\text{N}_4\text{O}_6\text{NaS}_2$ , 781.2130; found, 781.2132.

**Diethyl 5,5'-disulfanediylbis(2-amino-4-benzoyl-1-cyclohexyl-1H-pyrrole-3-carboxylate) (3ac)**

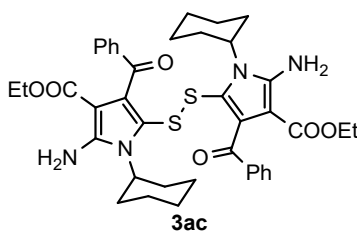

Isolated yield: 41% (47 mg), yellow solid, mp: 196-198 °C.

**IR (KBr)**  $\nu$  3435, 3063, 2979, 1667, 1545, 1482, 1384, 1257.

**<sup>1</sup>H NMR** (CDCl<sub>3</sub>, 500 MHz)  $\delta$ : 7.92 (d,  $J$  = 8.1 Hz, 1H), 7.84 (d,  $J$  = 7.6 Hz, 1H), 7.48 (q,  $J$  = 7.1 Hz, 1H), 7.38 (t,  $J$  = 7.6 Hz, 1H), 6.72 (s, 1H), 5.14 (s, 2H), 3.85 (q,  $J$  = 7.2 Hz, 2H), 3.74-3.68 (m, 1H), 2.05 (d,  $J$  = 12.2 Hz, 2H), 1.92 (d,  $J$  = 14.0 Hz, 2H), 1.76 (d,  $J$  = 13.3 Hz, 1H), 1.61-1.53 (m, 2H), 1.46-1.36 (m, 2H), 1.26-1.17 (m, 1H), 0.75 (t,  $J$  = 7.3 Hz, 3H).

**<sup>13</sup>C NMR** (CDCl<sub>3</sub>, 125 MHz)  $\delta$ : 192.2, 166.2, 145.5, 139.9, 138.0, 132.6, 131.7, 129.4, 127.8, 121.8, 117.1, 94.1, 59.1, 54.4, 33.1, 30.0, 25.7, 25.3, 13.7.

**HRMS** (ESI-TOF, [M + Na]<sup>+</sup>): calcd for C<sub>40</sub>H<sub>46</sub>N<sub>4</sub>O<sub>6</sub>NaS<sub>2</sub>, 765.2756; found, 765.2758.

**Diethyl 5,5'-disulfanediylbis(2-amino-1-phenyl-4-(phenylcarbamoyl)-1H-pyrrole-3-carboxylate) (3ad)**

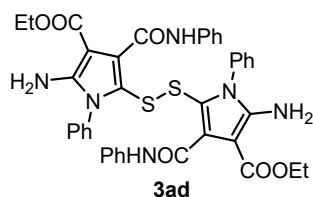

Isolated yield: 75% (88 mg), yellow solid, mp: 150-152 °C.

**IR (KBr)**  $\nu$  3470, 3059, 2979, 1671, 1522, 1498, 1384, 1254.

**<sup>1</sup>H NMR** (CDCl<sub>3</sub>, 500 MHz)  $\delta$ : 9.30 (s, 1H), 7.65 (d,  $J$  = 7.6 Hz, 2H), 7.40 (s, 3H), 7.32 (t,  $J$  = 7.9 Hz, 2H), 7.07 (t,  $J$  = 7.1 Hz, 3H), 4.97 (s, 2H), 4.12 (s, 2H), 1.17 (t,  $J$  = 7.1 Hz, 3H).

**<sup>13</sup>C NMR** (CDCl<sub>3</sub>, 125 MHz)  $\delta$ : 164.8, 163.0, 148.6, 139.2, 133.9, 130.1, 129.8, 129.6, 129.3, 128.9, 123.8, 119.8, 93.8, 60.1, 14.4.

**HRMS** (ESI-TOF, [M + Na]<sup>+</sup>): calcd for C<sub>40</sub>H<sub>36</sub>N<sub>6</sub>O<sub>6</sub>NaS<sub>2</sub>, 783.2035; found, 783.2034.

**5,5'-Disulfanediylbis(2-amino-4-benzoyl-1-phenyl-1H-pyrrole-3-carbonitrile)(3af)**

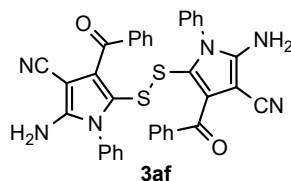

Isolated yield: 76% (75 mg), yellow solid, mp: 190-192 °C.

**IR (KBr)**  $\nu$  3469, 3062, 2188, 1634, 1556, 1473, 1335, 1227.

**<sup>1</sup>H NMR** (CDCl<sub>3</sub>, 500 MHz)  $\delta$ : 7.72-7.69 (m, 4H), 7.43 (d,  $J$  = 1.8 Hz, 1H), 7.42 (d,  $J$  = 1.2 Hz, 1H), 7.39 (d,  $J$  = 6.9 Hz, 1H), 7.34 (t,  $J$  = 7.4 Hz, 2H), 6.13 (s, 1H), 4.65 (s, 2H).

**<sup>13</sup>C NMR** (CDCl<sub>3</sub>, 125 MHz)  $\delta$ : 184.9, 161.1, 151.2, 138.4, 134.1, 131.6, 131.3, 128.4, 127.2, 115.1, 91.5, 61.7.

**HRMS** (ESI-TOF, [M + Na]<sup>+</sup>): calcd for C<sub>36</sub>H<sub>24</sub>N<sub>6</sub>O<sub>2</sub>NaS<sub>2</sub>, 659.1300; found, 659.1310.

**5,5'-Disulfanediylbis(2-amino-4-benzoyl-N,1-diphenyl-1H-pyrrole-3-carboxamide) (3ag)**

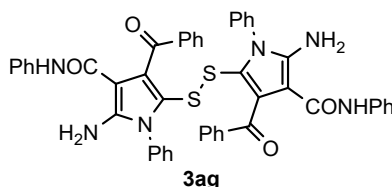

Isolated yield: 77% (98 mg), yellow solid, mp: 230-232 °C.

**IR (KBr)**  $\nu$  3429, 3058, 1649, 1557, 1481, 1386, 1295, 1225.

**<sup>1</sup>H NMR** (CDCl<sub>3</sub>, 500 MHz)  $\delta$ : 11.59 (s, 1H), 7.83 (d,  $J$  = 7.3 Hz, 2H), 7.53 (d,  $J$  = 7.4 Hz, 3H), 7.42 (t,  $J$  = 7.6 Hz, 1H), 7.36 (t,  $J$  = 7.6 Hz, 3H), 7.29 (t,  $J$  = 7.6 Hz, 2H), 7.19 (d,  $J$  = 5.5 Hz, 1H), 7.14-7.06 (m, 2H), 6.03 (d,  $J$  = 6.1 Hz, 1H), 5.96 (s, 2H).

**<sup>13</sup>C NMR** (CDCl<sub>3</sub>, 125 MHz)  $\delta$ : 193.1, 164.6, 150.6, 141.7, 139.4, 133.6, 132.8, 132.5, 130.1, 129.8, 129.4, 128.9, 128.5, 128.1, 123.3, 121.8, 120.5, 99.3.

**HRMS** (ESI-TOF, [M + Na]<sup>+</sup>): calcd for C<sub>48</sub>H<sub>36</sub>N<sub>6</sub>O<sub>4</sub>NaS<sub>2</sub>, 847.2132; found, 847.2137.

**Disulfanediylbis(5-amino-1-phenyl-1H-pyrrole-2,3,4-triyl)tetrakis(phenylmethanone) (3ah)**

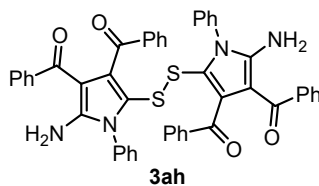

Isolated yield: 35% (43 mg), yellow solid, mp: 156-158 °C.

**IR (KBr)**  $\nu$  3458, 3057, 1653, 1498, 1393, 1276, 1234.

**<sup>1</sup>H NMR (500 MHz, CDCl<sub>3</sub>)** δ: 7.47–7.39 (m, 5H), 7.36 (t, J = 7.4 Hz, 1H), 7.23 (d, J = 7.8 Hz, 2H), 7.20 (s, 1H), 7.17 (dd, J = 13.5, 5.6 Hz, 4H), 7.03 (t, J = 7.6 Hz, 2H), 5.85 (s, 2H).

**<sup>13</sup>C NMR (CDCl<sub>3</sub>, 125 MHz)** δ: 191.5, 191.2, 150.1, 141.3, 138.7, 133.4, 132.7, 132.3, 130.5, 129.7, 129.6, 129.2, 128.0, 127.9, 127.7, 105.1.

**HRMS (ESI-TOF, [M + Na]<sup>+</sup>):** calcd for C<sub>48</sub>H<sub>34</sub>N<sub>4</sub>O<sub>4</sub>NaS<sub>2</sub>, 817.1919; found, 817.1918.

#### 4. Gram-scale reaction

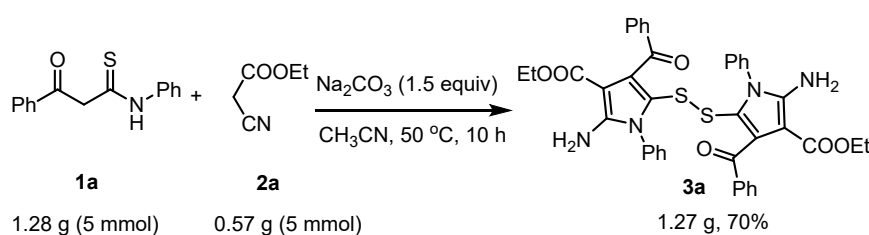

A gram-scale reaction was carried out by using β-benzoylthioamide **1a** (5 mmol) and ethyl cyanacetate **2a** (5 mmol) under the optimized conditions, the corresponding product **3a** was produced in 70% yield.

#### 5. Mechanism study

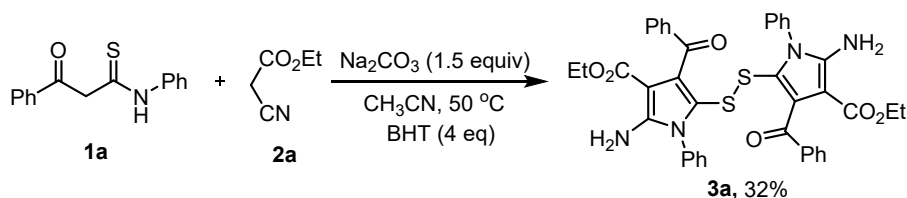

To a stirred solution of thioamides **1a** (0.3 mmol, 1.0 equiv) and ethyl 2-cyanoacetate **2a** (0.3 mmol, 1.0 equiv) in acetonitrile (1 mL) was added Na<sub>2</sub>CO<sub>3</sub> (0.45 mmol, 1.5 equiv) and BHT (1.2 mmol, 4.0 equiv), the mixture was stirred at 50 °C for 6 h. After completion of the reaction as monitored by TLC the solvent was concentrated under vacuum and the residue was purified by flash column chromatography on silica gel with petroleum ether/ethyl acetate (3:1, v/v) to produce **3a** in 32% yield.

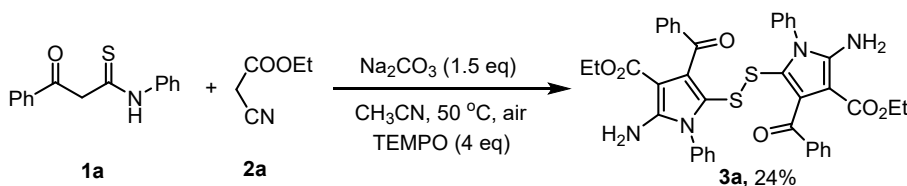

To a stirred solution of thioamides **1a** (0.3 mmol, 1.0 equiv) and ethyl 2-cyanoacetate **2a** (0.3 mmol, 1.0 equiv) in acetonitrile (1 mL) was added Na<sub>2</sub>CO<sub>3</sub> (0.45 mmol, 1.5 equiv) and TEMPO (1.2 mmol, 4.0 equiv), the mixture was stirred at 50 °C for 3 h. After completion of the reaction as monitored by TLC the solvent was concentrated under vacuum and the residue was purified by flash column chromatography on silica gel with petroleum ether/ethyl acetate (3:1, v/v) to produce **3a** in 24% yield.

## 6. Follow-up transformations

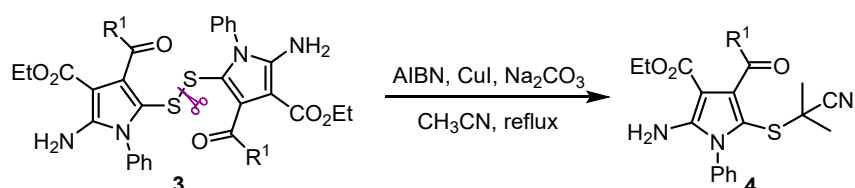

The mixture of disulfides **3** (0.15 mmol), AIBN (0.3 mmol), CuI (0.04 mmol), Na<sub>2</sub>CO<sub>3</sub> (0.3 mmol) and CH<sub>3</sub>CN (1 mL) was stirred at 100 °C for 3 h. After the completion of the reaction (monitored by TLC), the solvent was concentrated under vacuum and the residue was purified by flash column chromatography on silica gel with petroleum ether/ethyl acetate (3:1, v/v) as the eluent to give the product **4**.

### Ethyl 2-amino-4-(4-bromobenzoyl)-5-((2-cyanopropan-2-yl)thio)-1-phenyl-1H-pyrrole-3-carboxylate (**4a**)

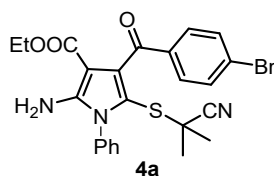

Isolated yield: 75% (115 mg) white solid, mp: 118-120 °C.

**IR (KBr)**  $\nu$  3447, 3063, 2978, 2231, 1674, 1521, 1496, 1385, 1278.

**<sup>1</sup>H NMR** (CDCl<sub>3</sub>, 500 MHz)  $\delta$ : 7.83 (d,  $J$  = 8.2 Hz, 2H), 7.61-7.56 (m, 4H), 7.53 (t,  $J$  = 7.3 Hz, 1H), 7.43 (d,  $J$  = 7.1 Hz, 2H), 5.36 (s, 2H), 3.94 (q,  $J$  = 7.1 Hz, 2H), 1.28 (s, 6H), 0.81 (t,  $J$  = 7.0 Hz, 3H).

**<sup>13</sup>C NMR** (CDCl<sub>3</sub>, 125 MHz)  $\delta$ : 191.8, 164.4, 148.2, 137.5, 133.8, 133.6, 131.7, 131.2, 130.0, 129.9, 129.4, 128.2, 122.0, 111.6, 94.4, 59.8, 41.4, 28.1, 13.8.

**HRMS** (ESI-TOF, [M + Na]<sup>+</sup>): calcd for C<sub>24</sub>H<sub>22</sub>N<sub>3</sub>O<sub>3</sub>NaSBr, 534.0463; found, 534.0464.

**Ethyl 2-Amino-5-((2-cyanopropan-2-yl)thio)-4-(4-methoxybenzoyl)-1-phenyl-1H-pyrrole-3-carboxylate (4b)**

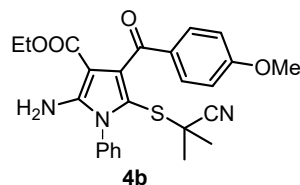

Isolated yield: 72% (100 mg), yellow solid, mp: 78-80 °C.

**IR (KBr)**  $\nu$  3446, 3063, 2976, 2230, 1671, 1521, 1454, 1384, 1279.

**<sup>1</sup>H NMR** (CDCl<sub>3</sub>, 500 MHz)  $\delta$ : 7.94 (d,  $J$  = 7.8 Hz, 2H), 7.58 (t,  $J$  = 7.5 Hz, 2H), 7.52 (t,  $J$  = 7.2 Hz, 1H), 7.44 (s, 2H), 6.92 (d,  $J$  = 8.2 Hz, 2H), 5.35 (s, 2H), 3.95 (d,  $J$  = 6.9 Hz, 2H), 3.87 (s, 3H), 1.28 (s, 6H), 0.82 (t,  $J$  = 7.0 Hz, 3H).

**<sup>13</sup>C NMR** (CDCl<sub>3</sub>, 125 MHz)  $\delta$ : 191.5, 164.5, 163.4, 148.0, 134.6, 133.6, 131.8, 131.7, 129.7, 129.5, 129.3, 122.0, 113.4, 110.6, 94.4, 59.5, 55.4, 41.1, 27.9, 13.6.

**HRMS** (ESI-TOF, [M + Na]<sup>+</sup>): calcd for C<sub>25</sub>H<sub>25</sub>N<sub>3</sub>O<sub>4</sub>SNa, 486.1463; found, 486.1469.

## 7. NMR spectra



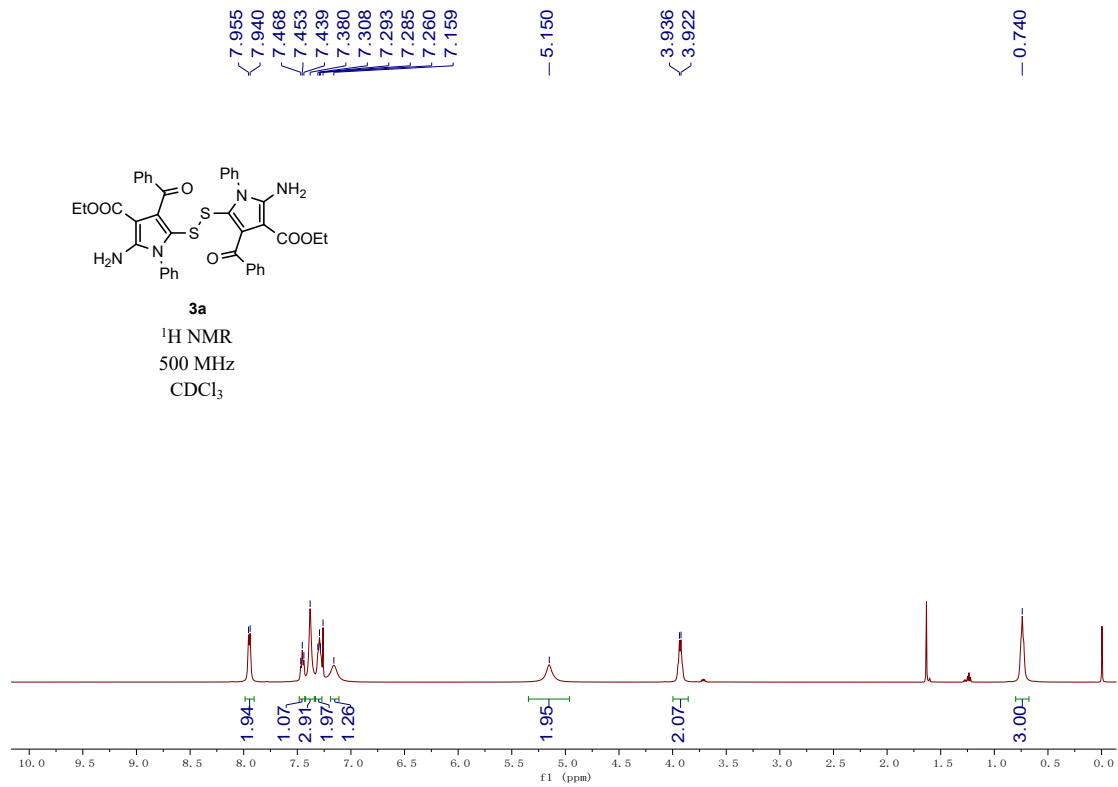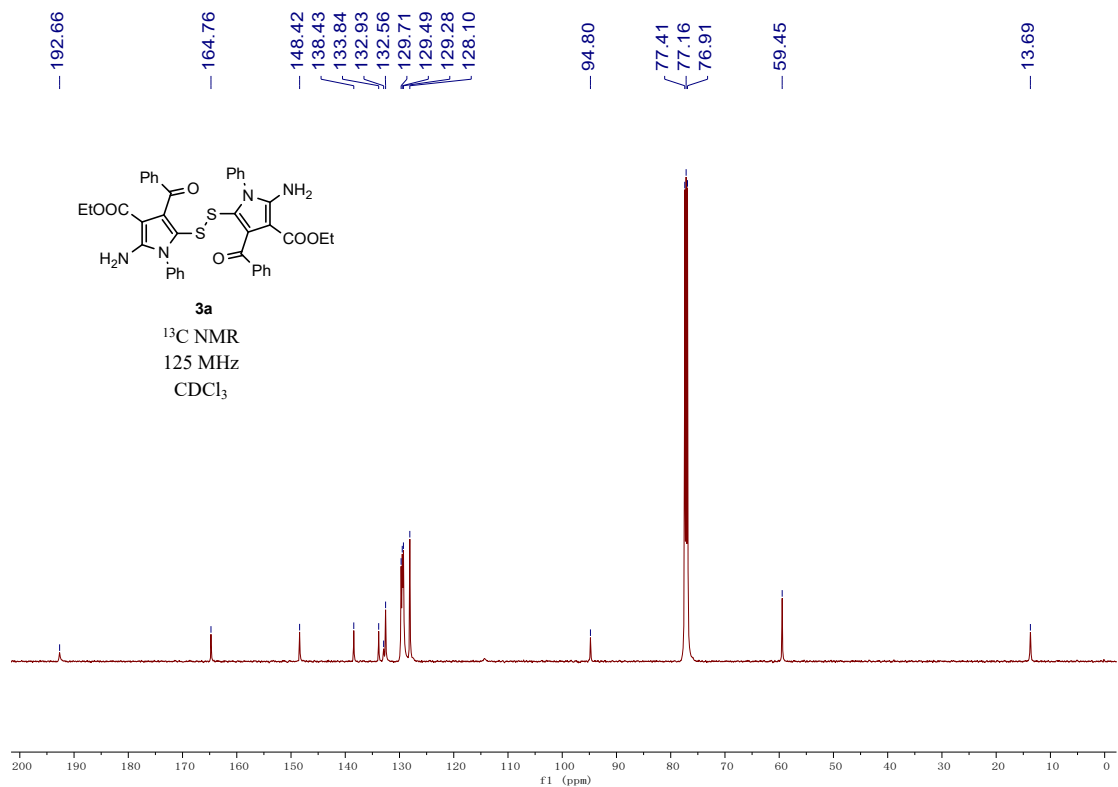

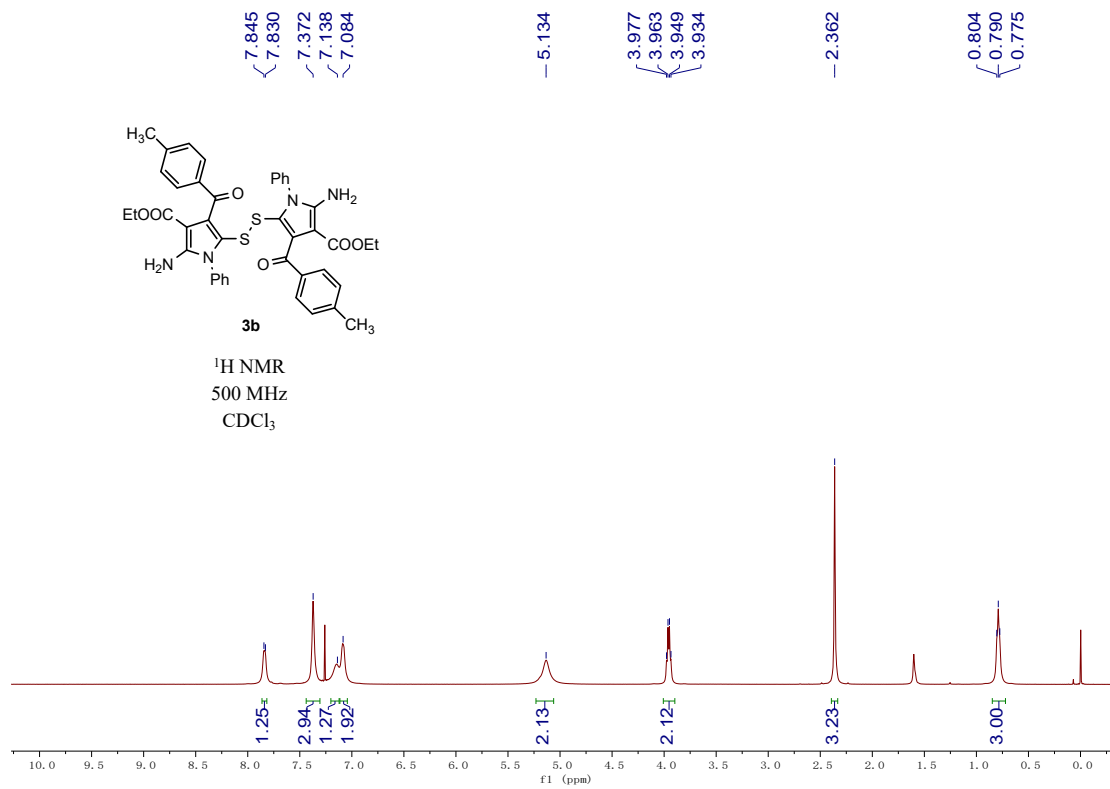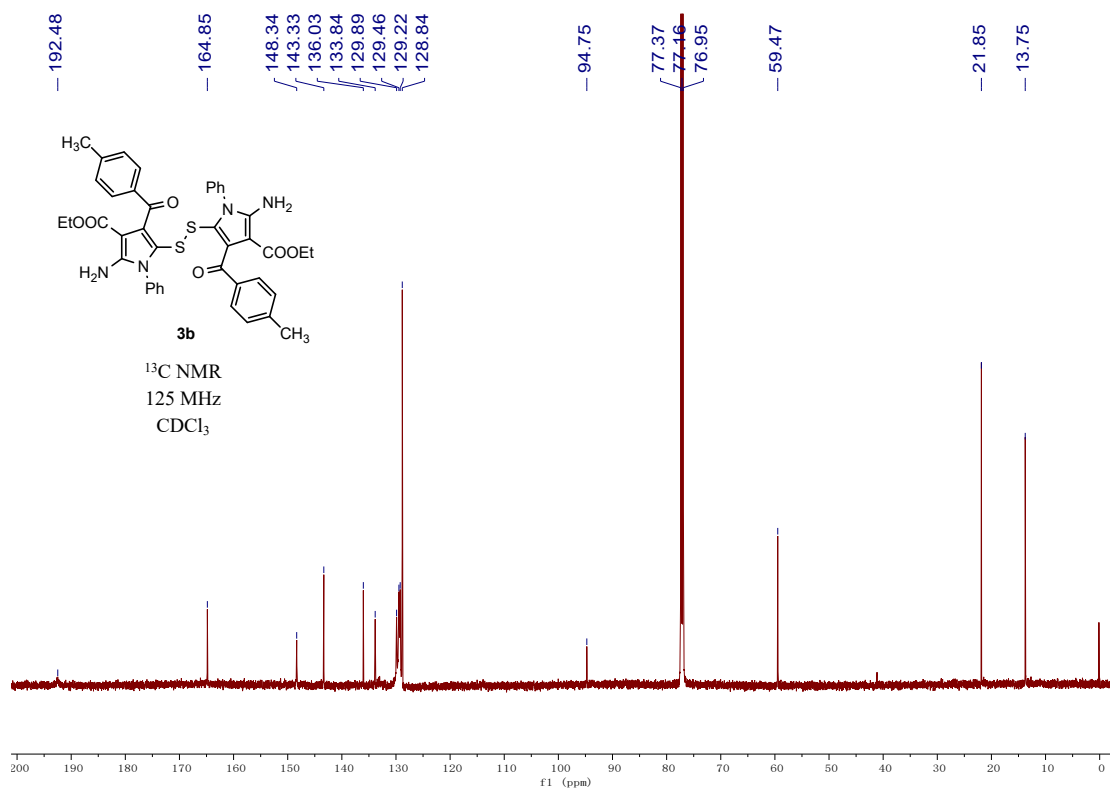

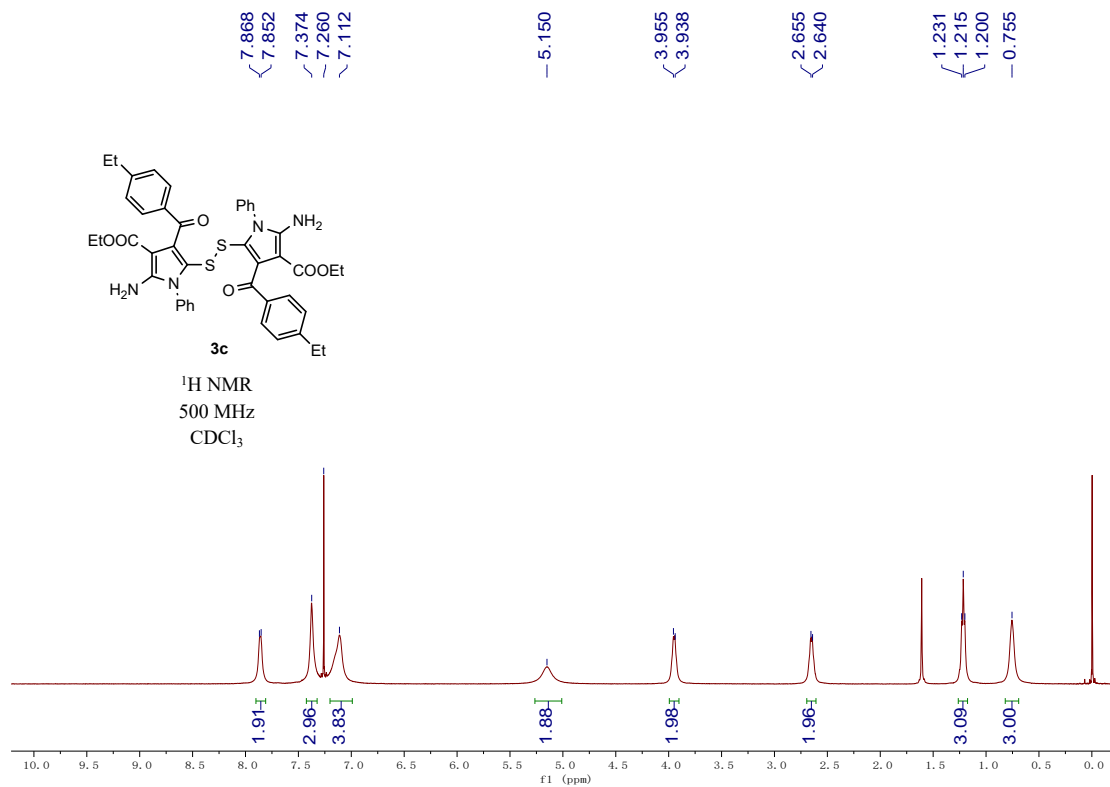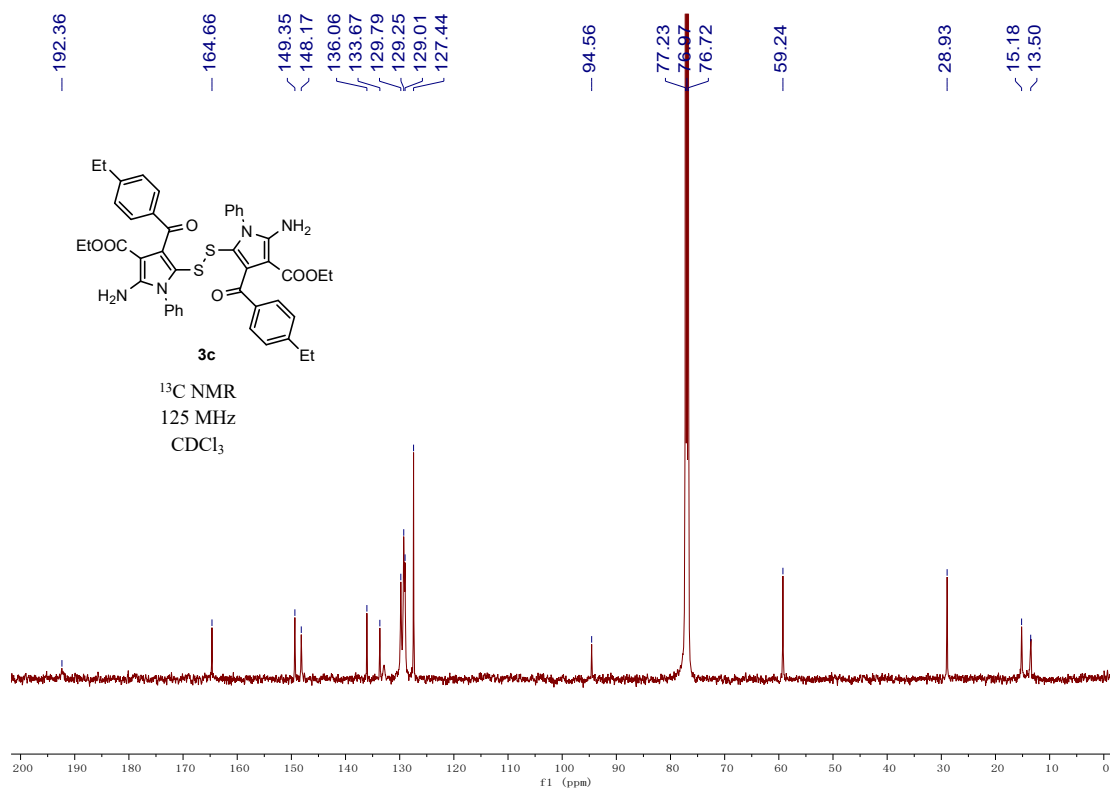

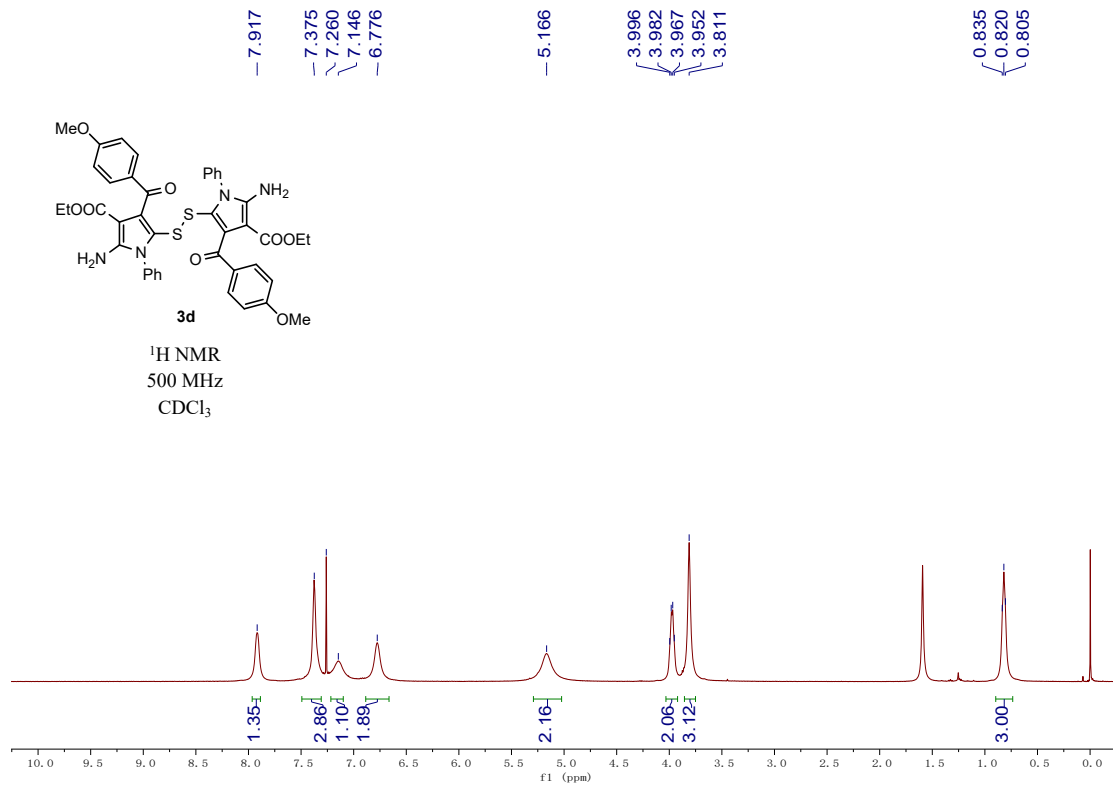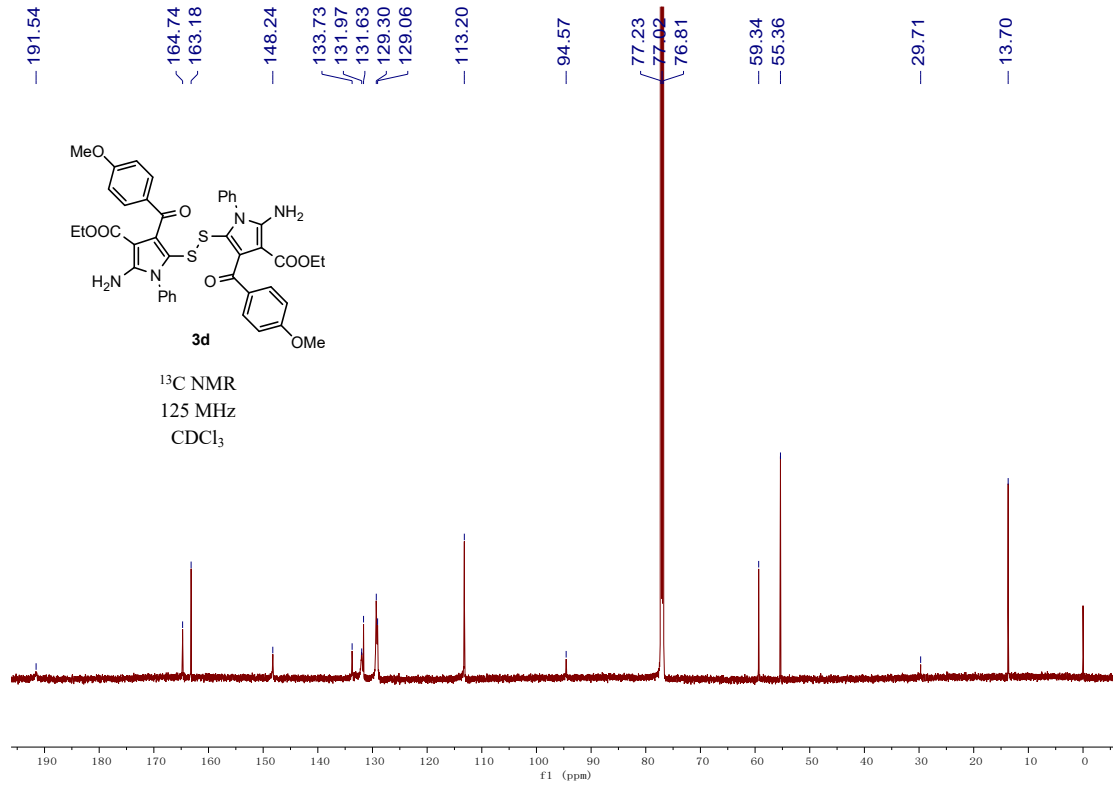

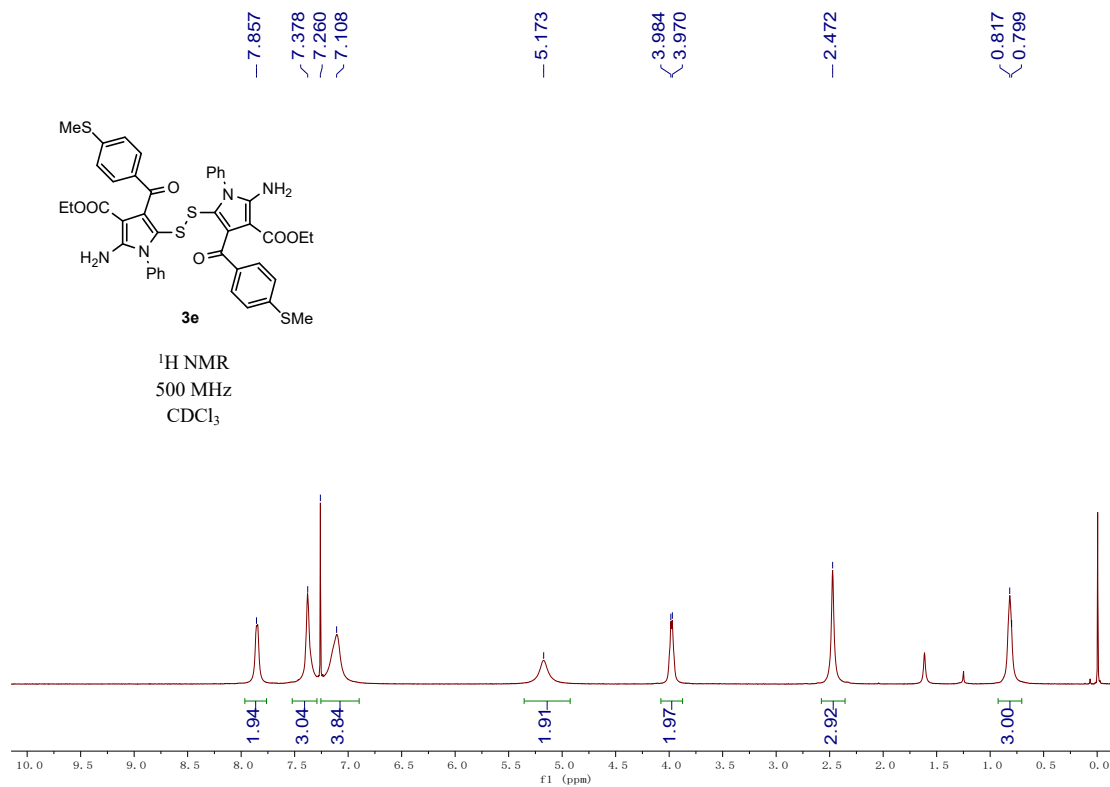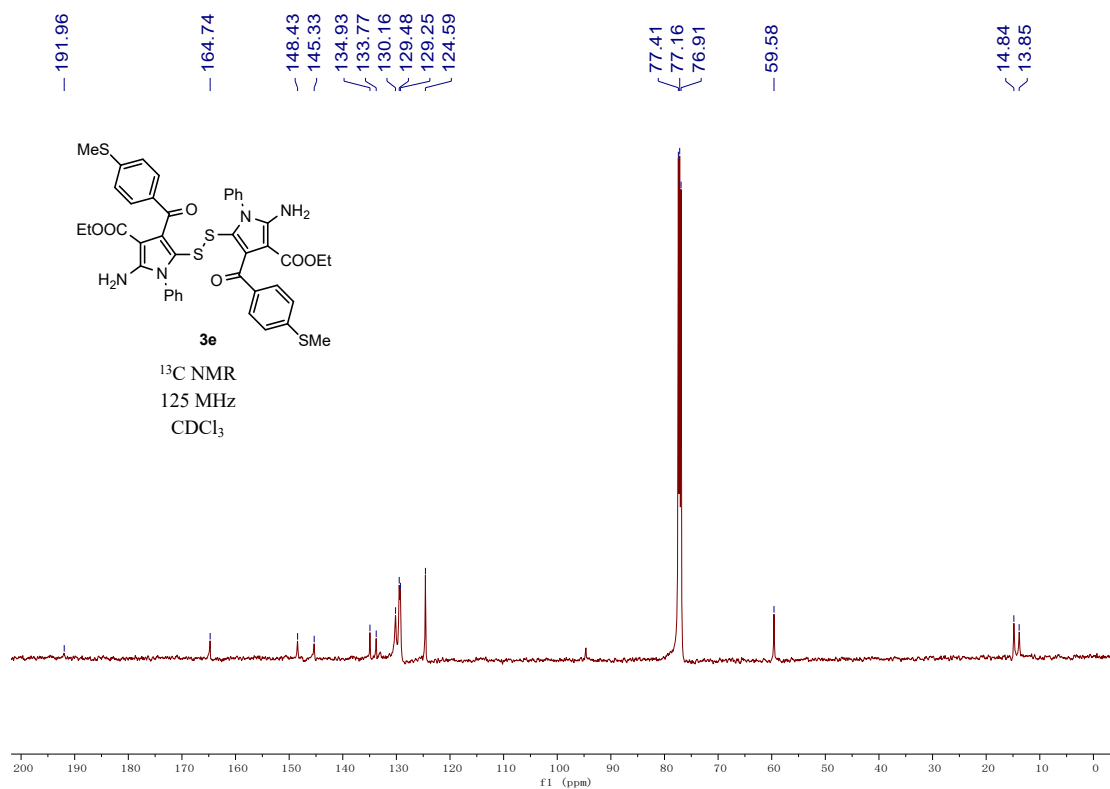

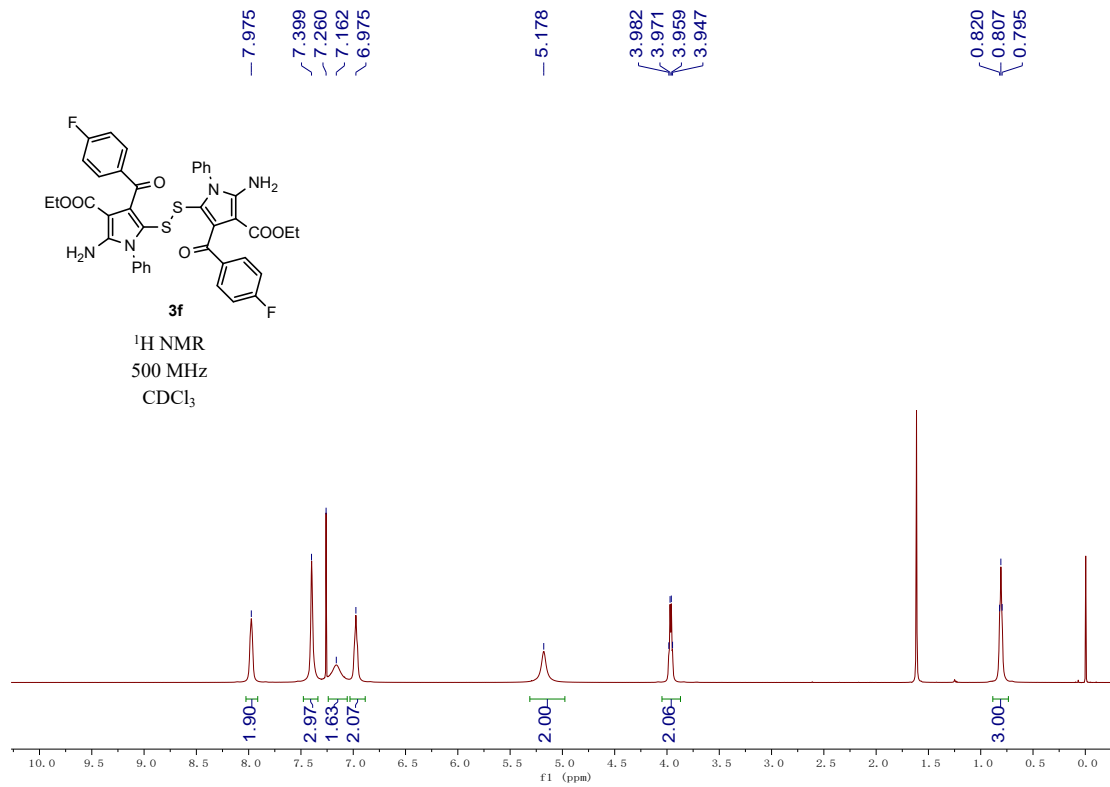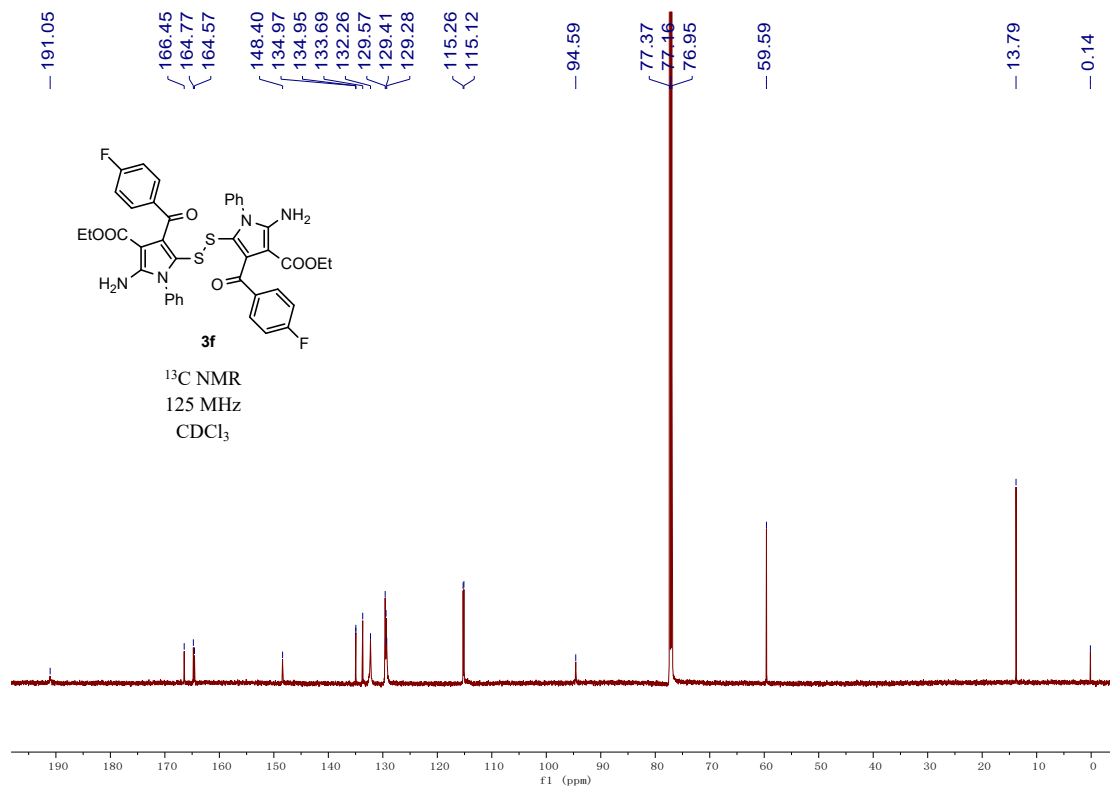

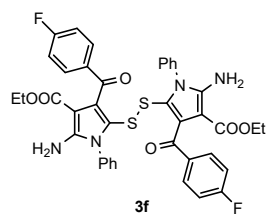

<sup>19</sup>F NMR  
376 MHz  
CDCl<sub>3</sub>

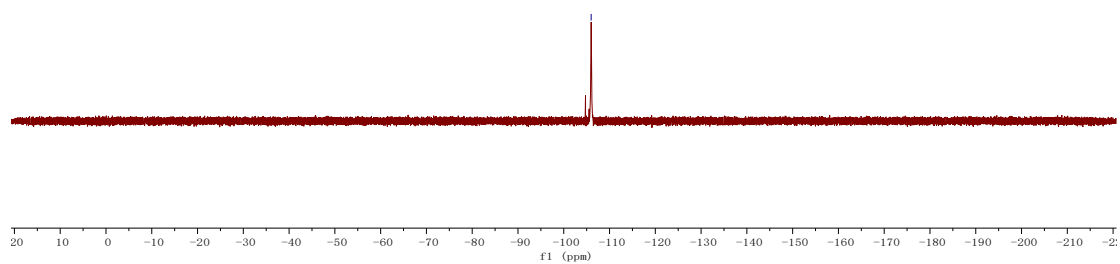

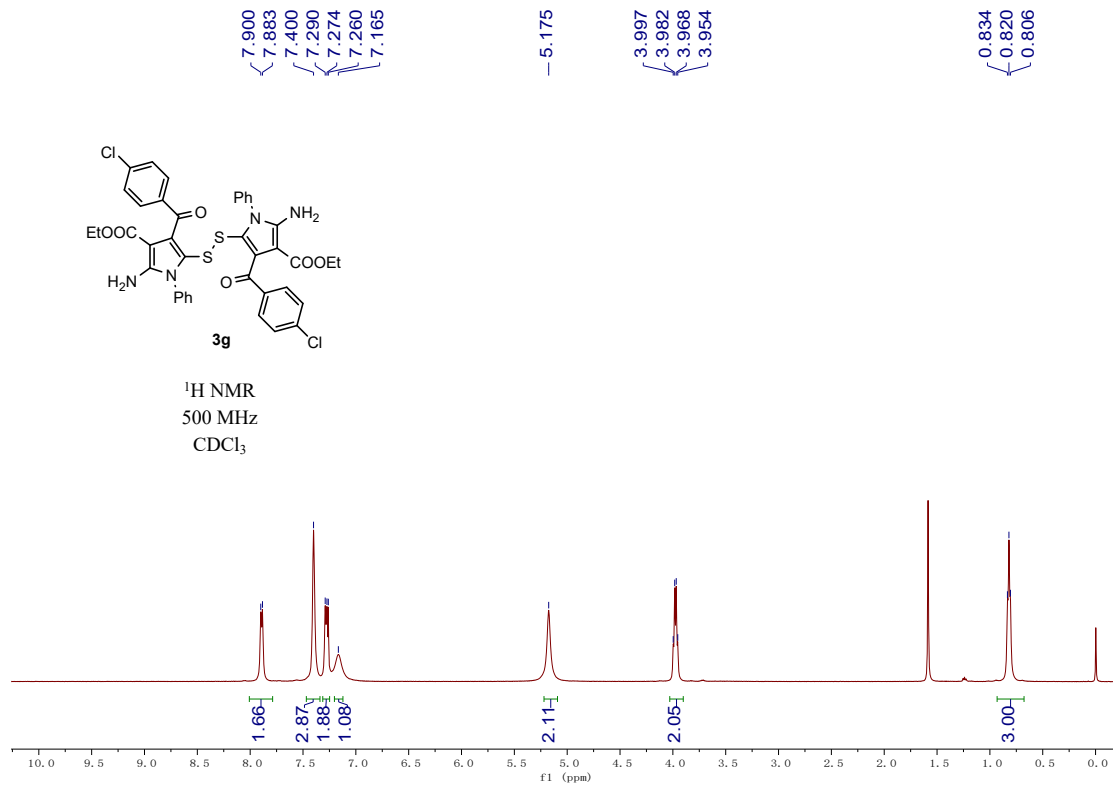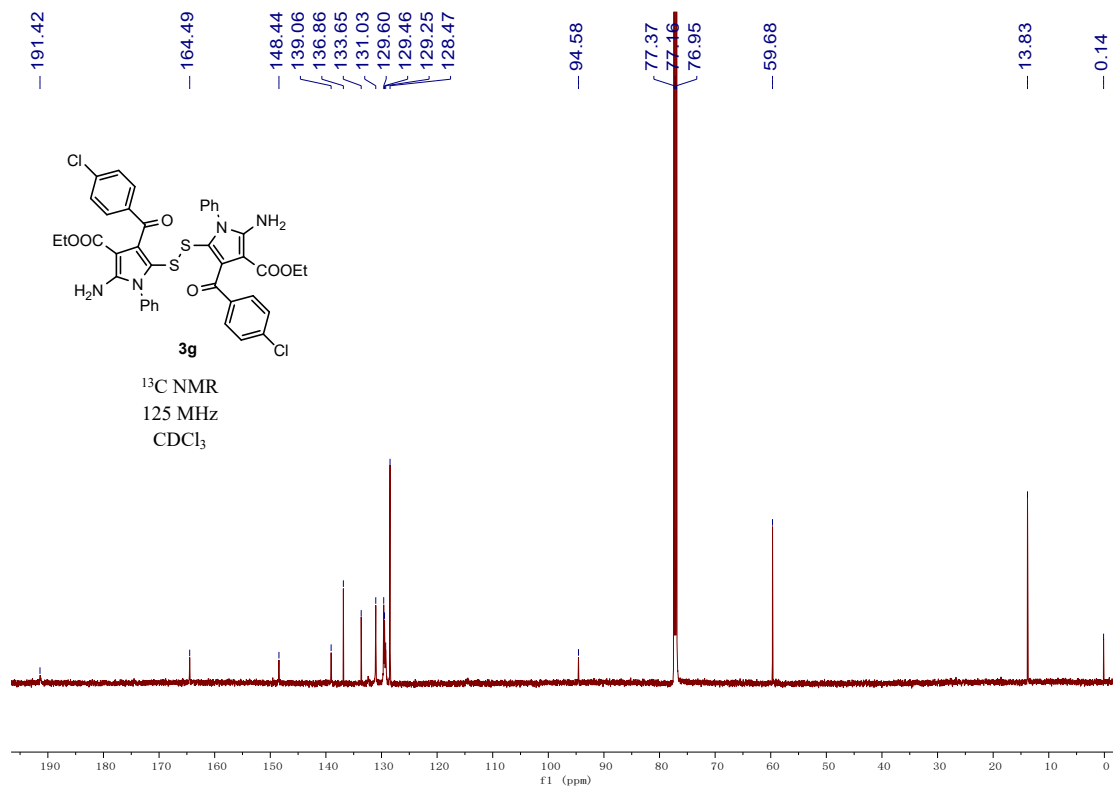



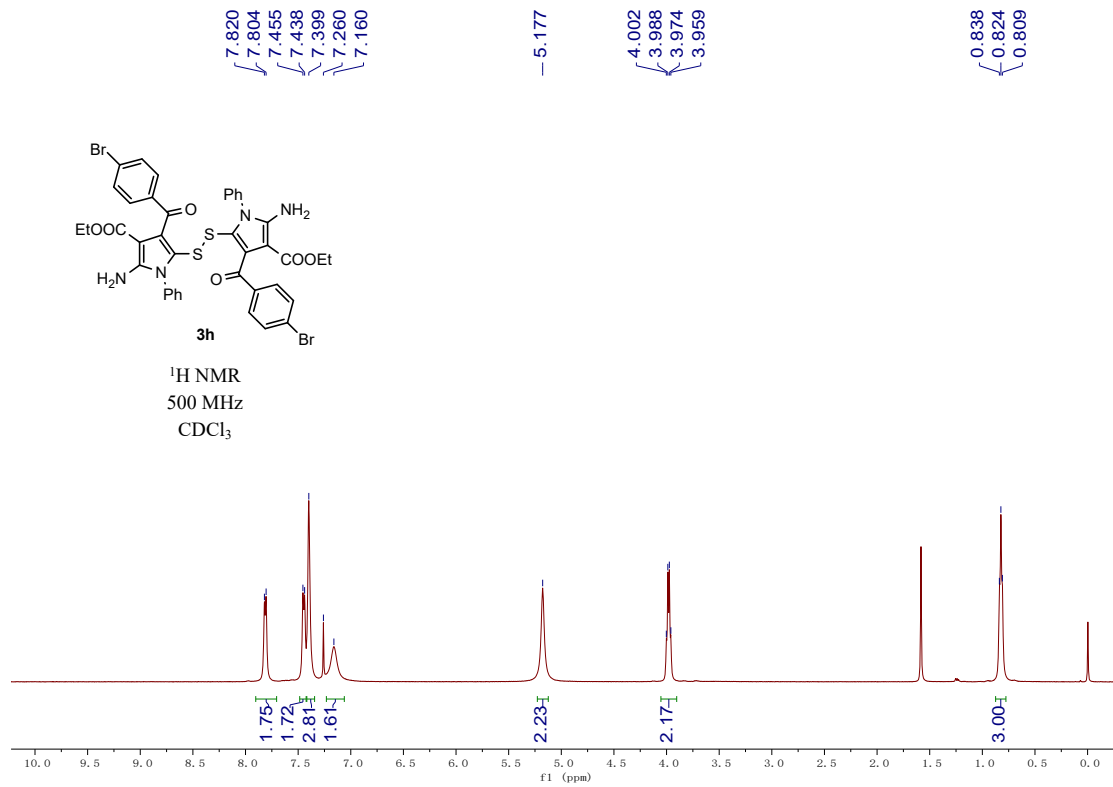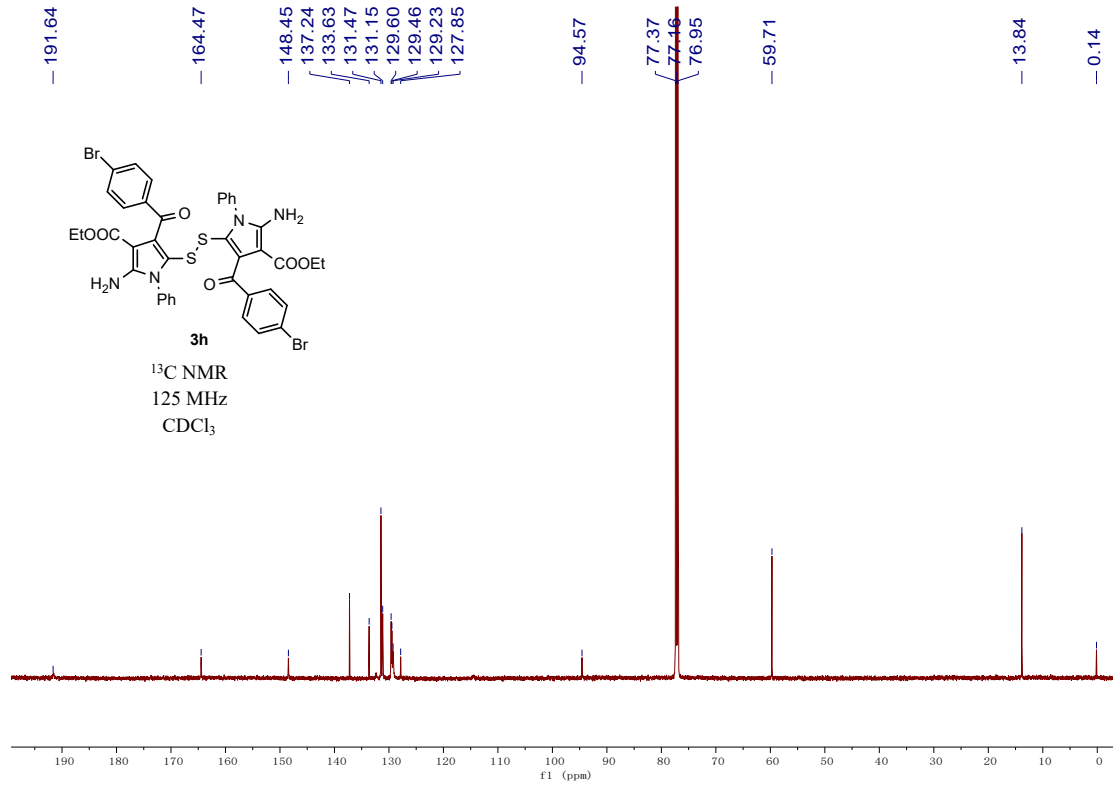

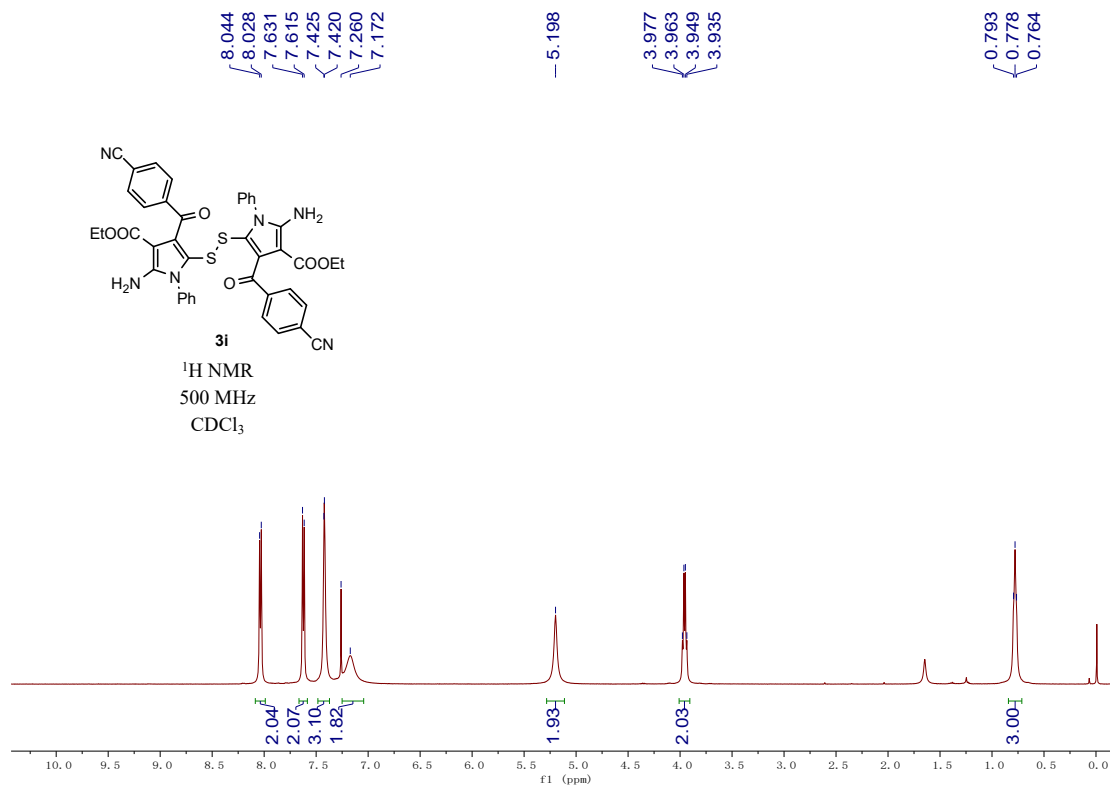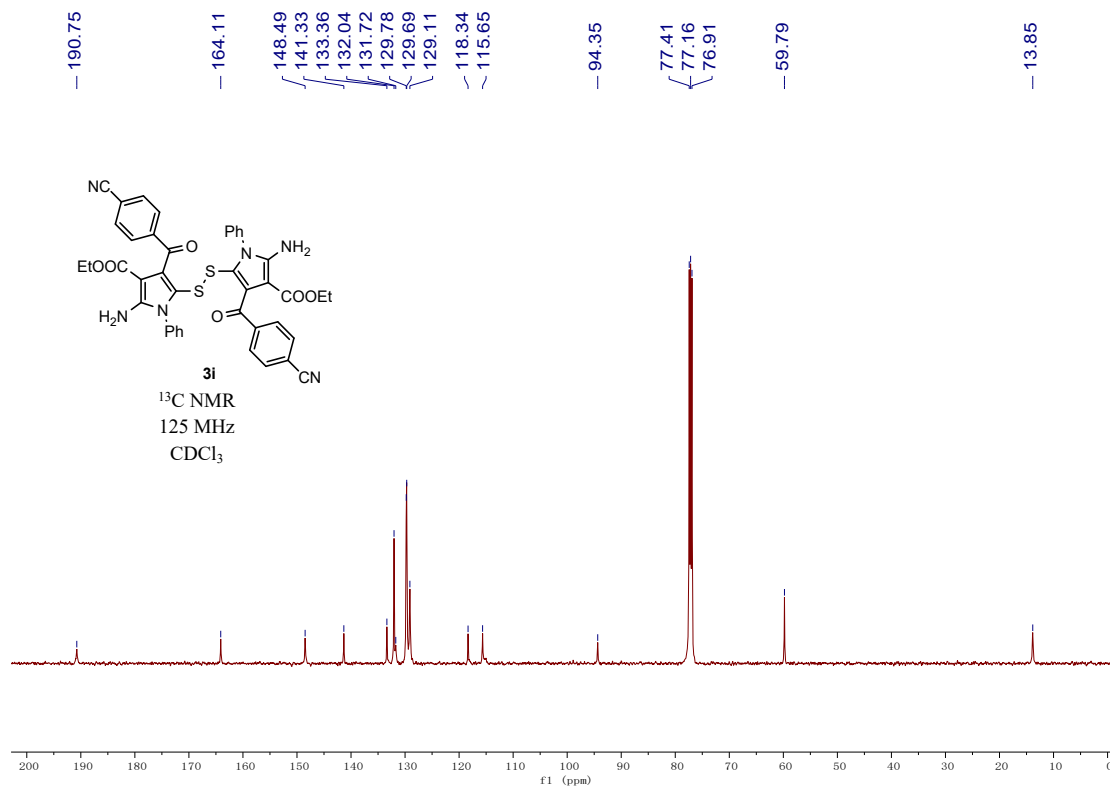

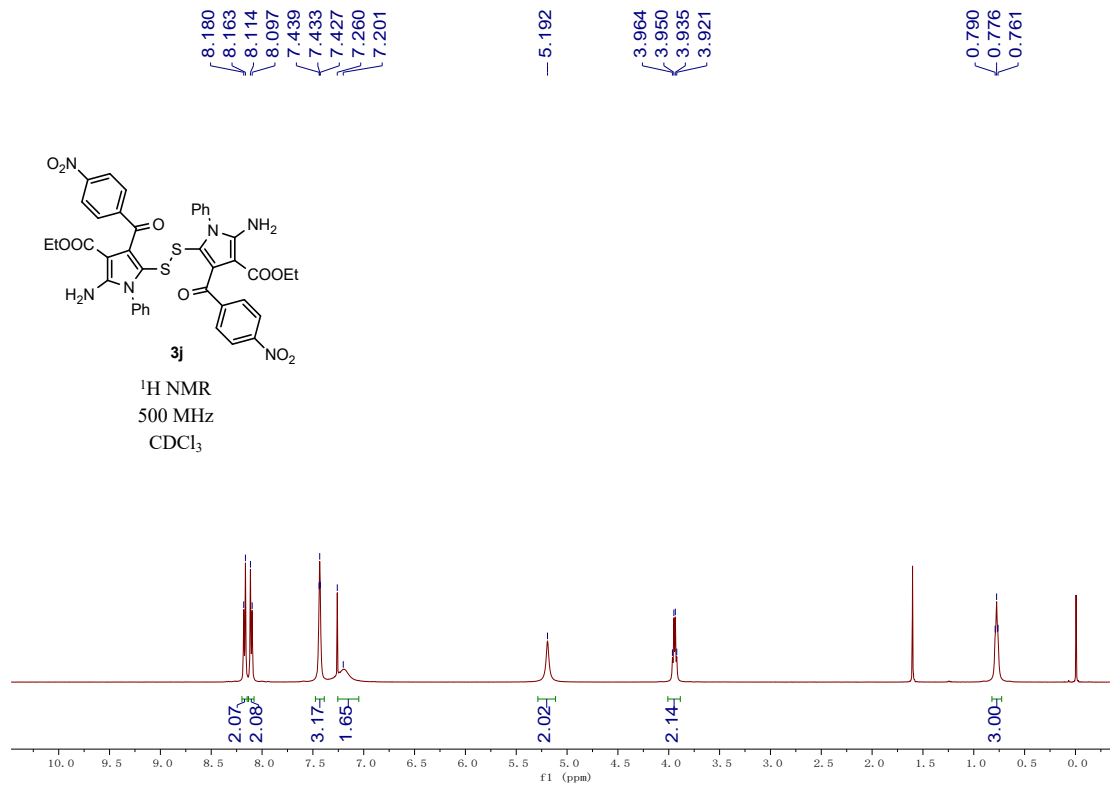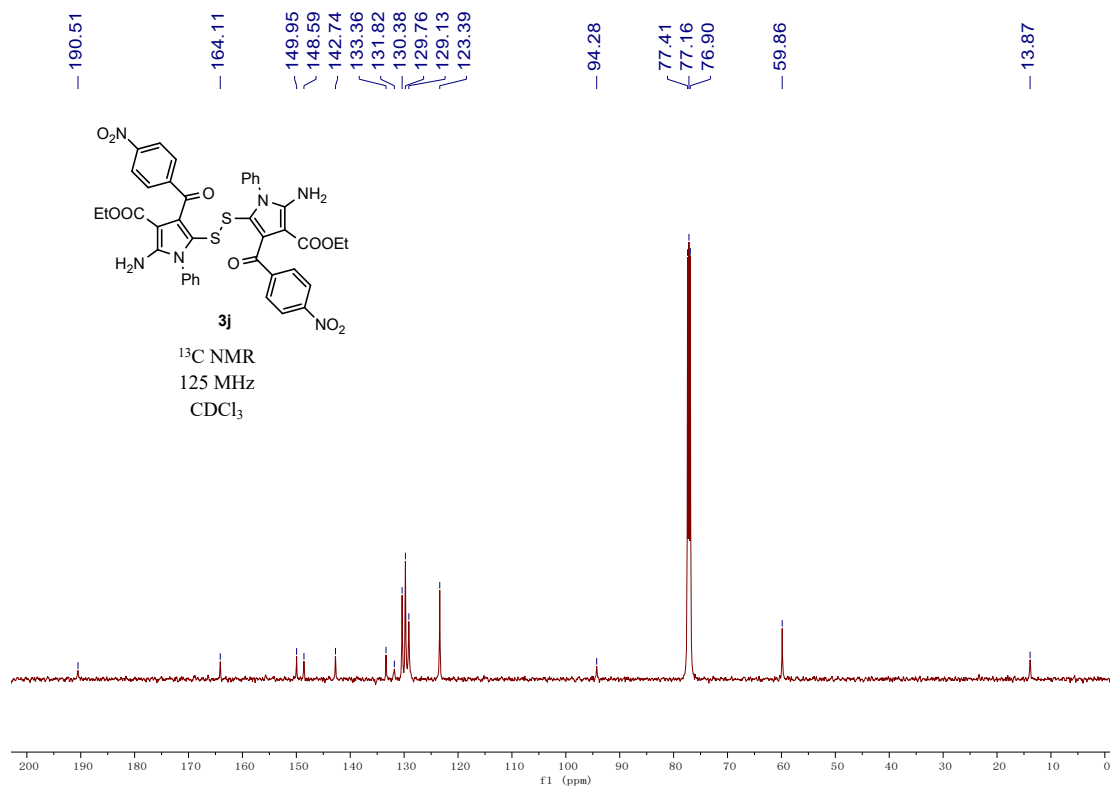

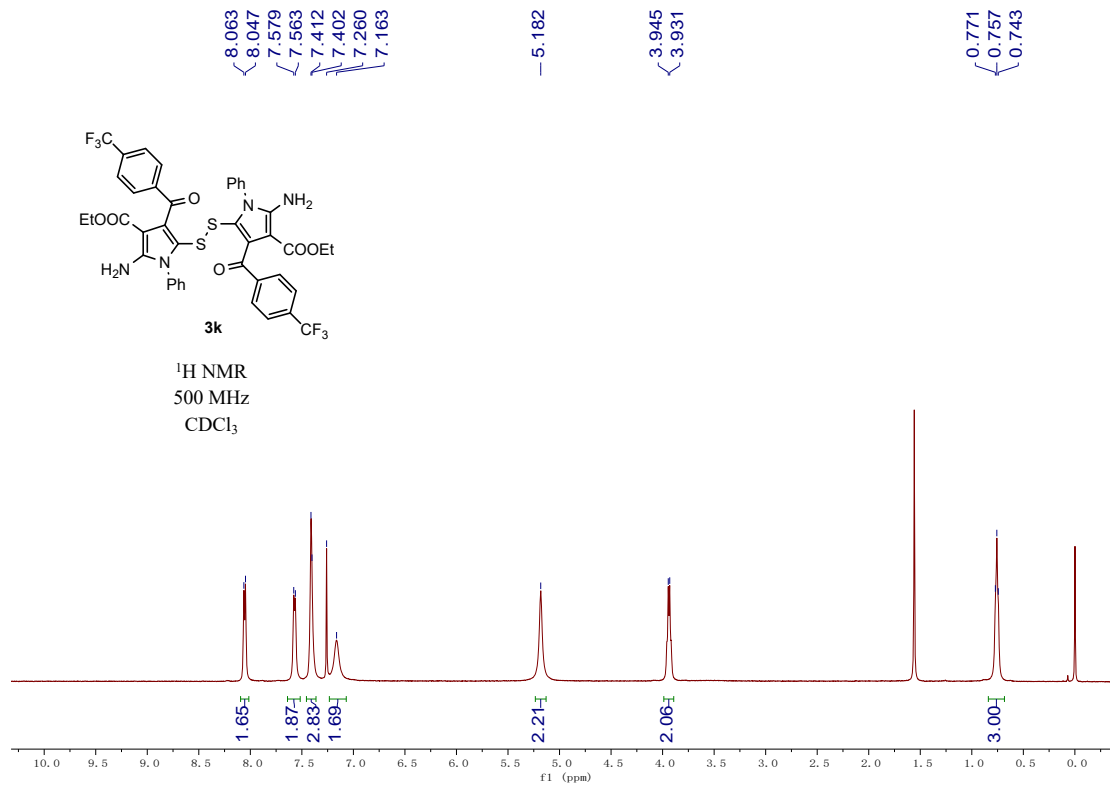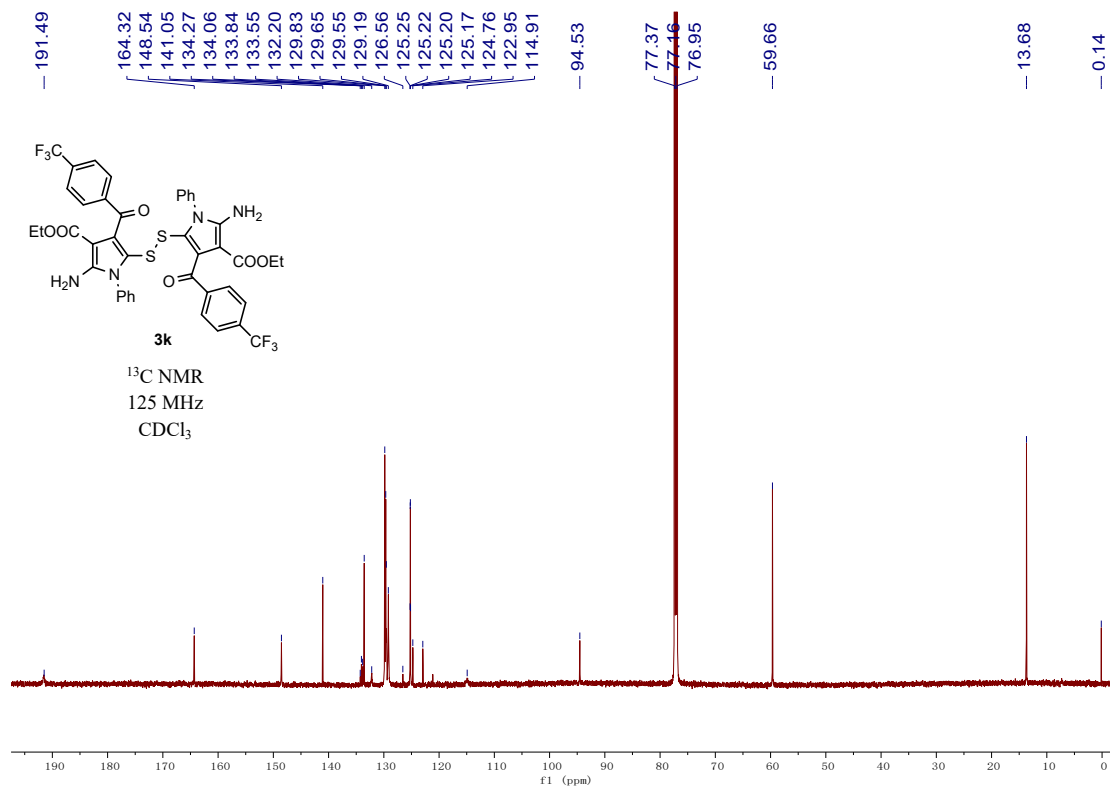



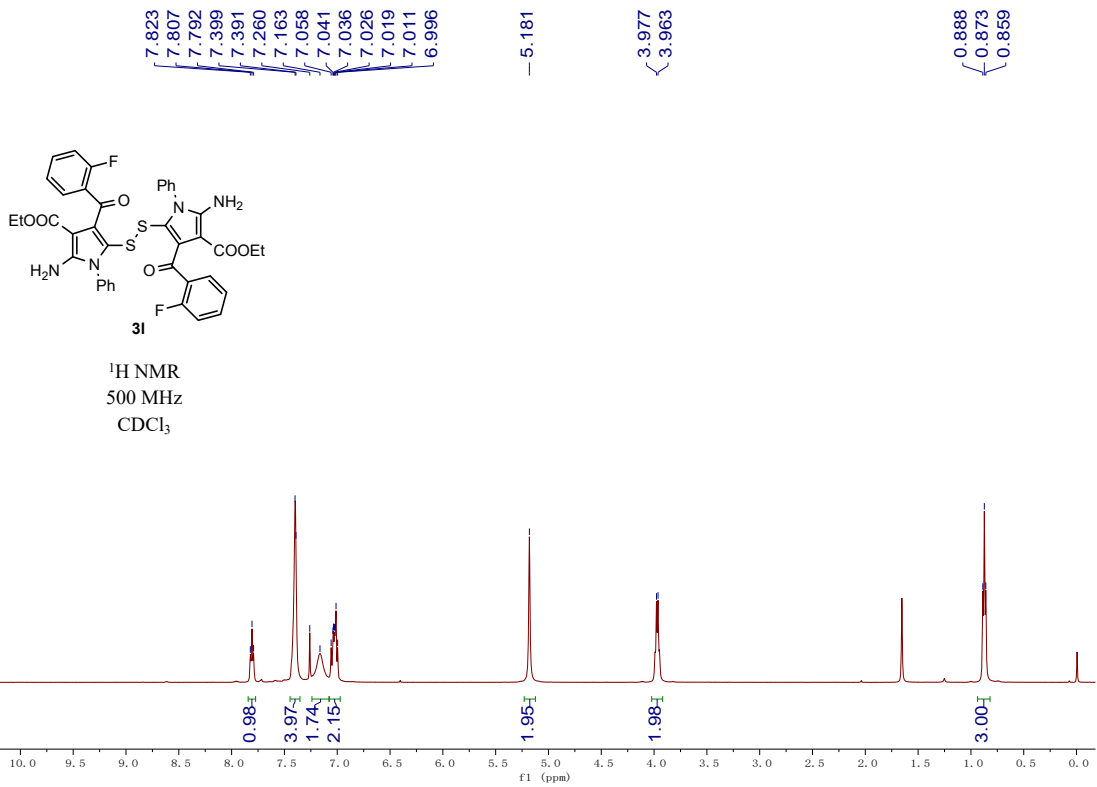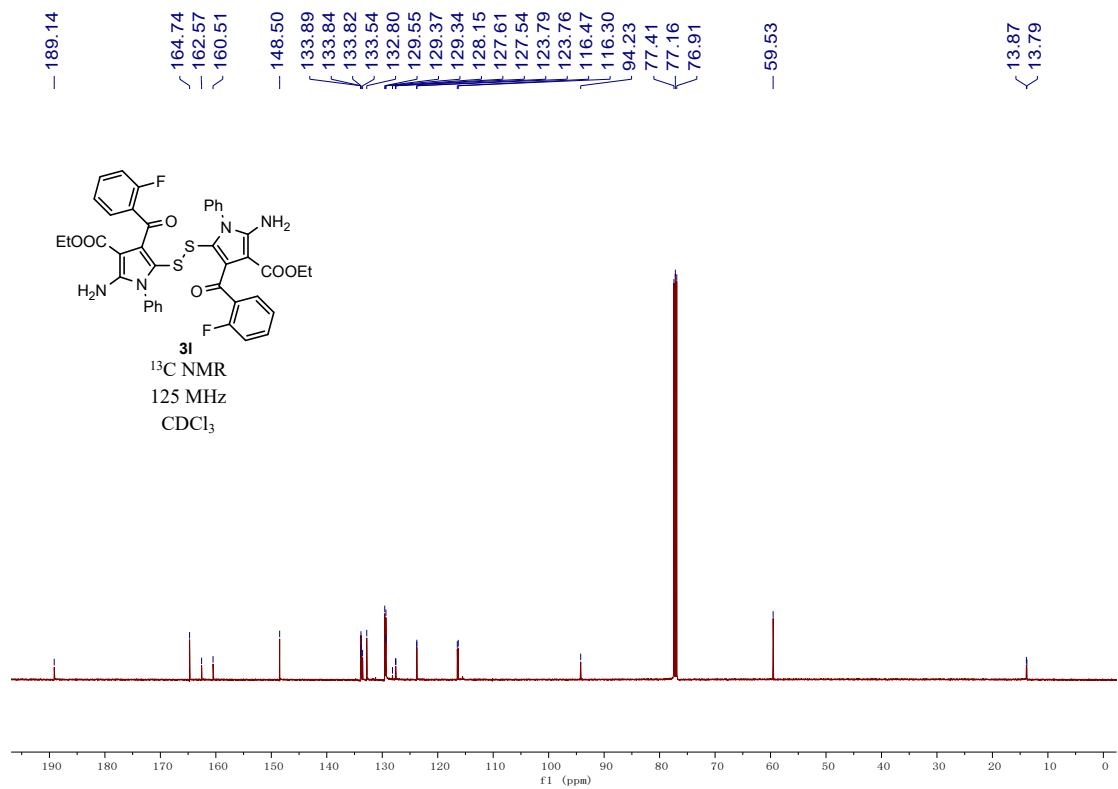

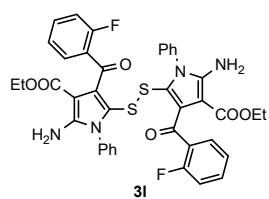

<sup>19</sup>F NMR  
376 MHz  
CDCl<sub>3</sub>

---112.824

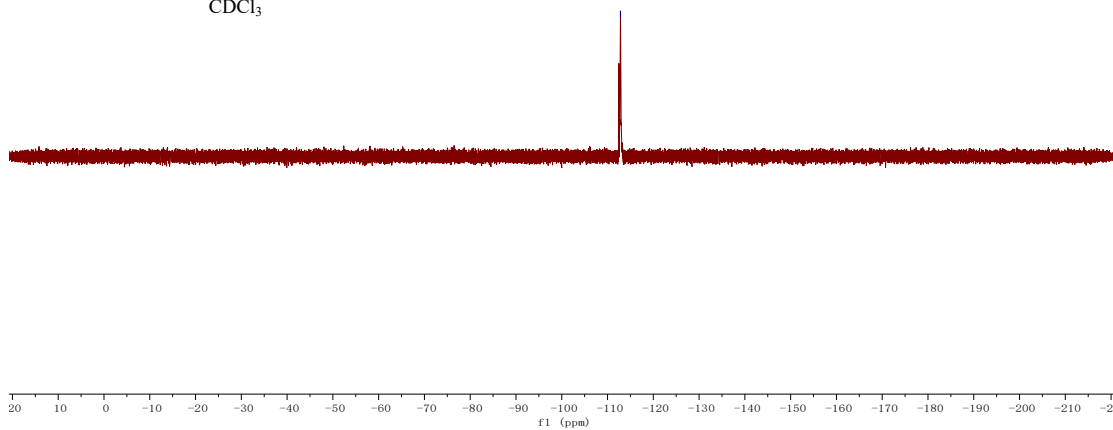

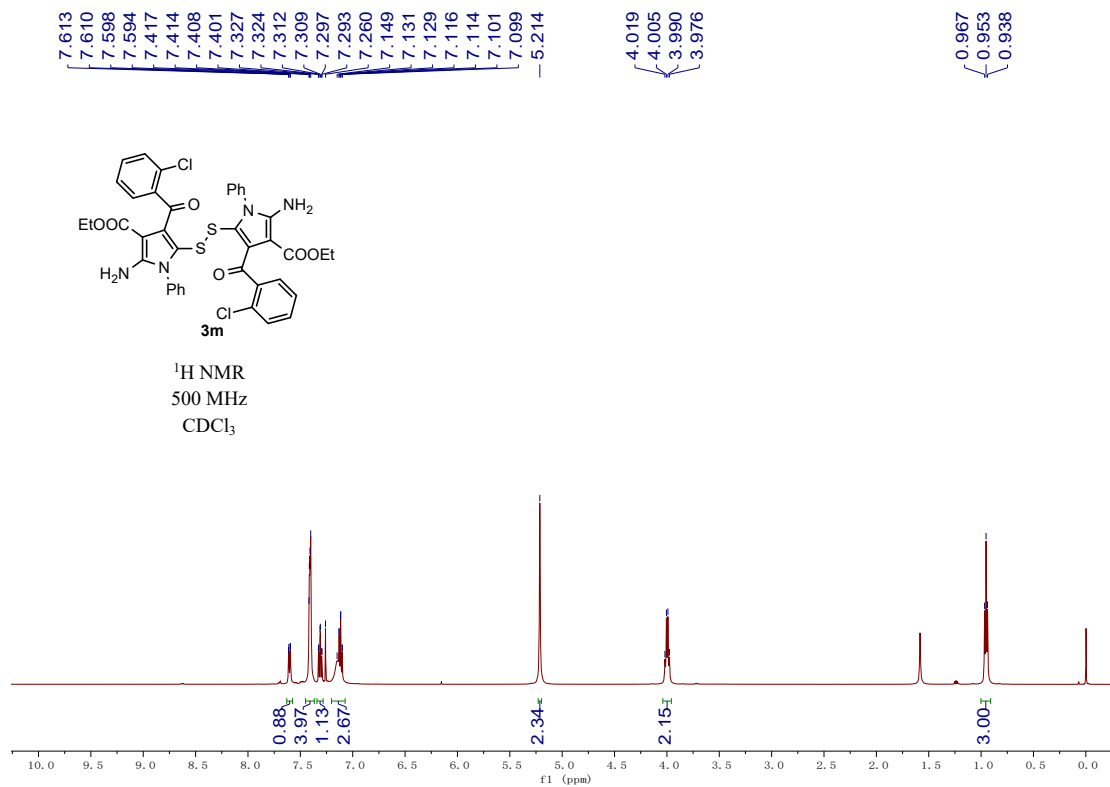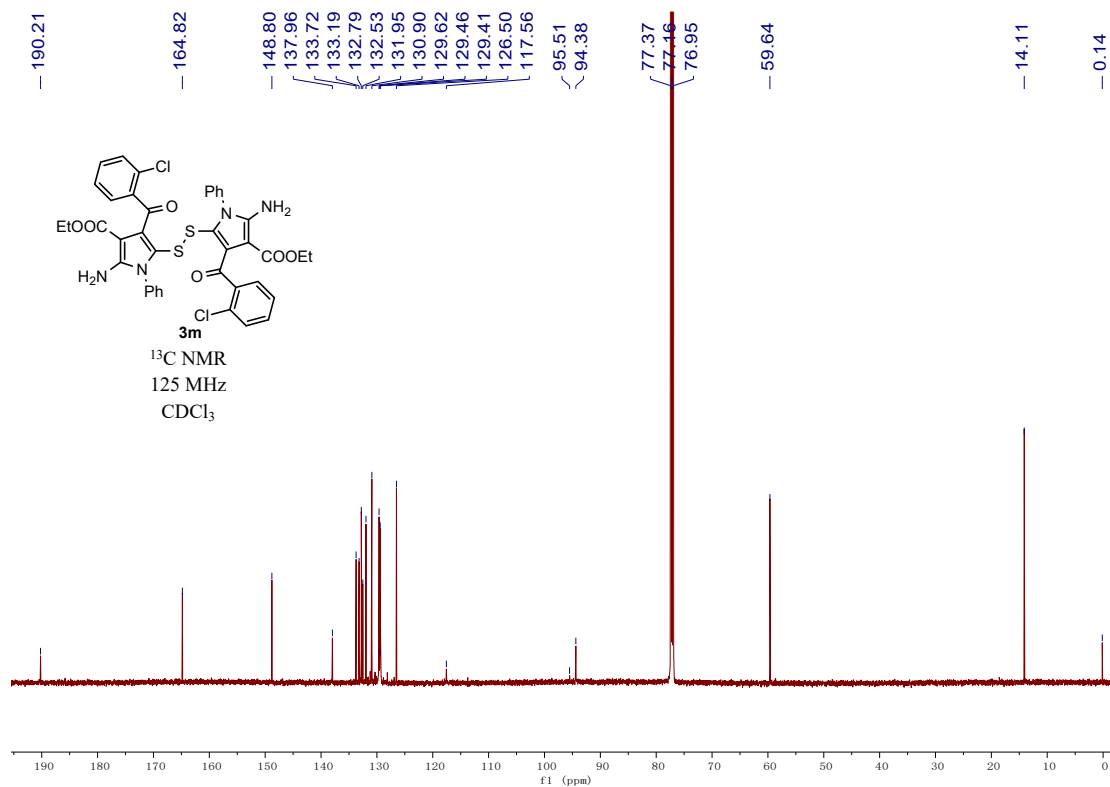



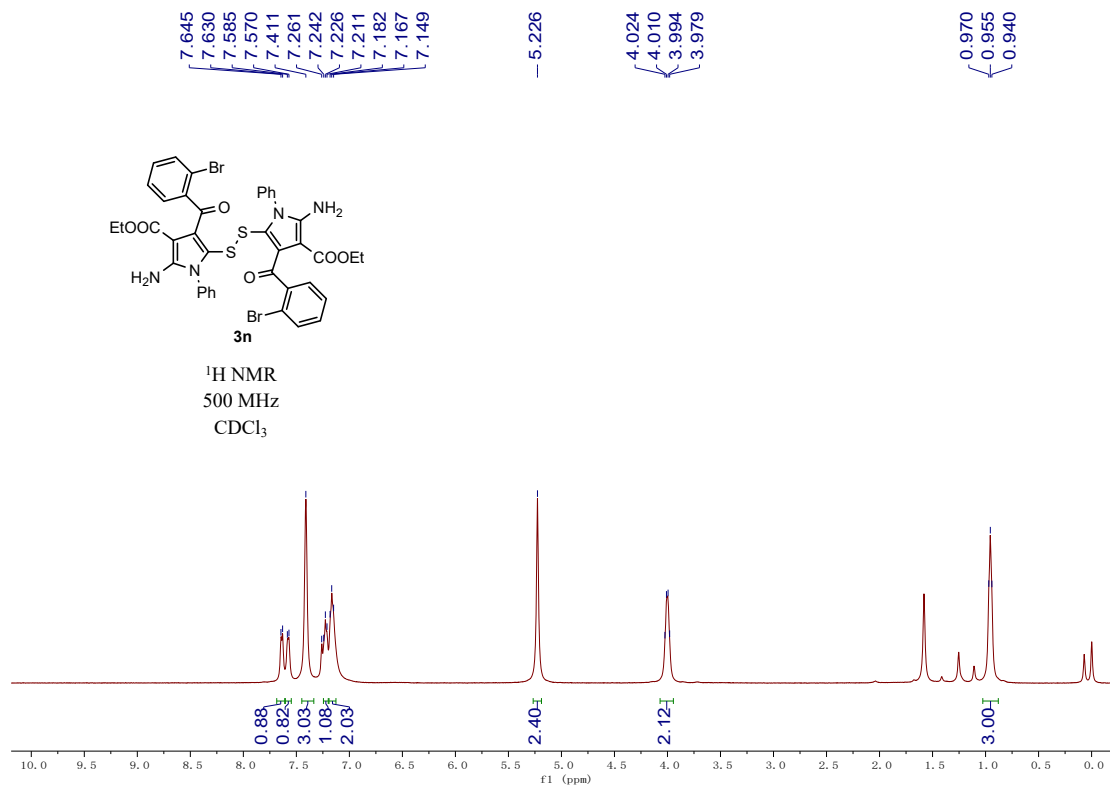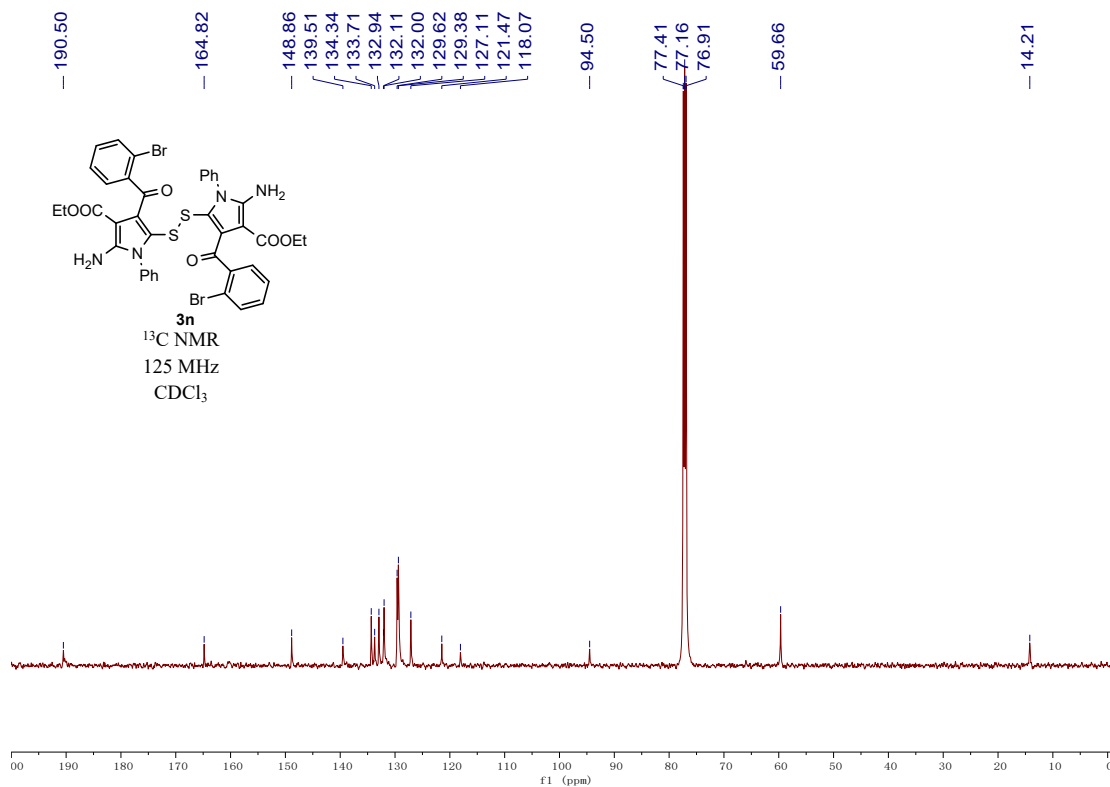

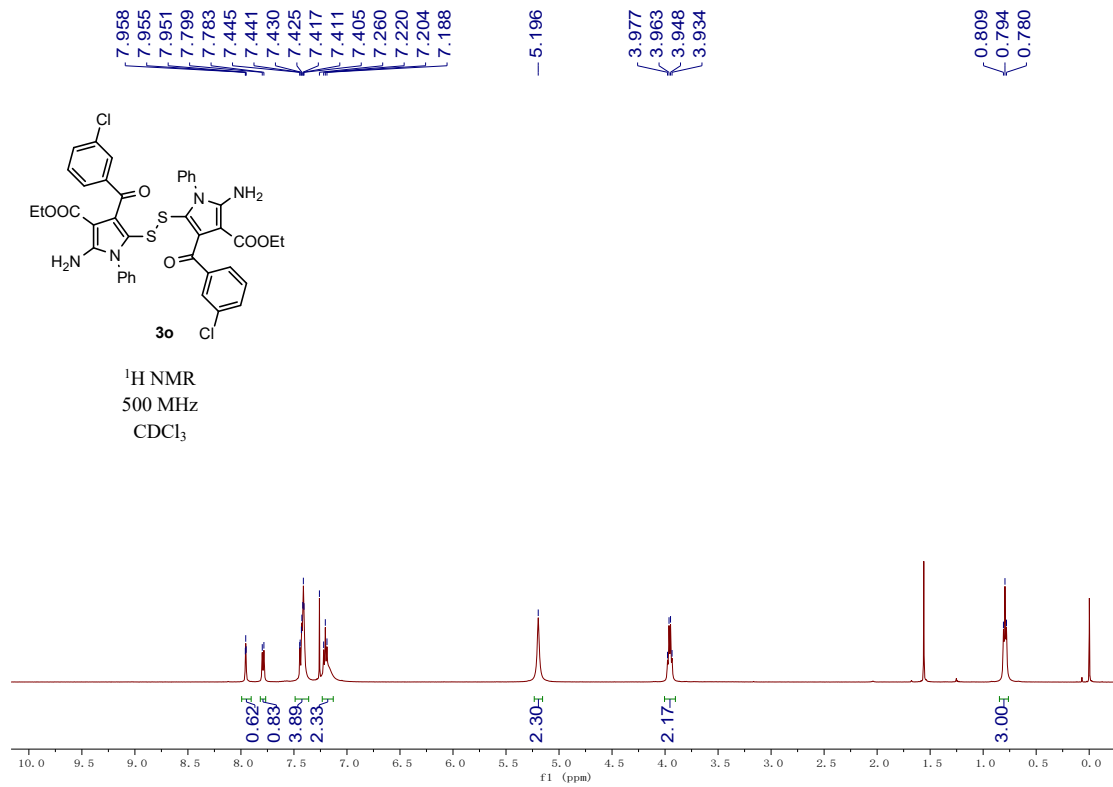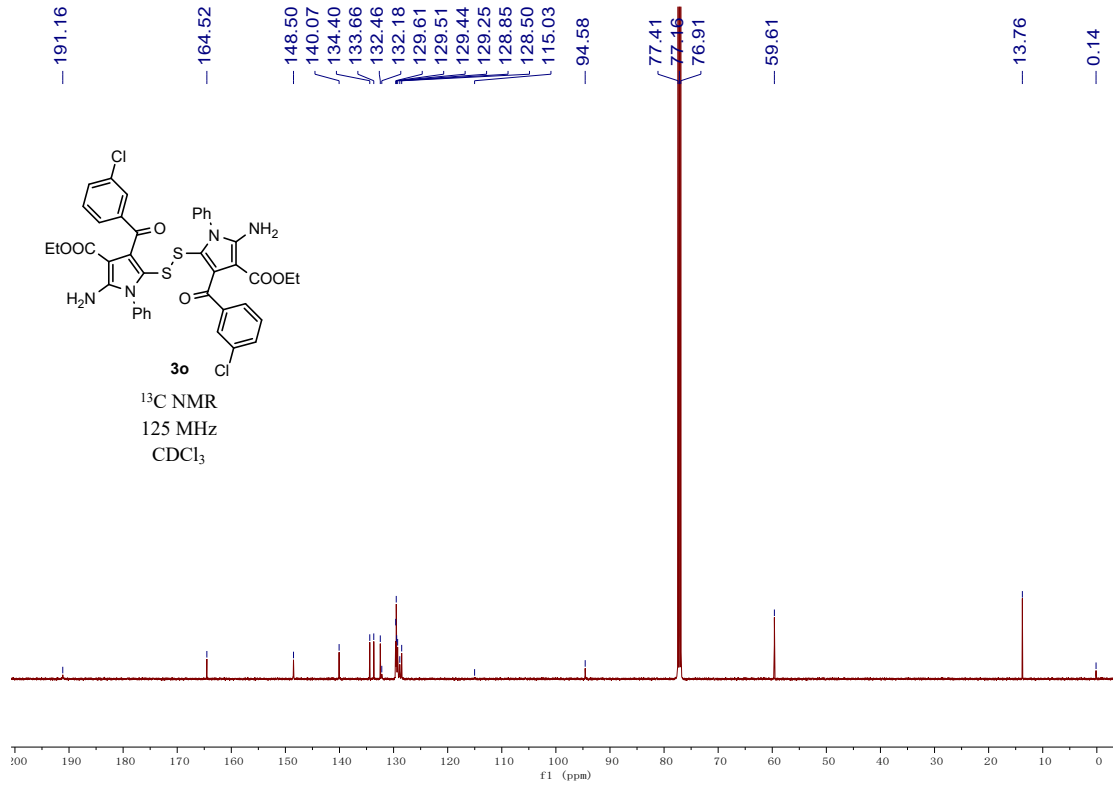

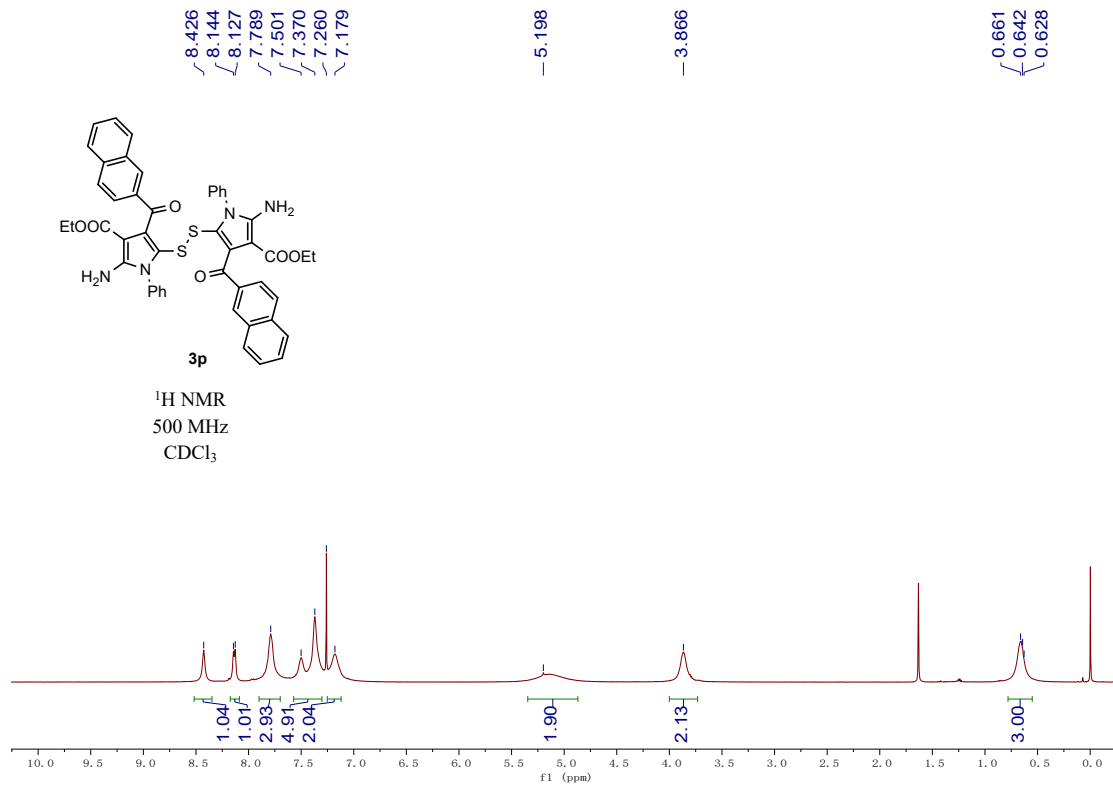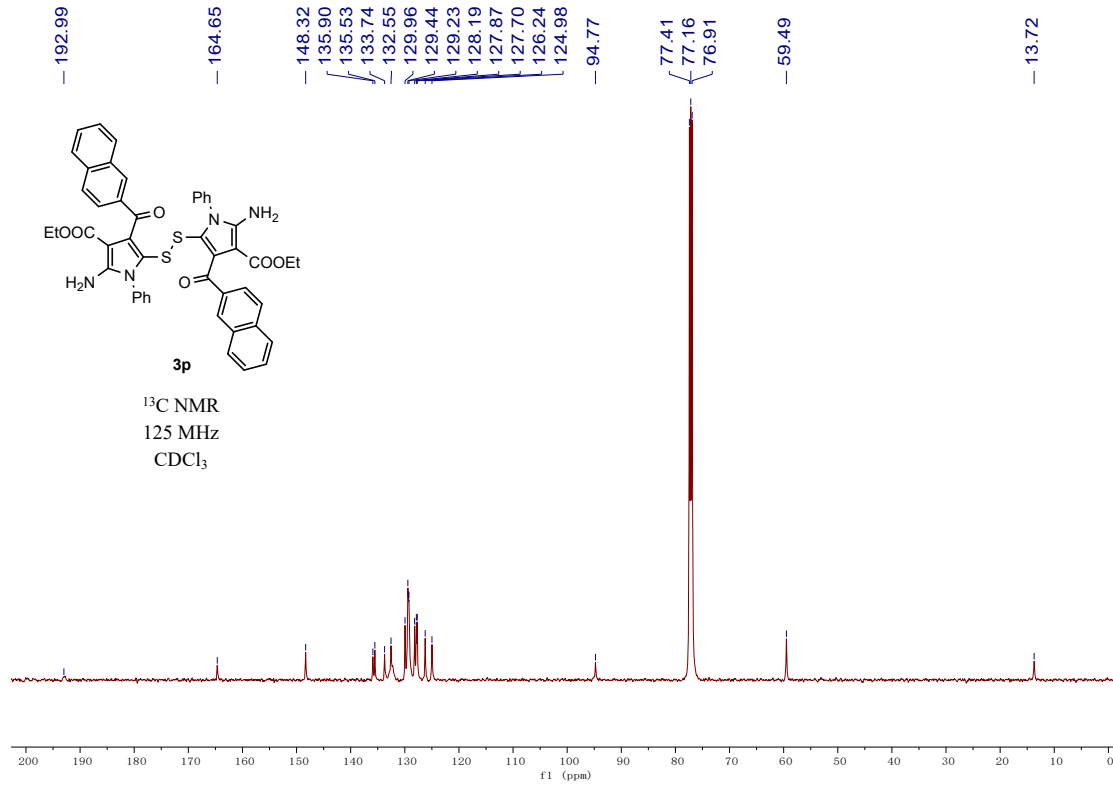

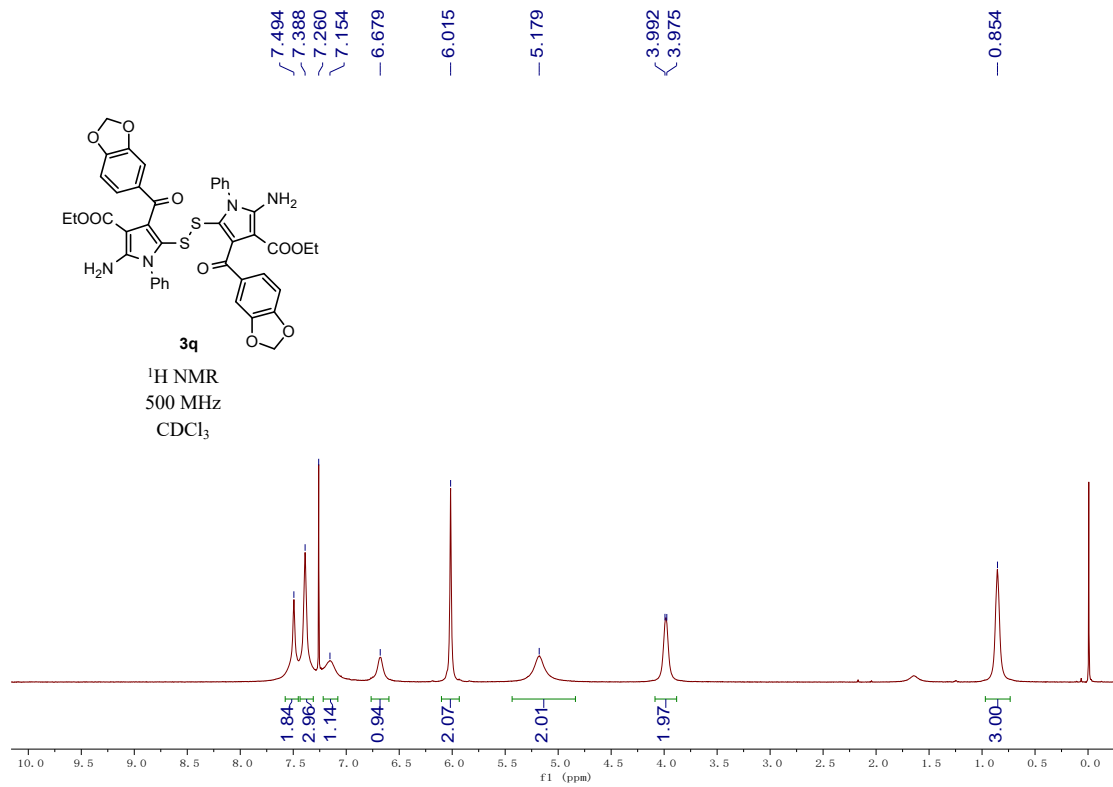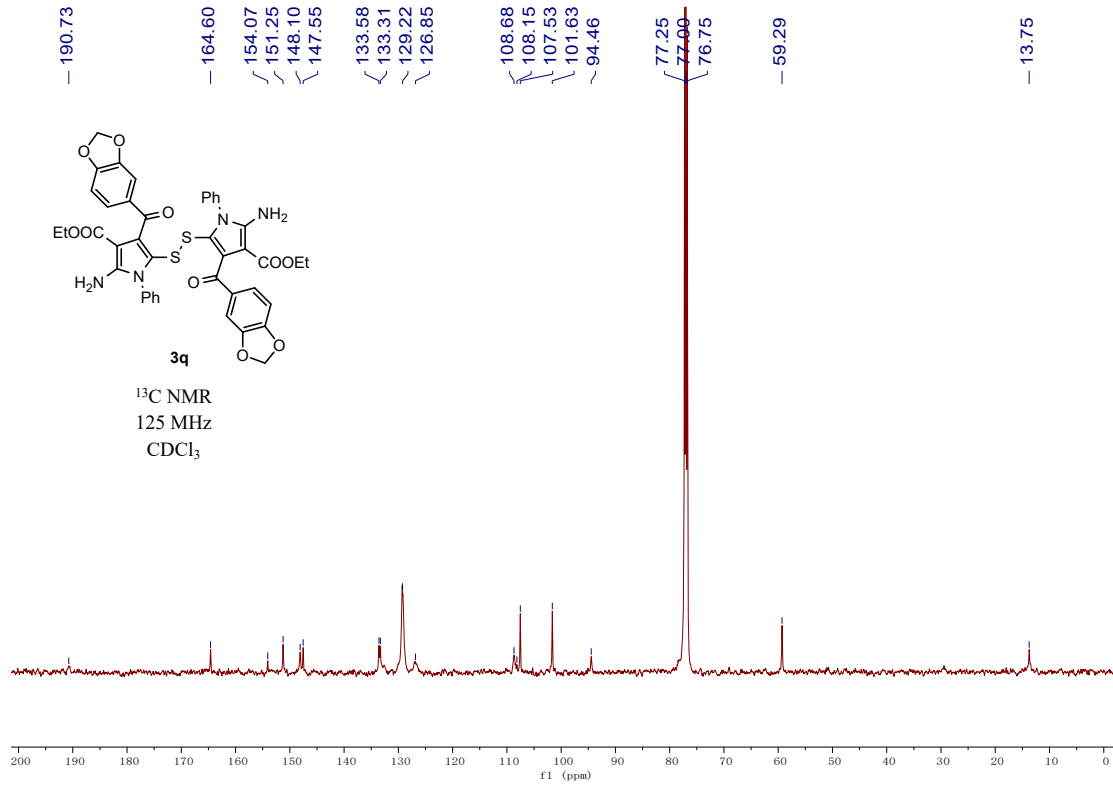

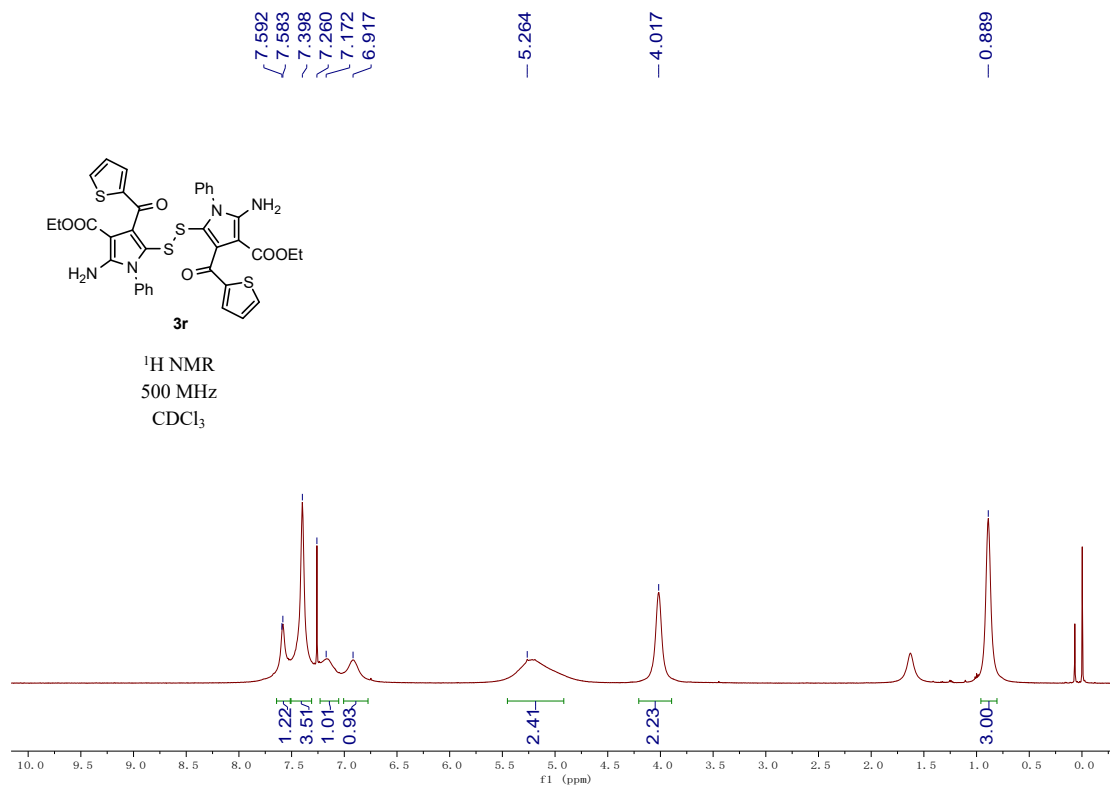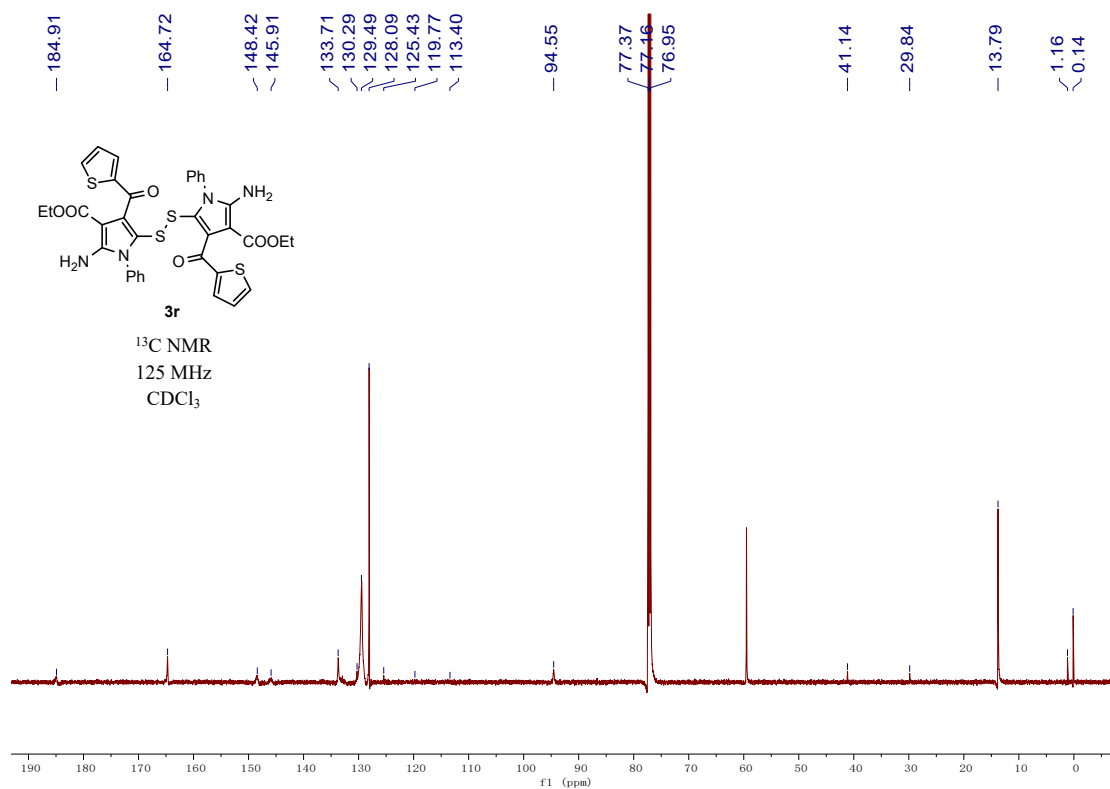



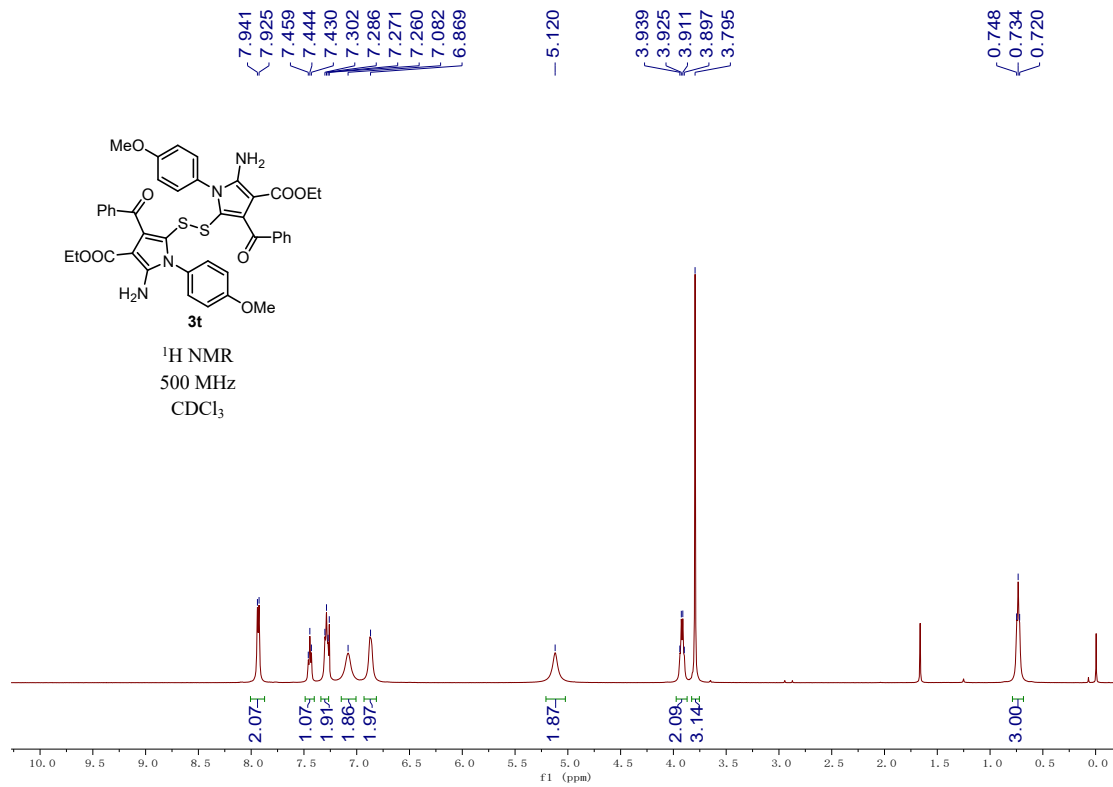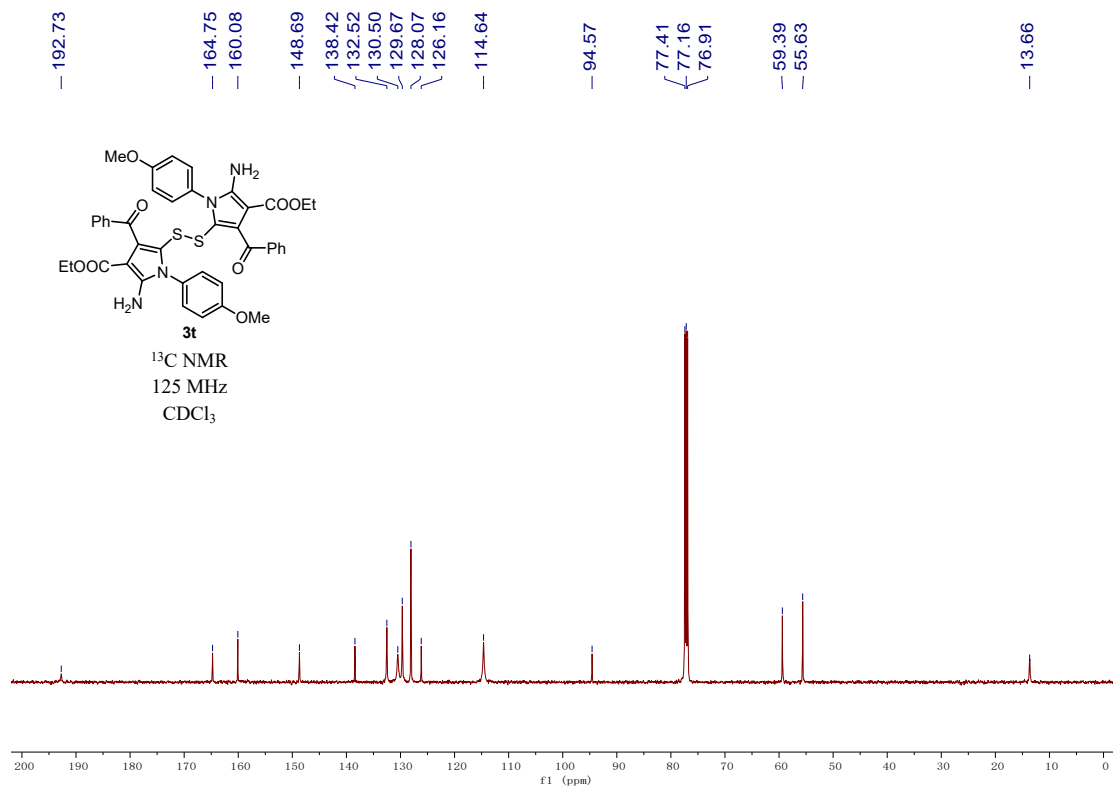

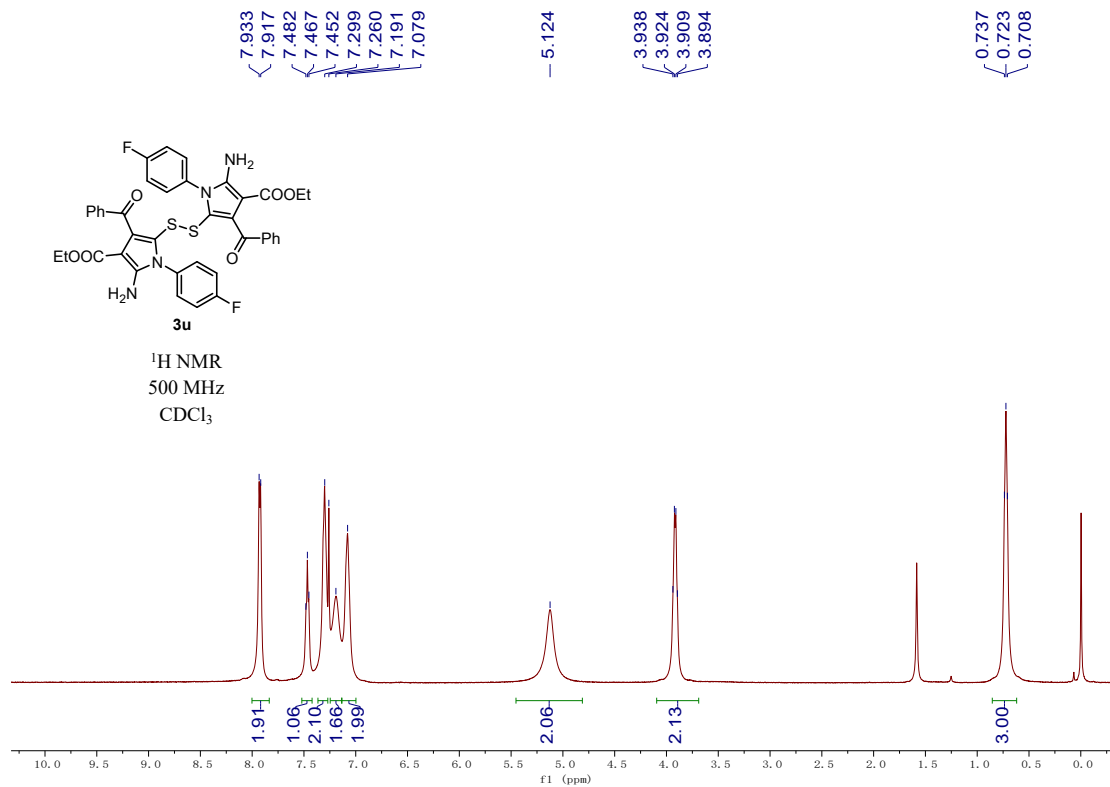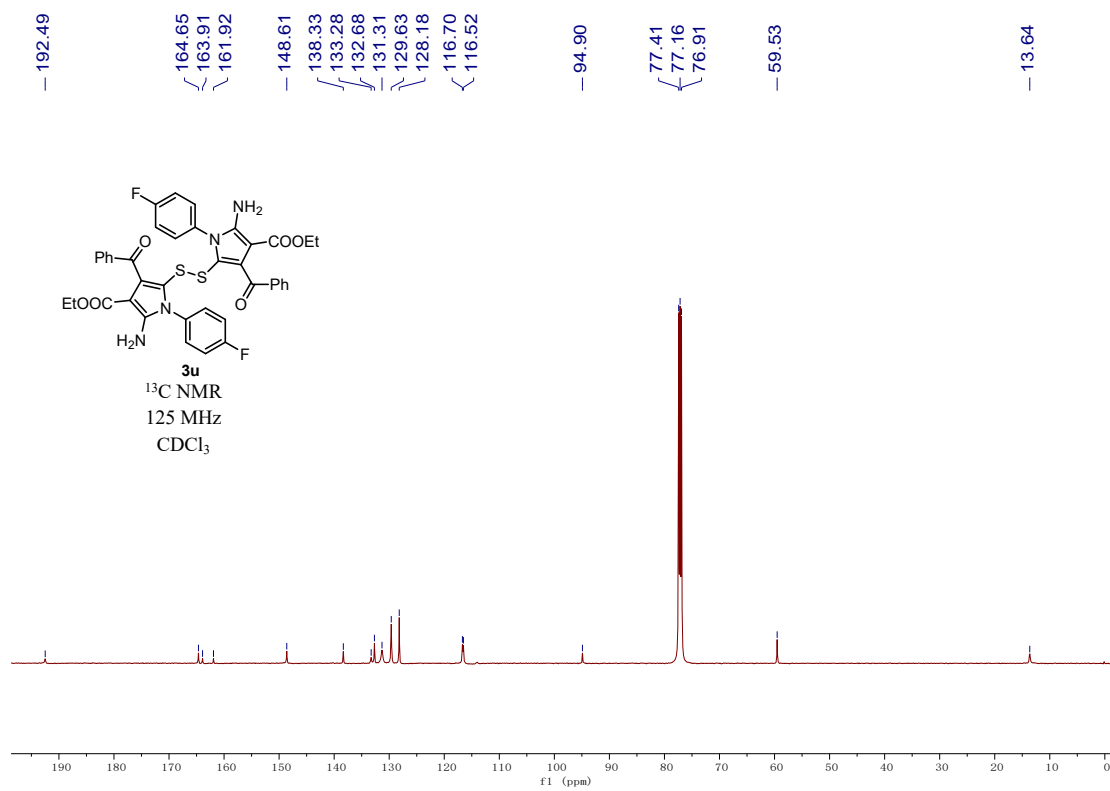



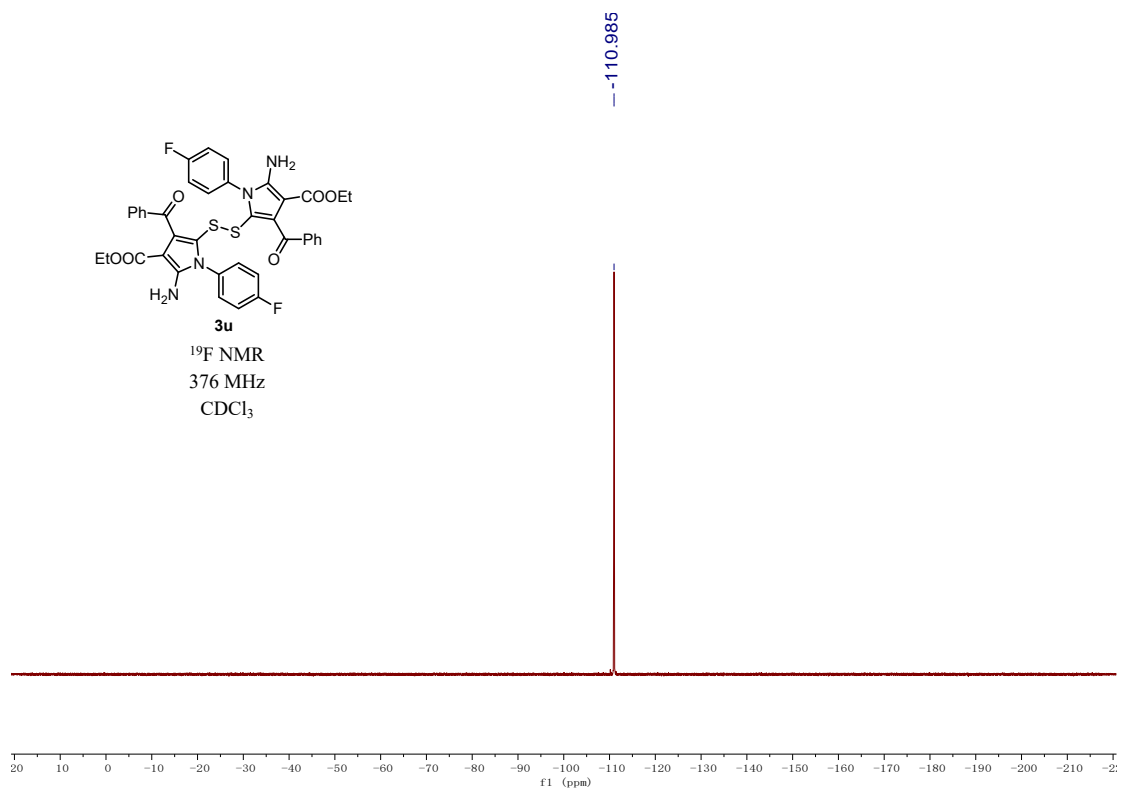

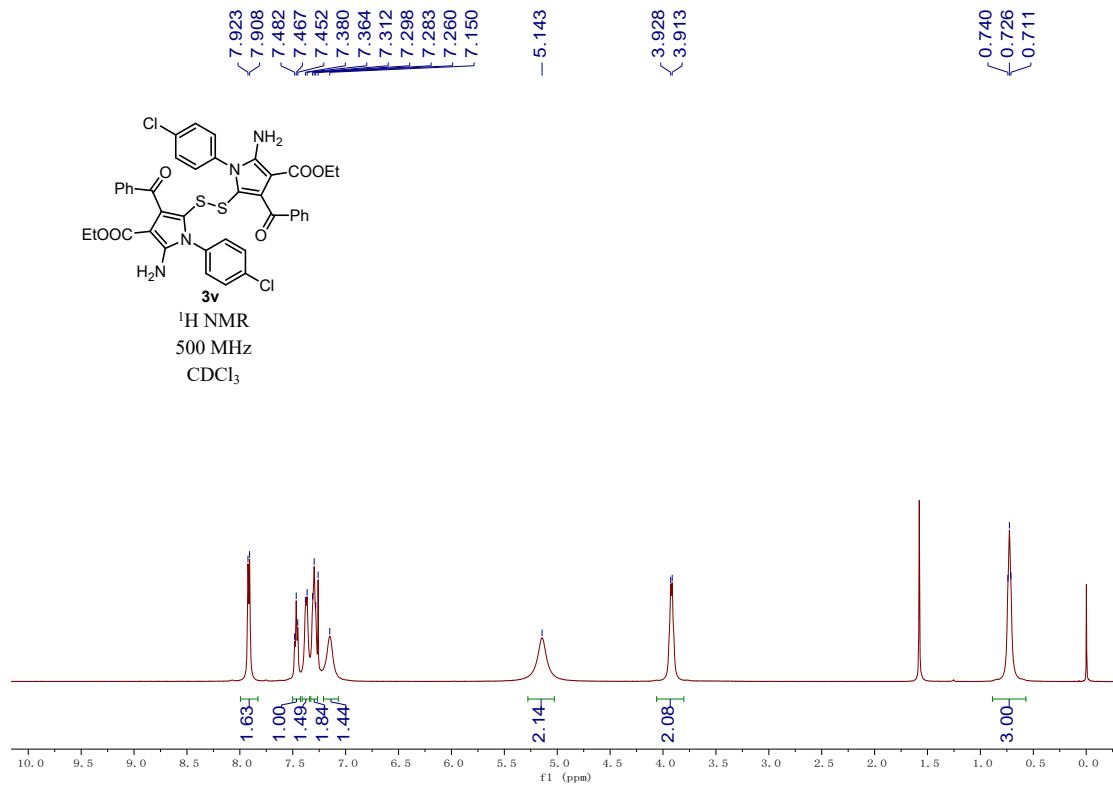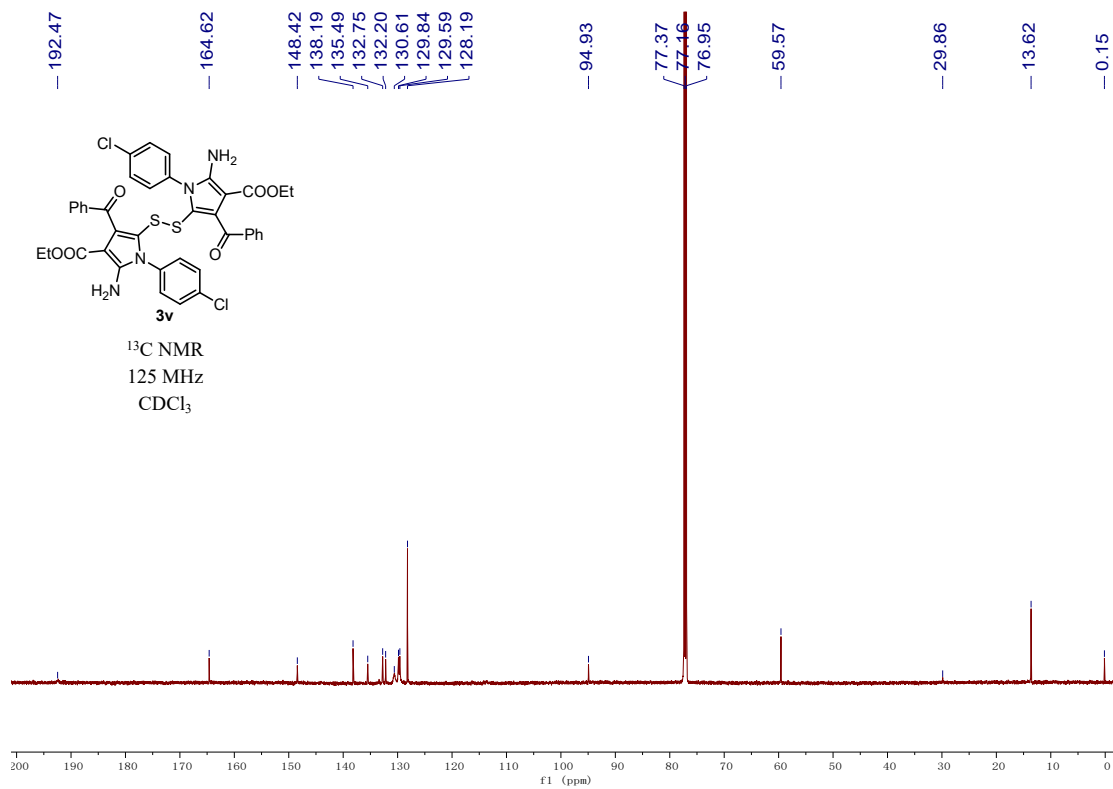

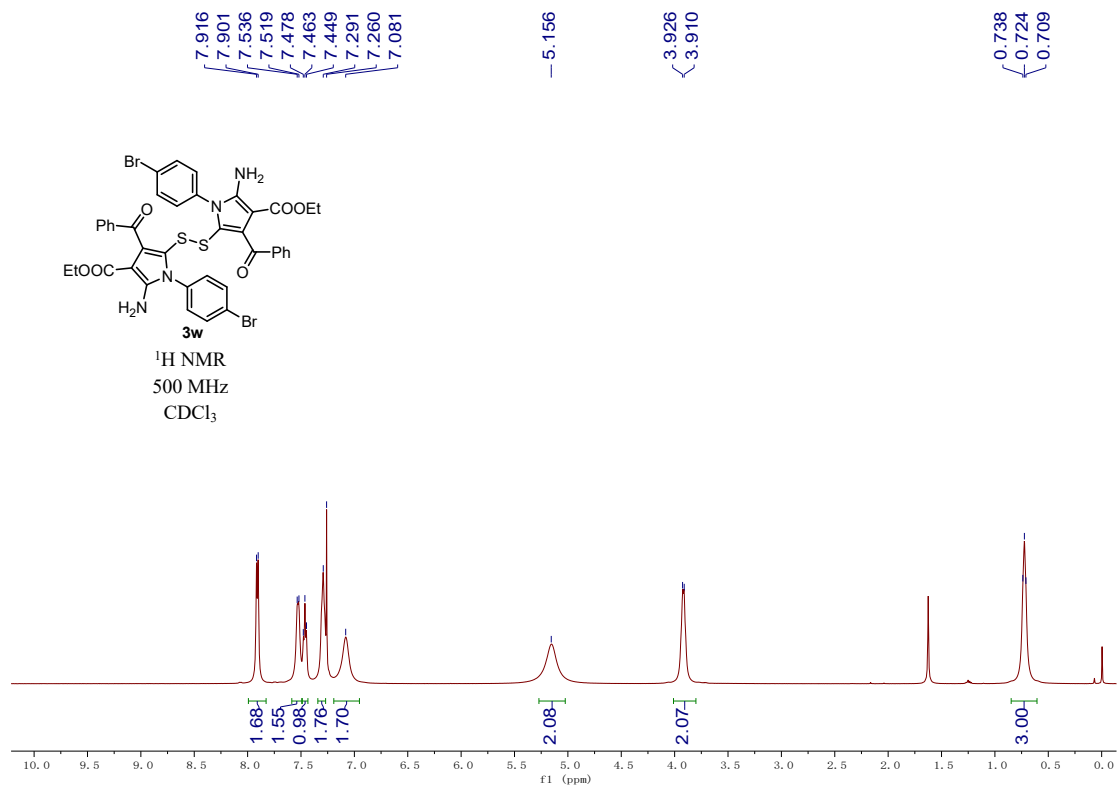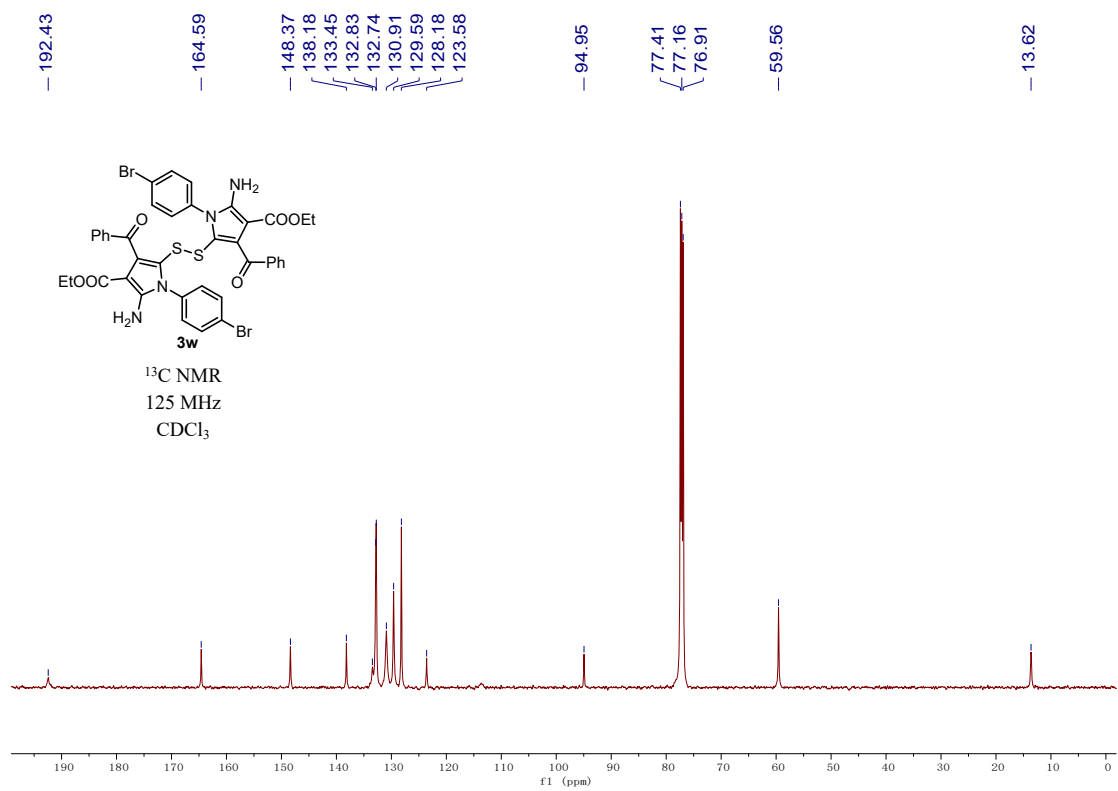

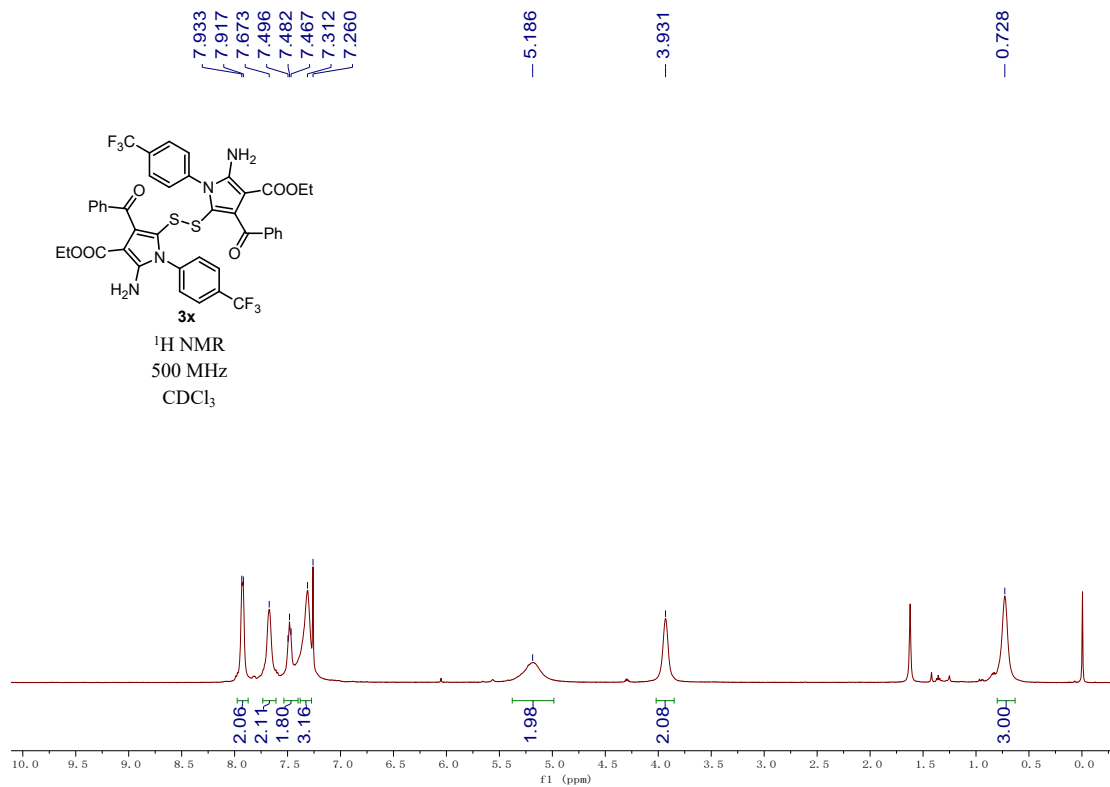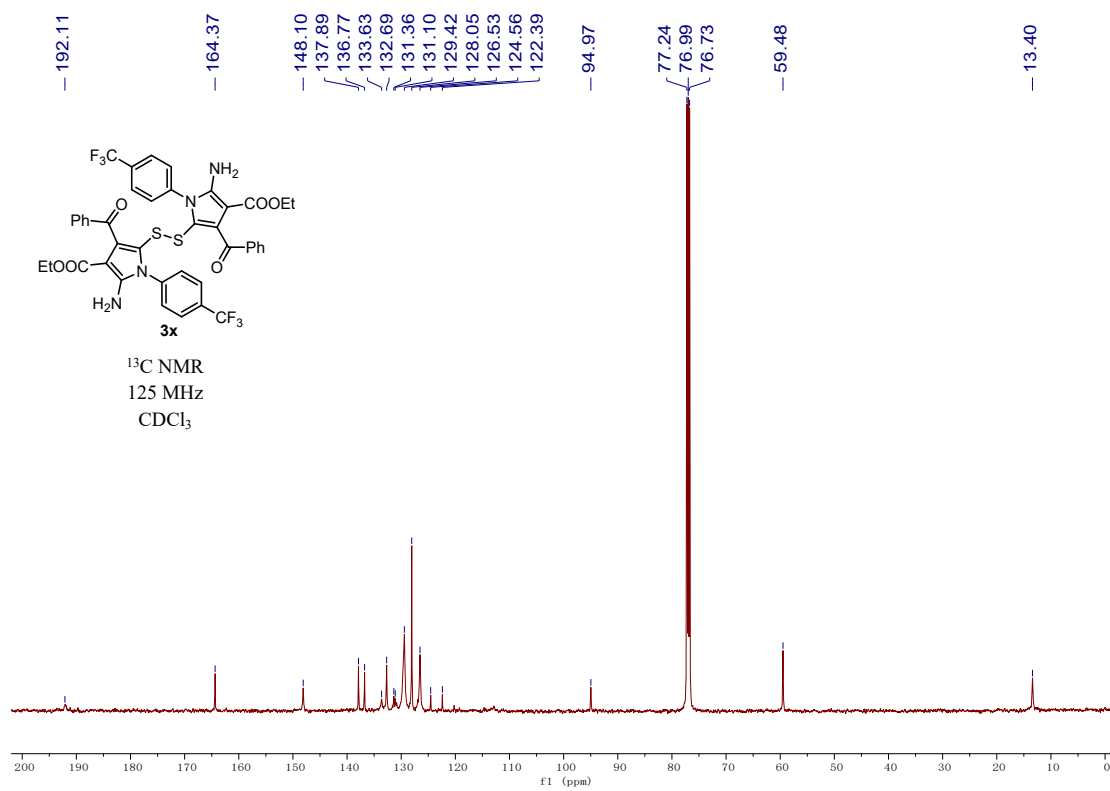

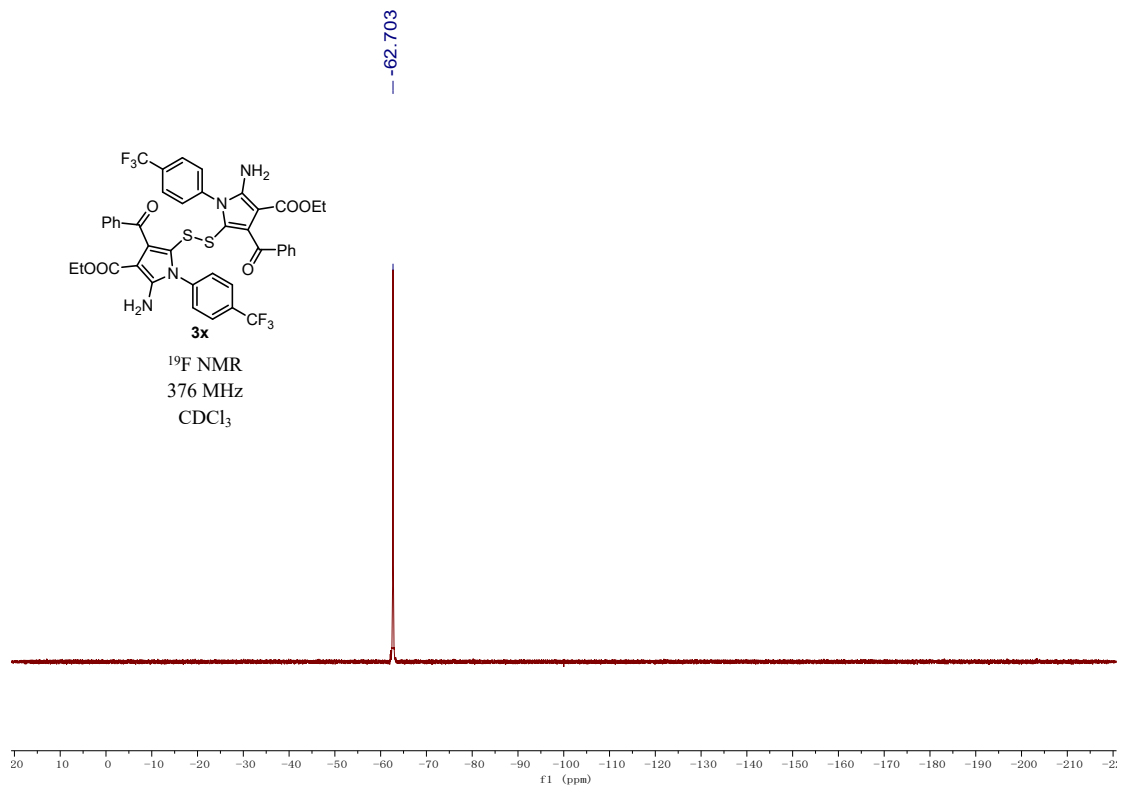

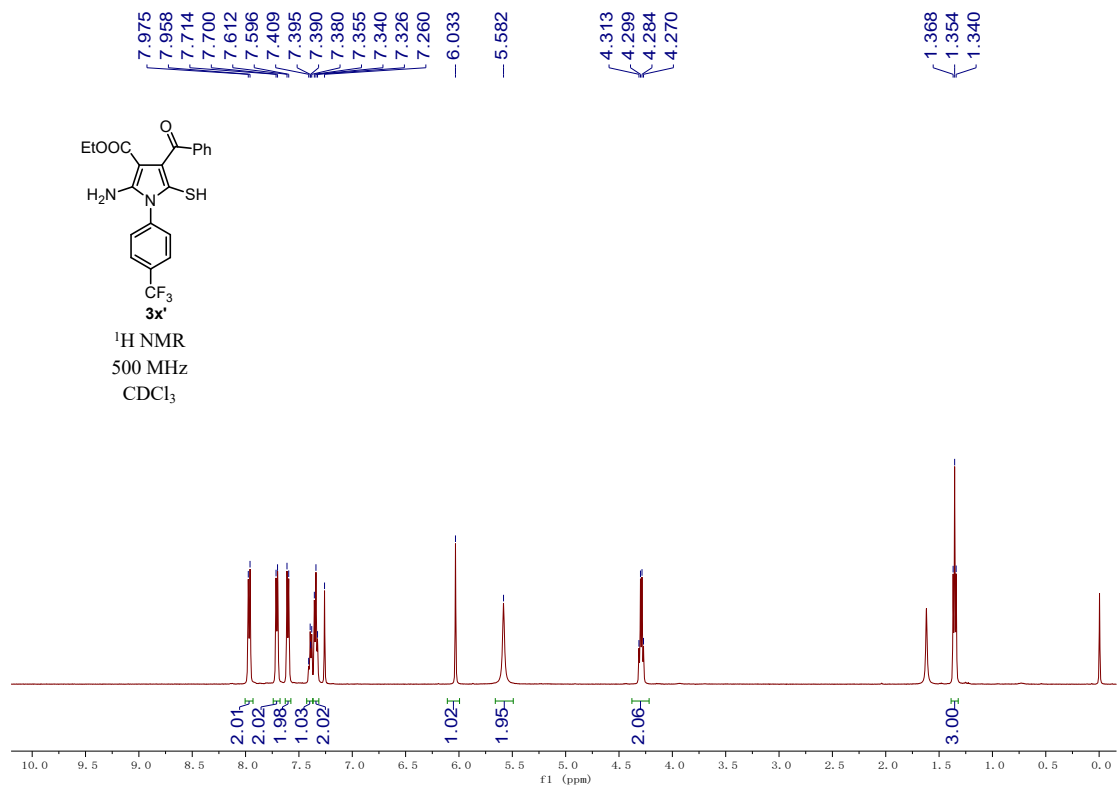

**3x' (exchanged with D<sub>2</sub>O)**

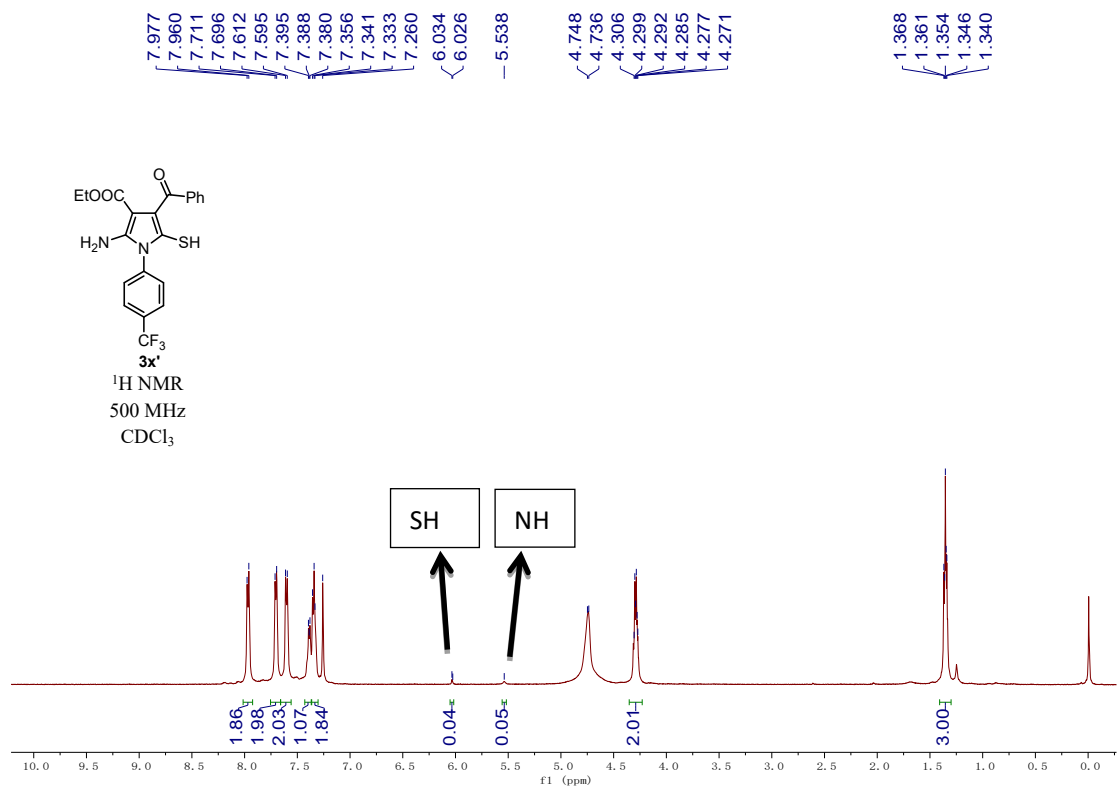

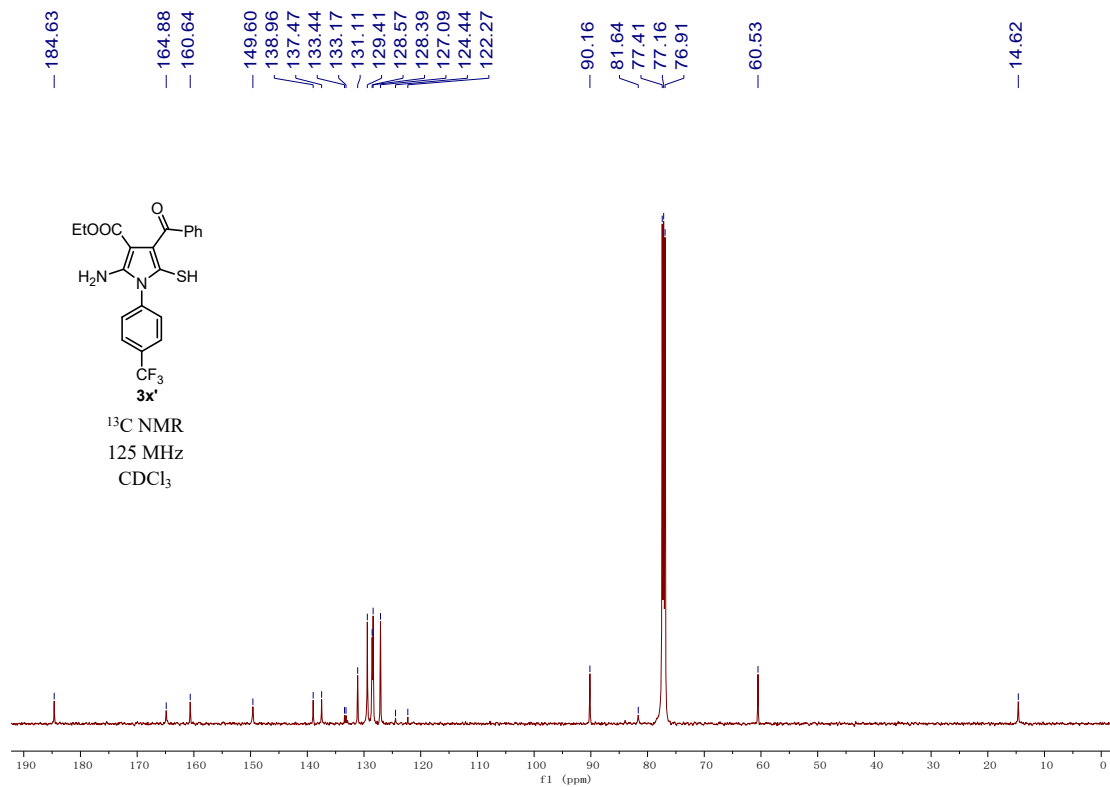

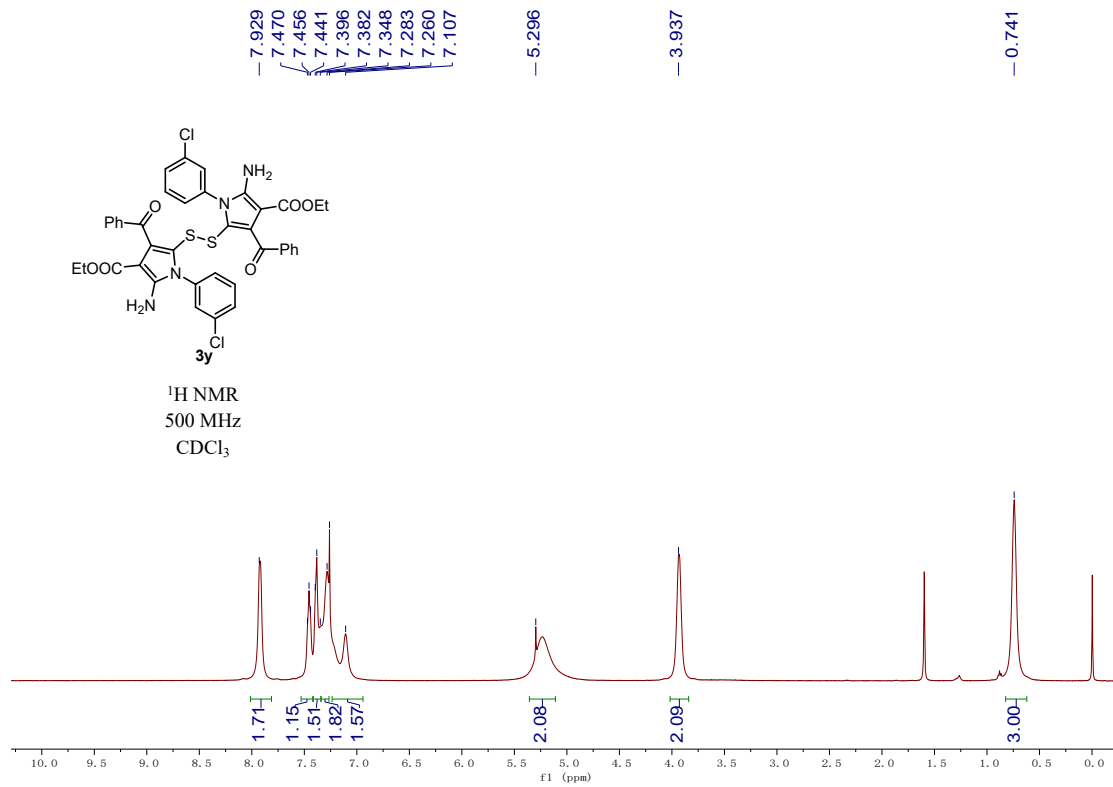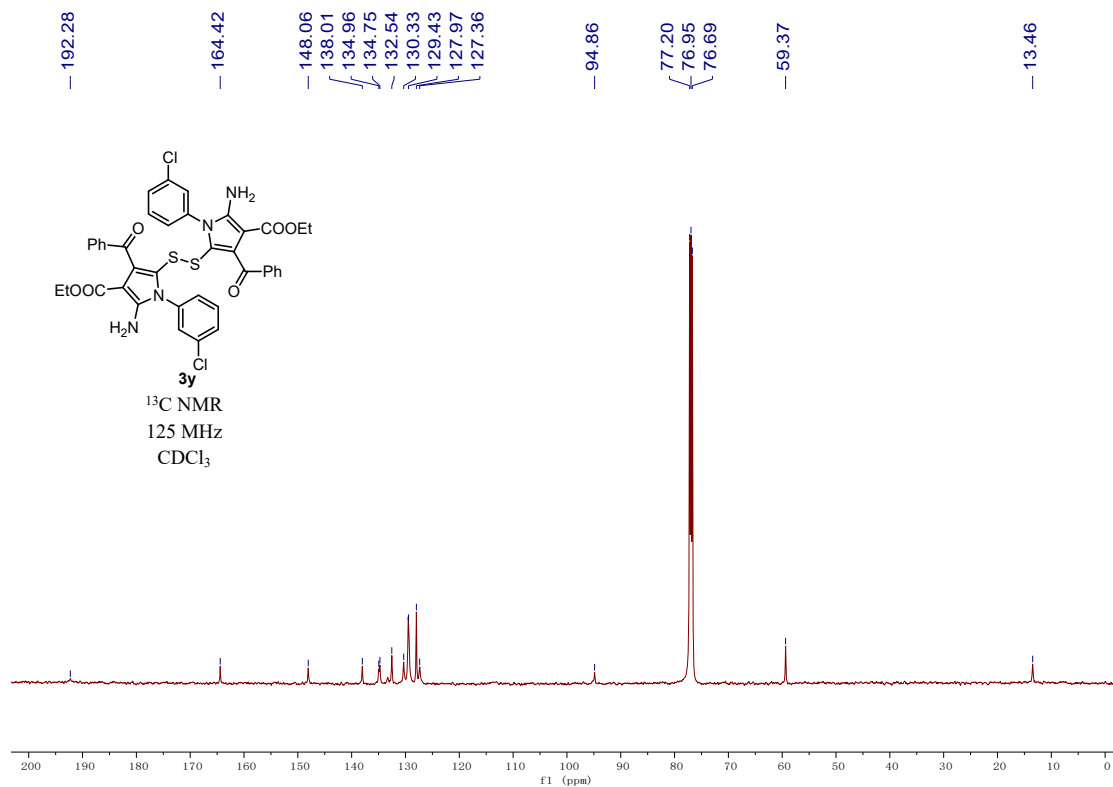



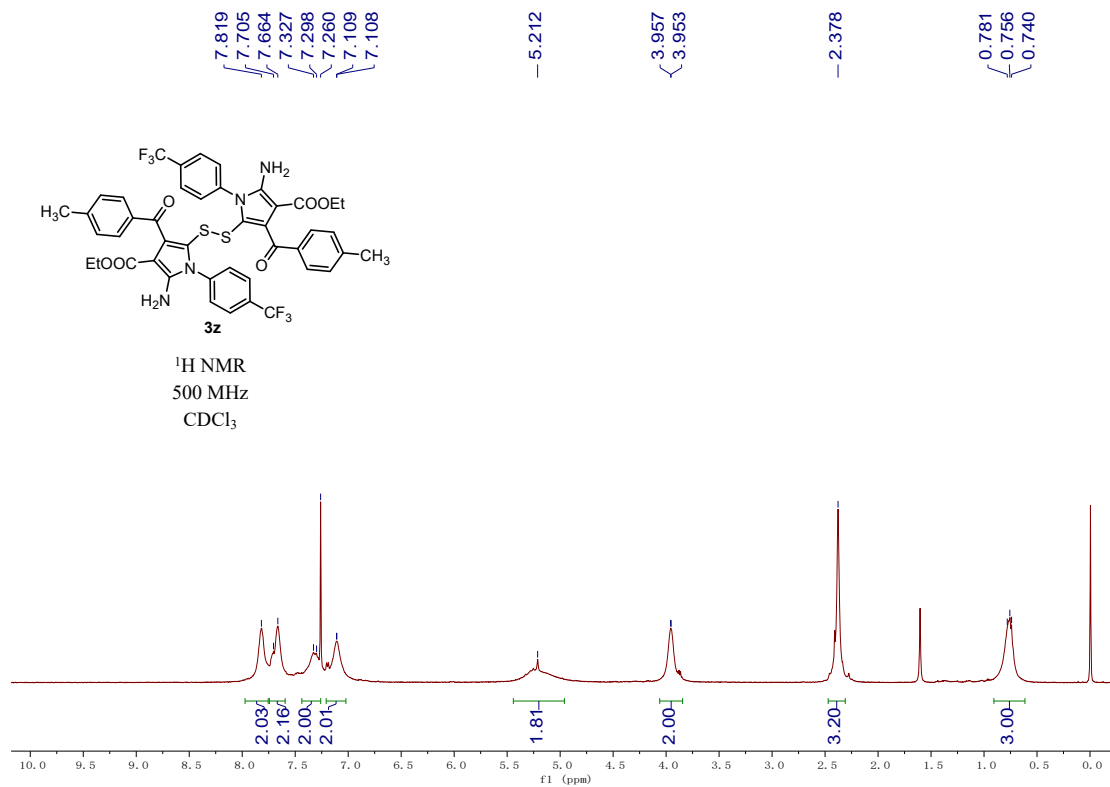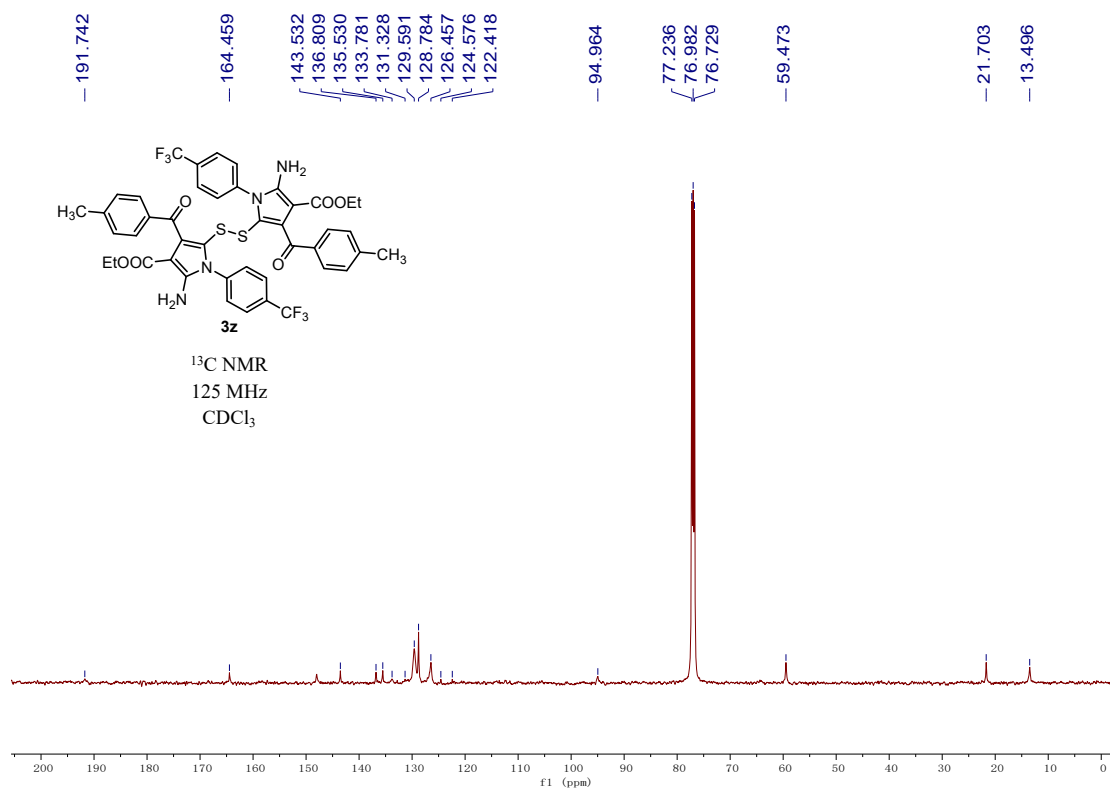

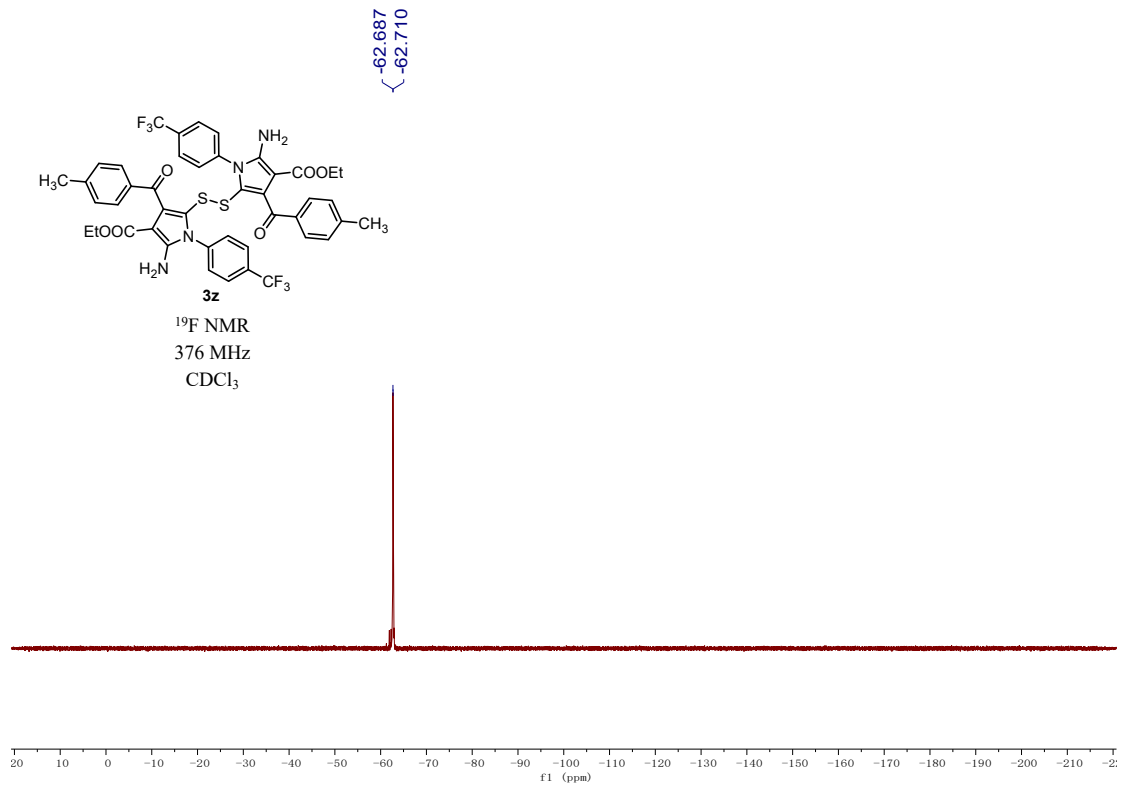

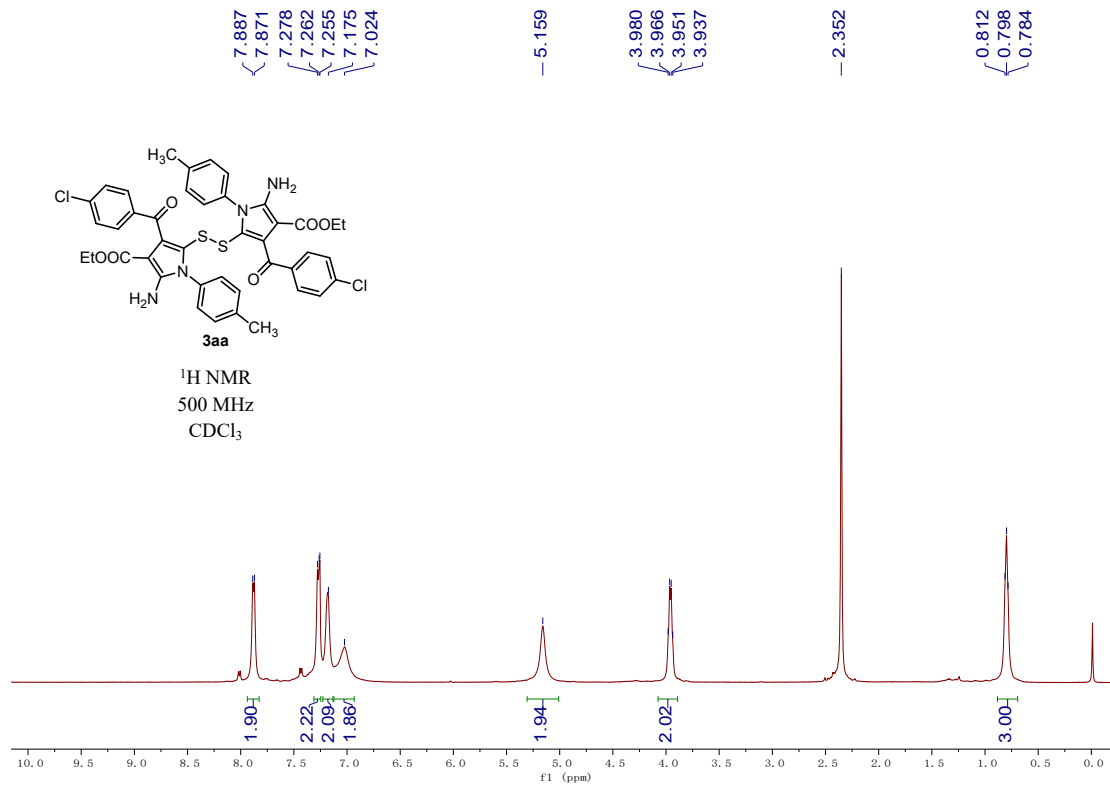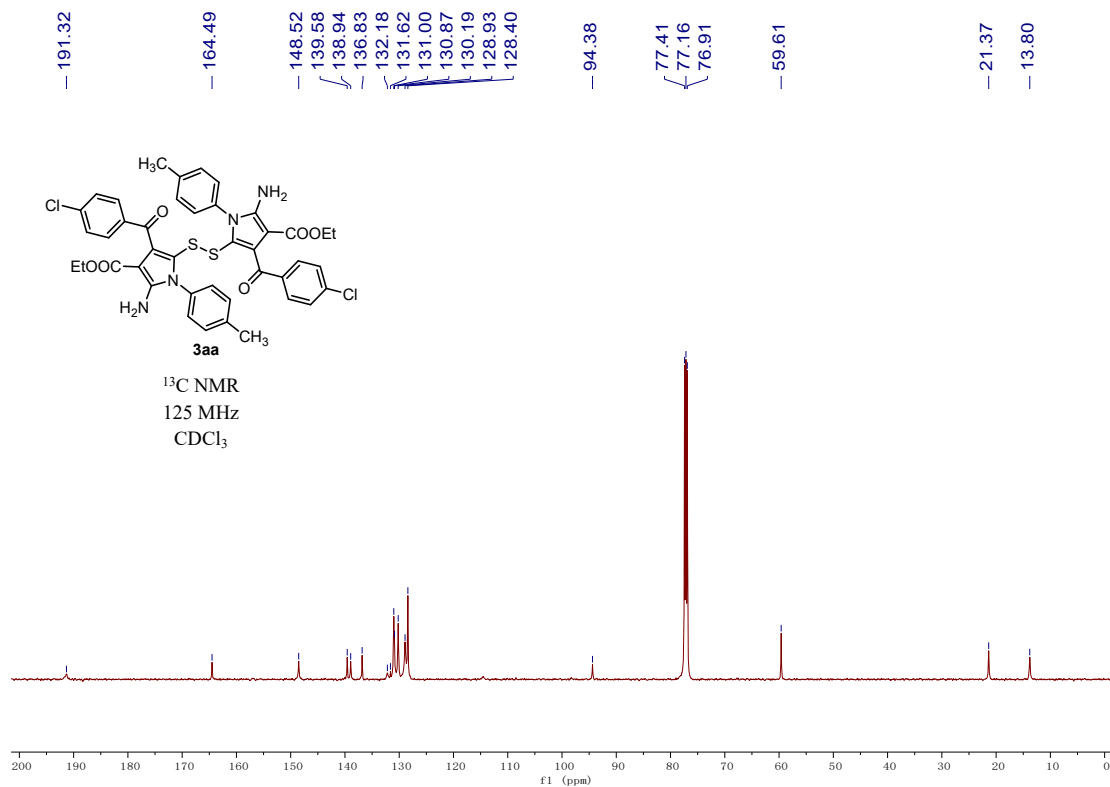

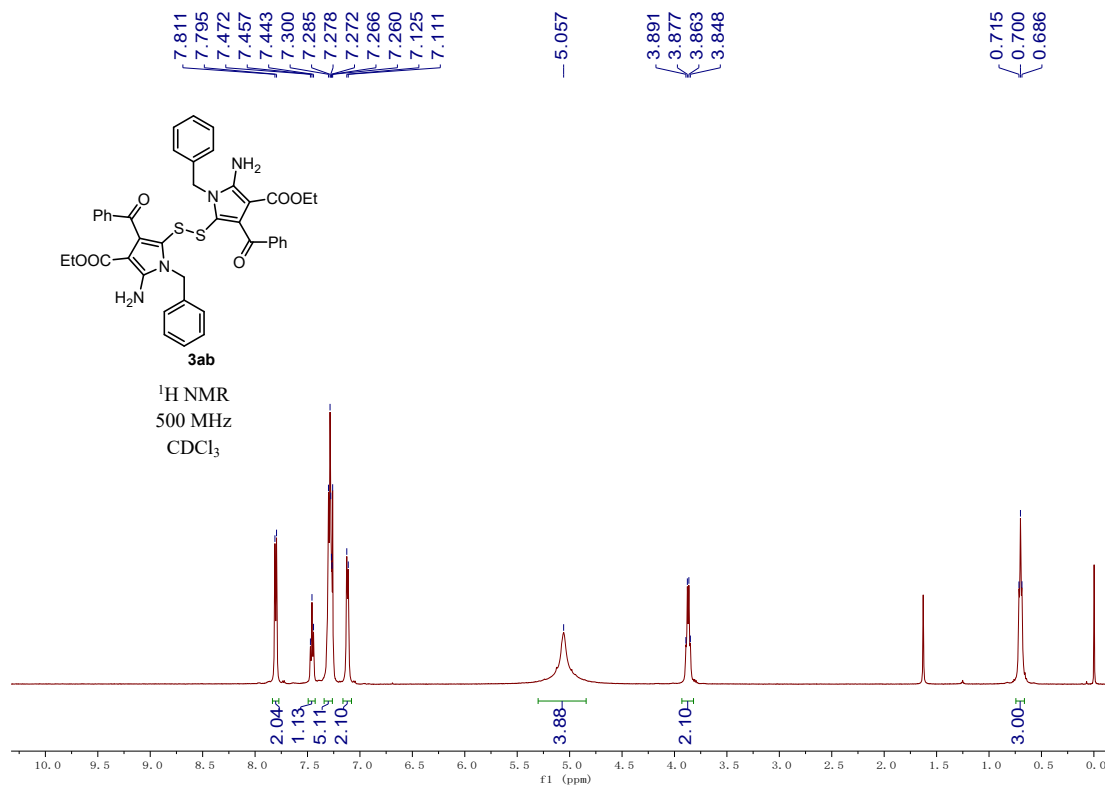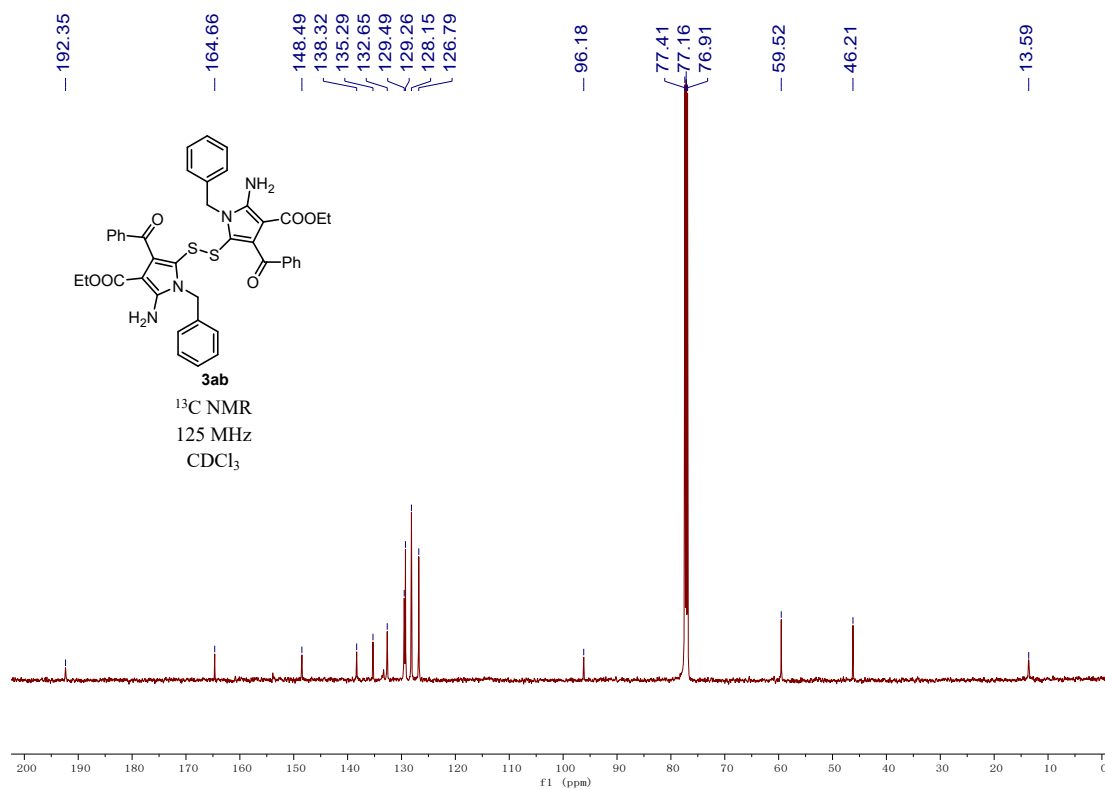

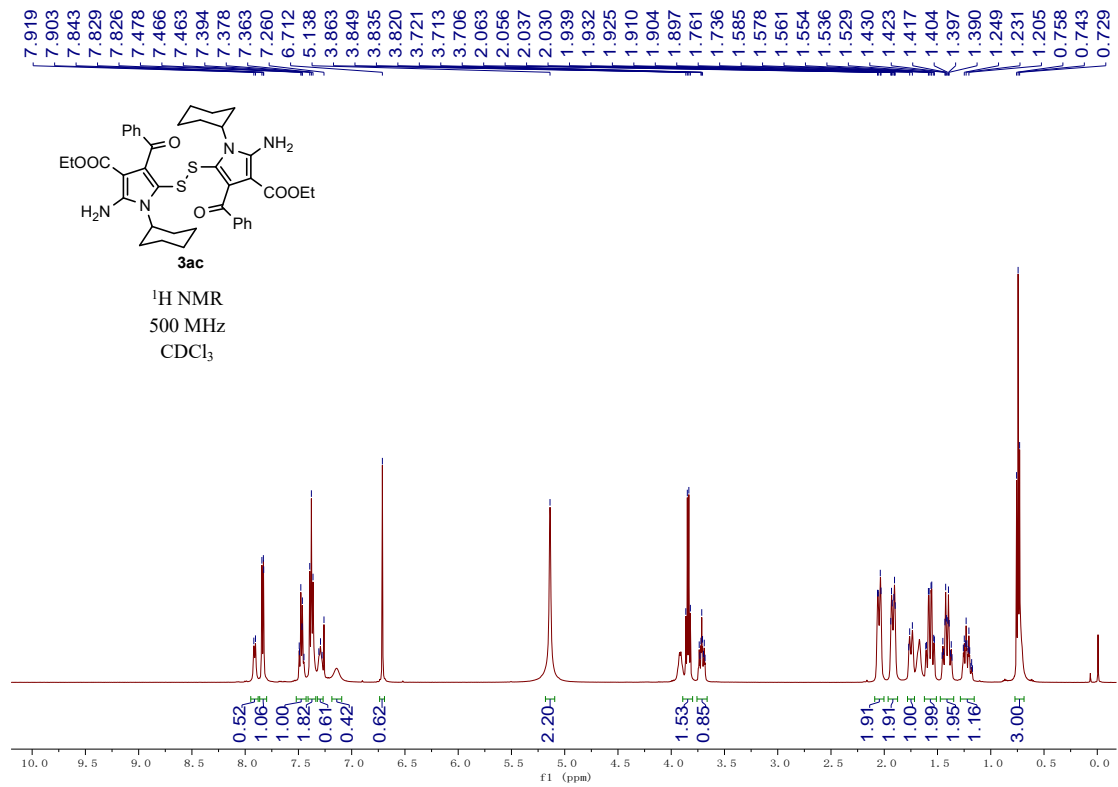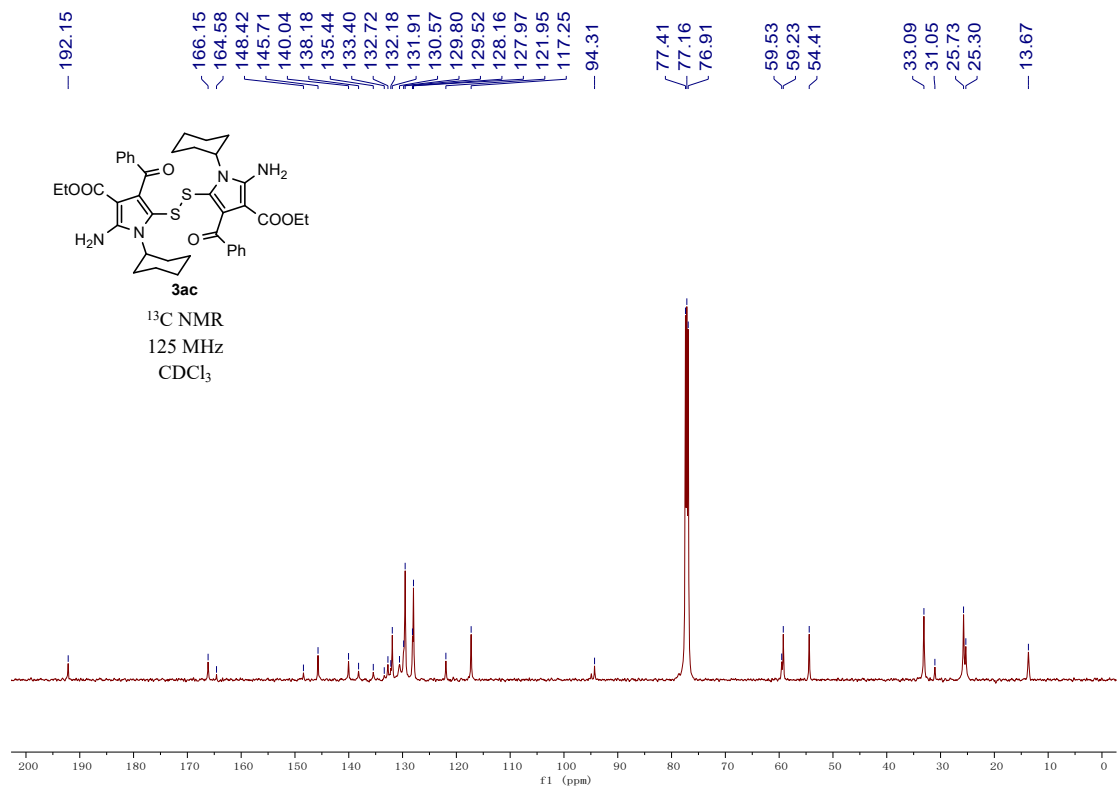

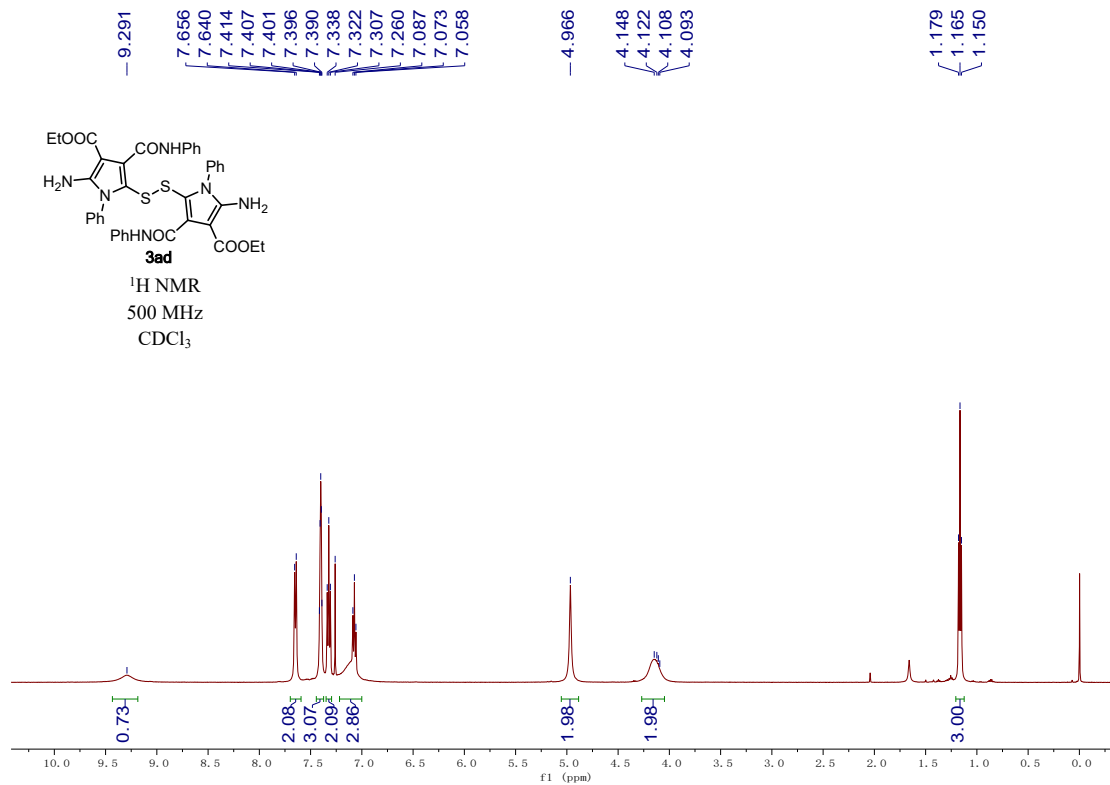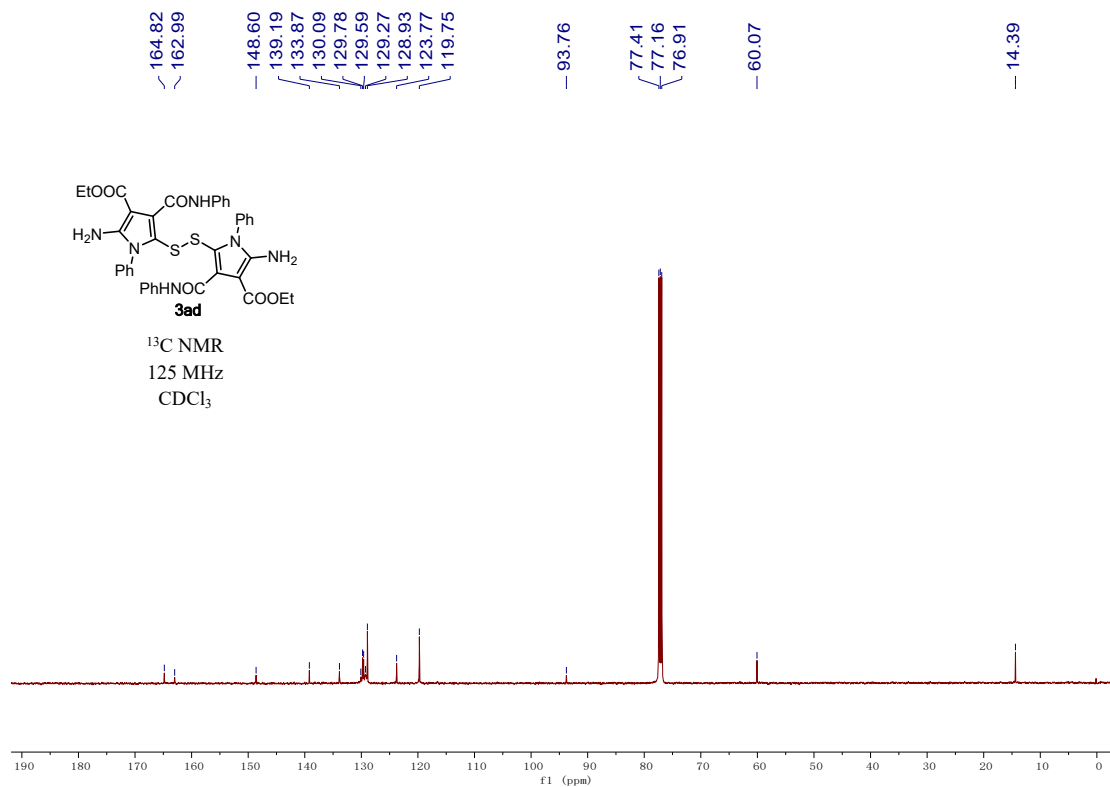

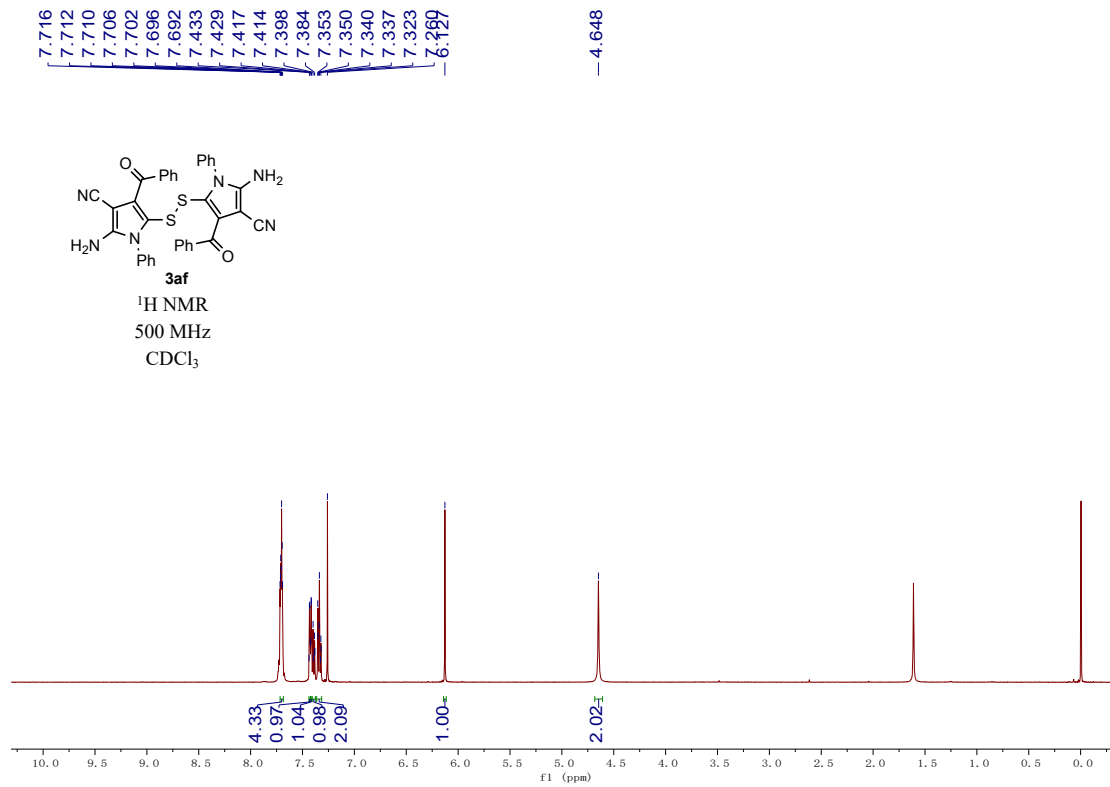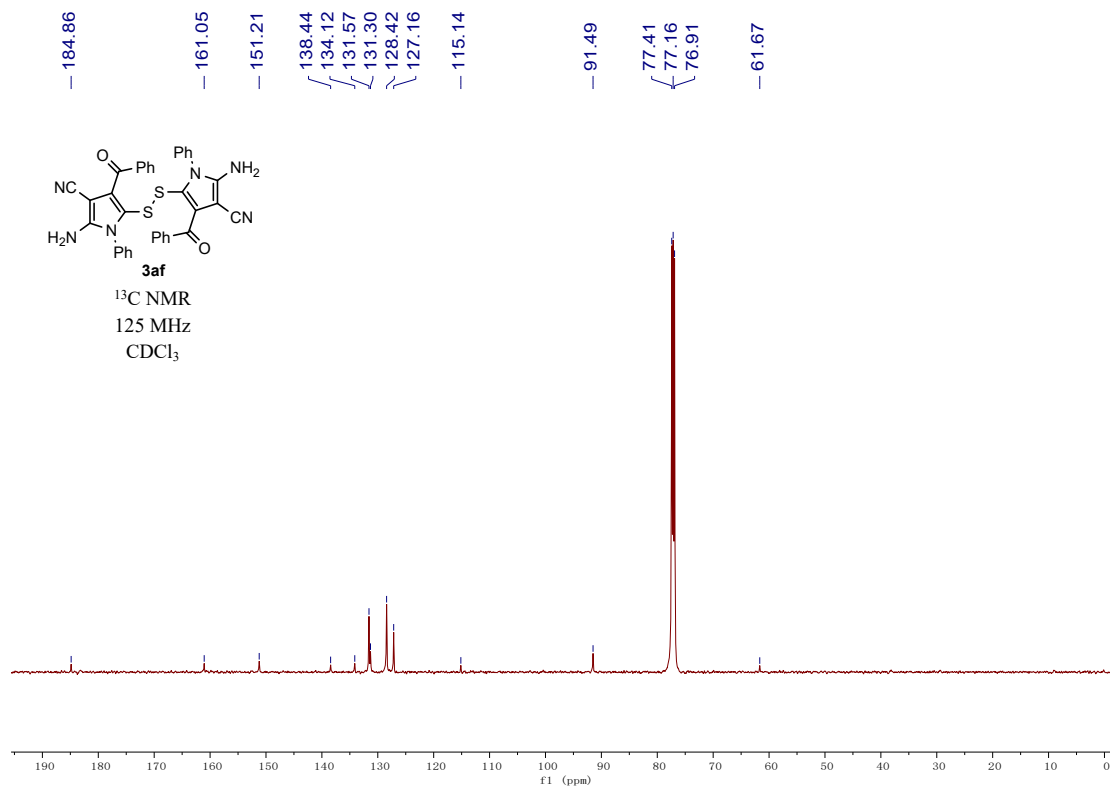

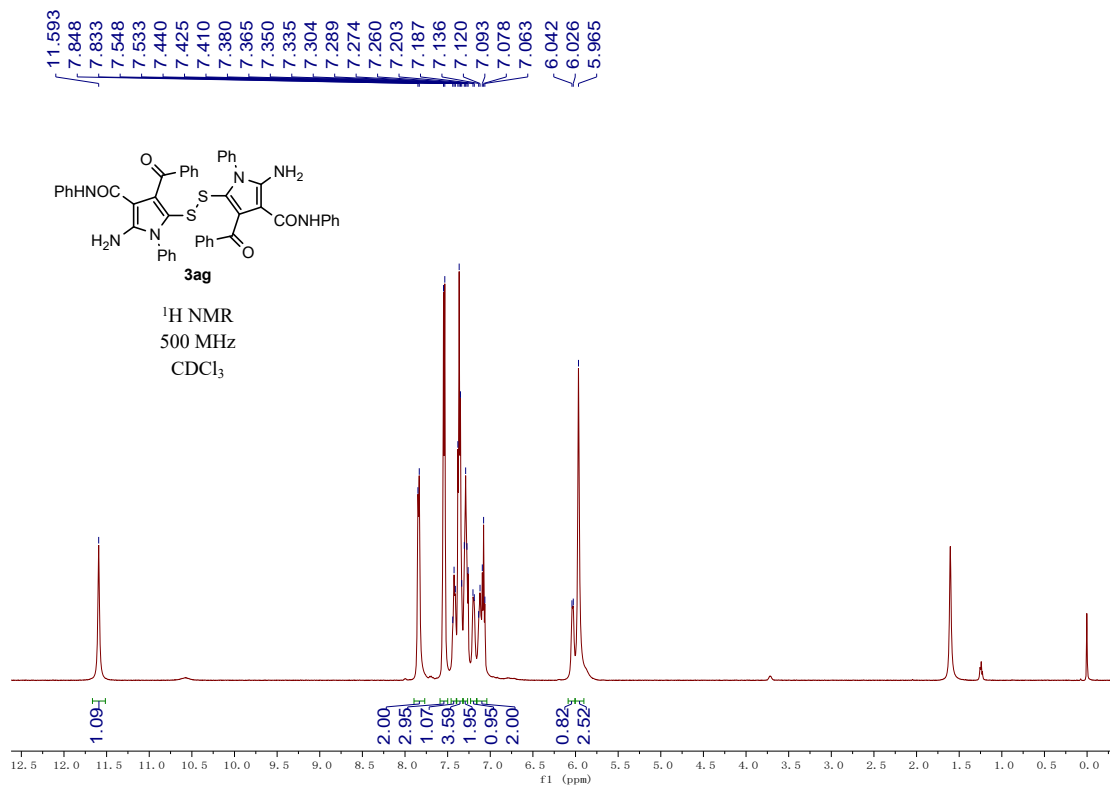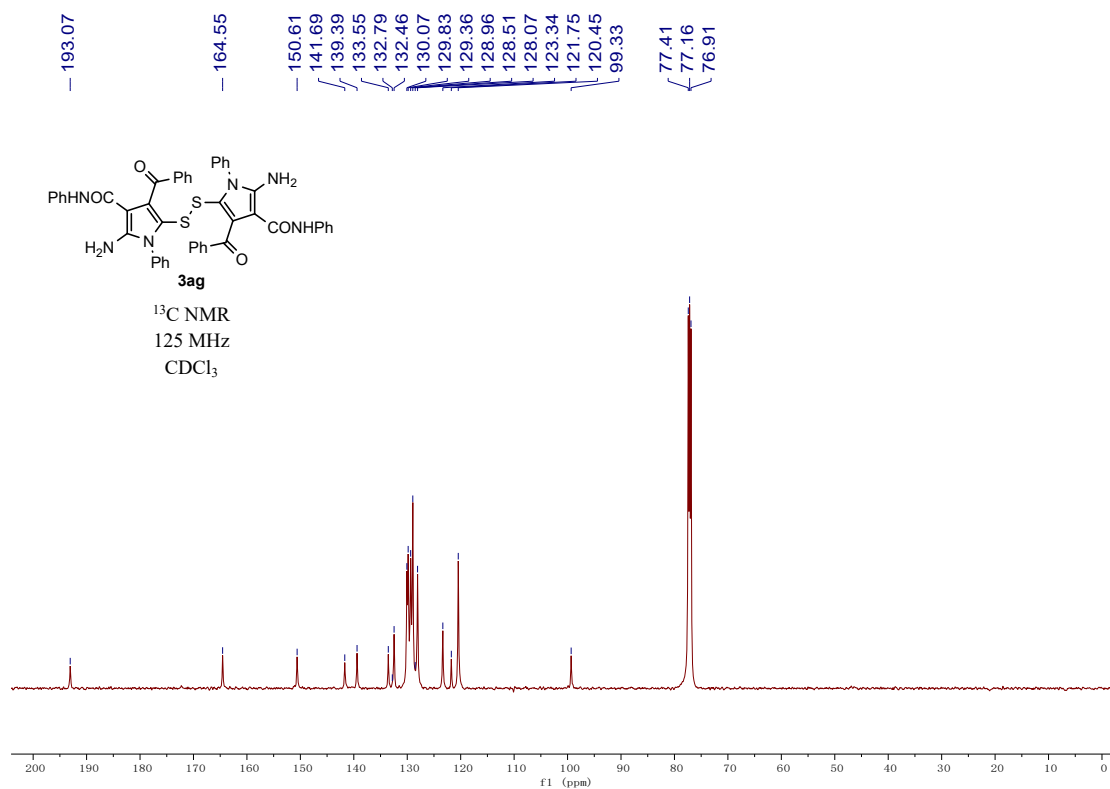



7.441  
7.425  
7.414  
7.371  
7.356  
7.341  
7.260  
7.238  
7.222  
7.199  
7.184  
7.176  
7.160  
7.146  
7.046  
7.031  
7.016

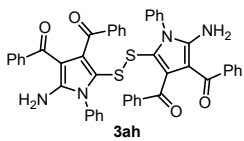

<sup>1</sup>H NMR  
500 MHz  
CDCl<sub>3</sub>

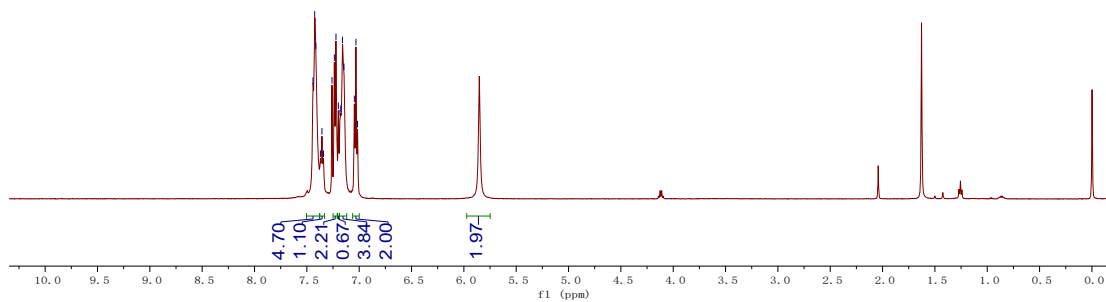

191.51  
191.24

150.12  
141.27  
138.68  
133.41  
132.70  
132.33  
130.52  
129.68  
129.56  
129.23  
127.99  
127.93  
127.71  
105.07

77.41  
77.16  
76.91

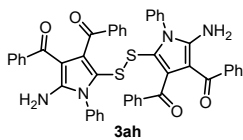

<sup>13</sup>C NMR  
125 MHz  
CDCl<sub>3</sub>

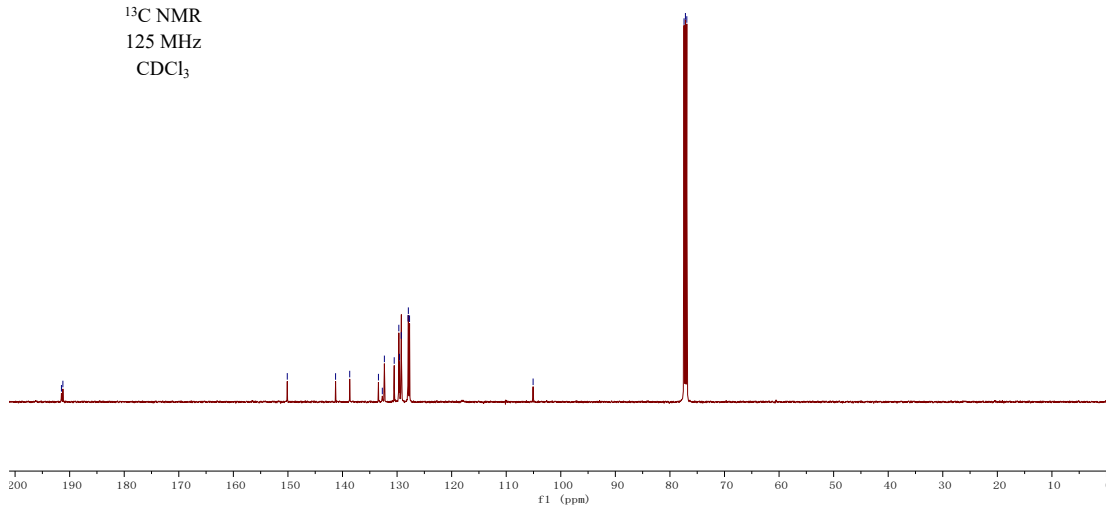

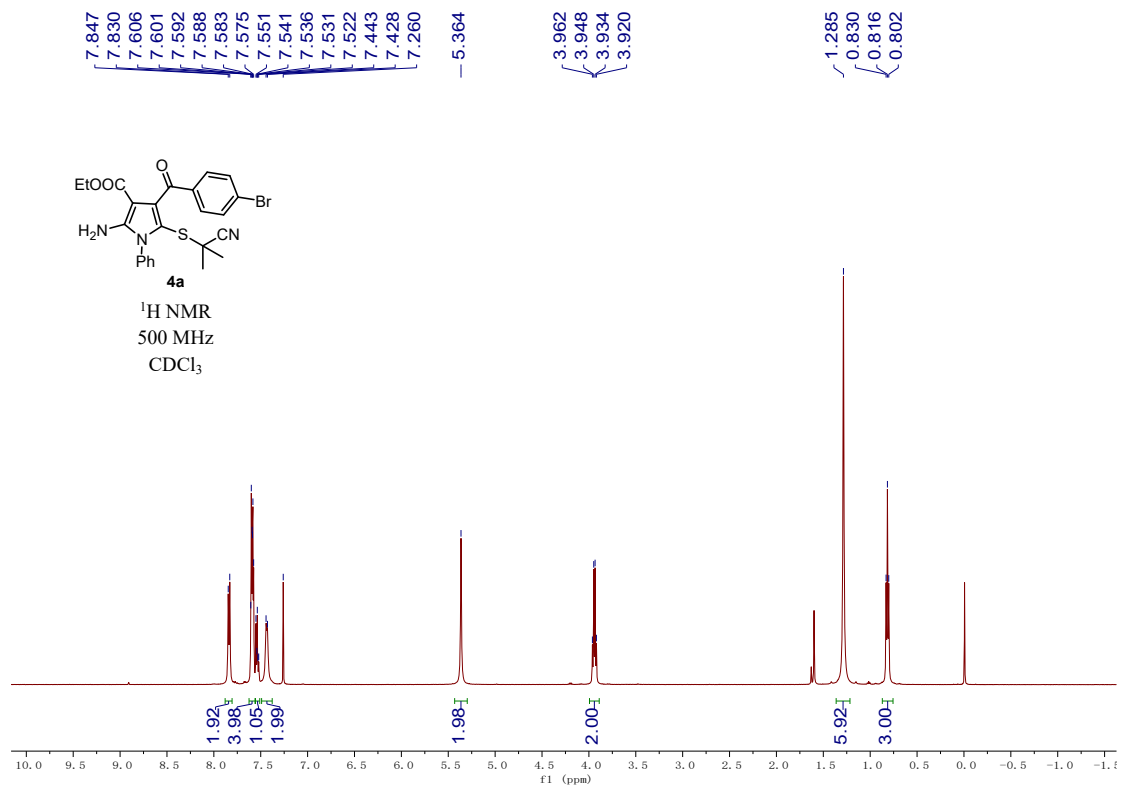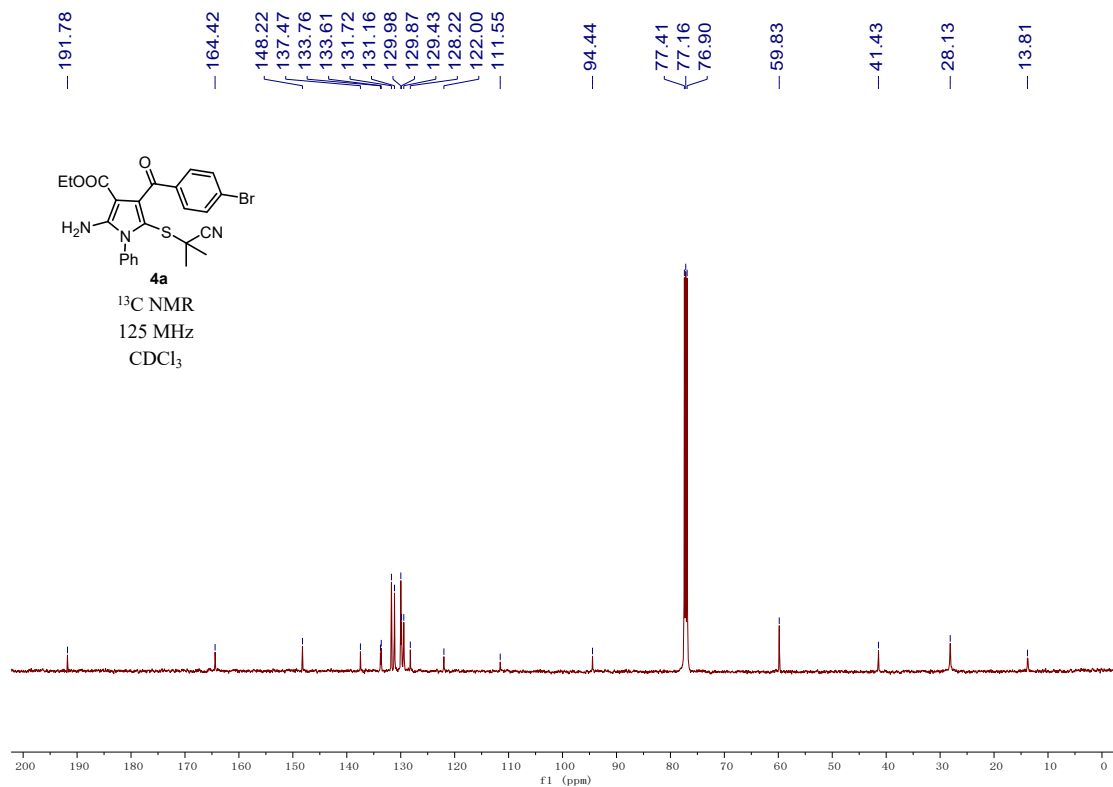

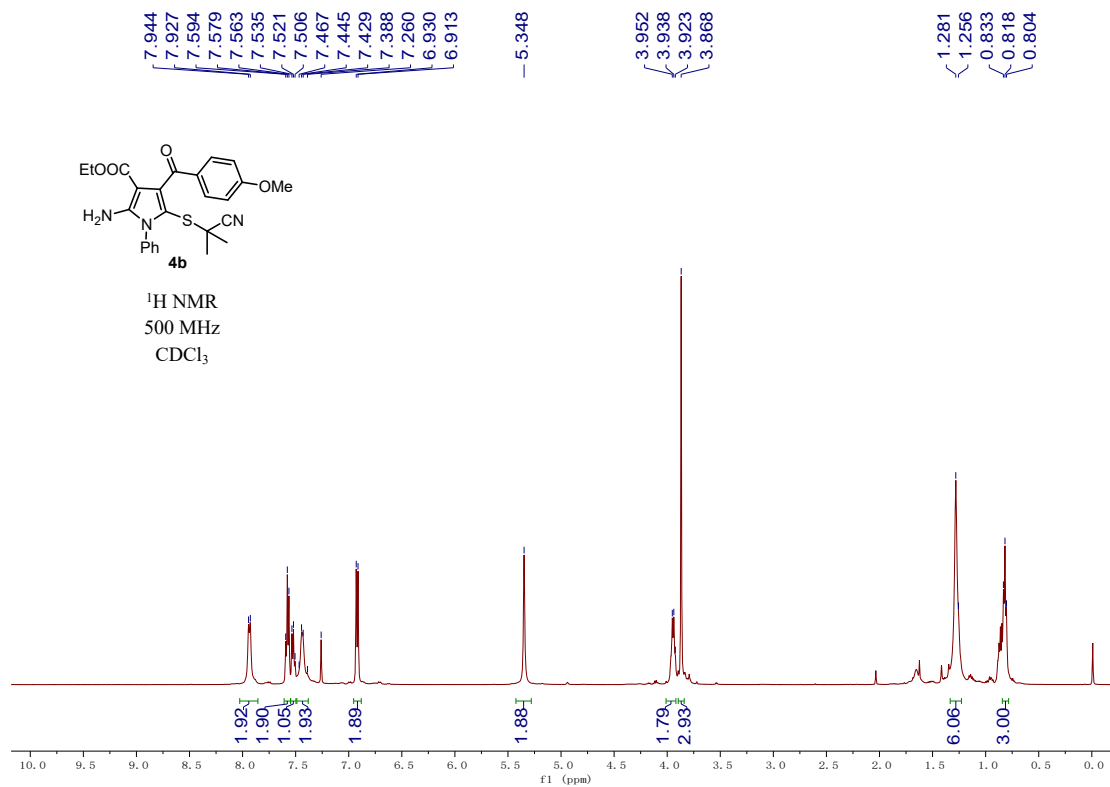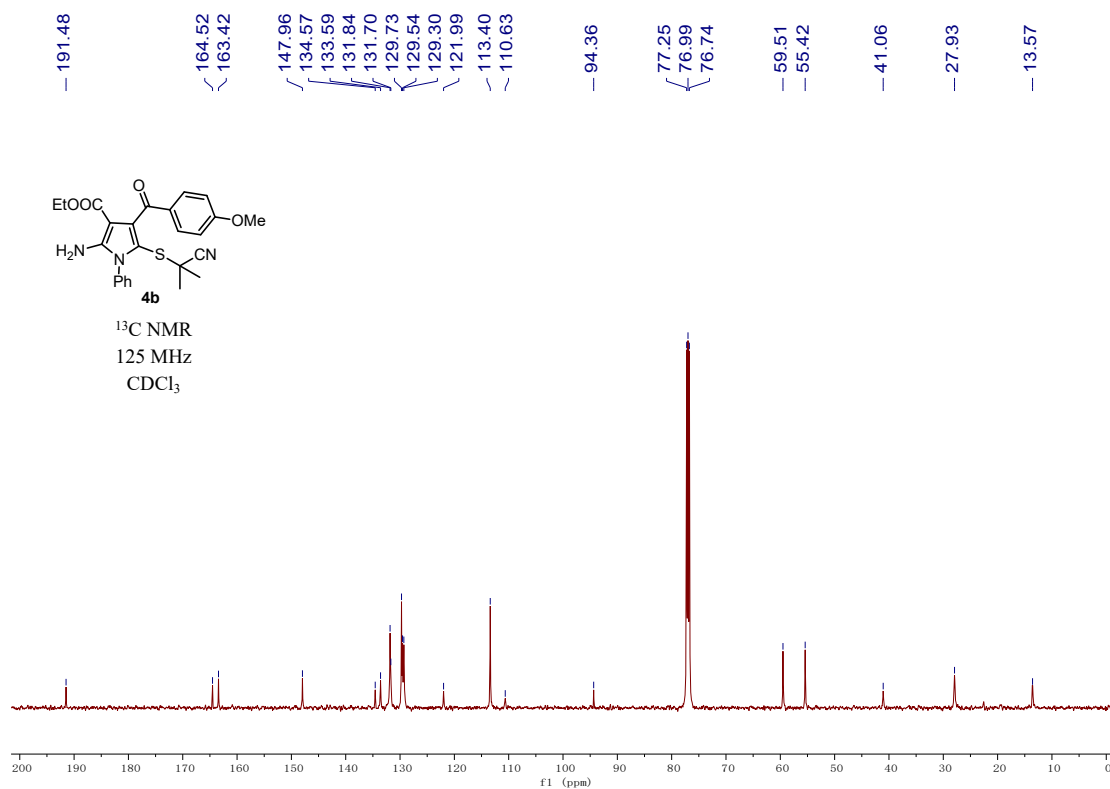

Supplement: d2ob01506d1.pdf [file d2ob01506d1.pdf]
